# Supplementary material for: The unique transcriptional response produced by concurrent estrogen and progesterone treatment in breast cancer cells results in upregulation of growth factor pathways and switching from a Luminal A to a Basal-like subtype
Source: BMC Cancer. 2015 Oct 24;15:791. doi: 10.1186/s12885-015-1819-3 (PMC4620010; doi:10.1186/s12885-015-1819-3)
Supplement: Additional file 5: — Genes significantly regulated by hormonal treatments in comparison to VC in T-47D cells. (XLS 233 kb) [file 12885_2015_1819_MOESM5_ESM.xls]

## Sheet: Additional file 5 
A. GENES SIGNIFICANTLY REGULATED BY P4 IN COMPARISON TO VC (adj. P < 0.01) IN T-47D CELLS
ID	logFC	AveExpr	t	P.Value	adj.P.Val	B	VCx1	VCx2	VCx3	E2x1	E2x2	E2x3	P4x1	P4x2	P4x3	E2+P4x1	E2+P4x2	E2+P4x3
MAFB	2.26956	6.42269	14.7167	1.04e-12	1.03e-08	18.2825	5.83526	6.13121	5.94396	5.7444	5.69261	5.86581	8.44613	8.11063	8.16236	7.37497	7.34507	7.16896
SGK	2.25667	5.18037	11.4436	1.29e-10	3.72e-07	14.1134	4.54191	4.18469	4.02976	4.66349	4.67051	5.2295	6.7533	6.36249	6.41059	5.4903	5.86831	5.82717
CLIC6	2.17654	6.93154	11.3477	1.51e-10	3.72e-07	13.9734	4.9734	5.64774	5.6892	7.58736	7.38938	7.73908	7.56605	7.55324	7.72065	7.38201	7.8366	7.26248
S100P	2.15943	7.30059	8.44914	2.81e-08	1.73e-05	9.1665	7.57054	7.28399	6.62433	6.38405	6.66383	5.94895	9.39756	9.39801	9.16157	6.89845	7.95454	7.558
LOC388610	2.1418	5.403	10.4591	6.76e-10	6.05e-07	12.6209	4.22831	4.94628	5.05885	4.95832	5.28148	5.08011	7.18631	6.69383	6.77868	6.13942	5.7119	5.34971
PNMT	1.76334	3.83147	10.5943	5.35e-10	5.85e-07	12.8333	2.8803	3.39949	3.54317	3.60207	3.86905	3.36702	5.03493	4.95465	5.12339	3.822	3.89238	3.86
STAT5A	1.70622	4.2923	6.14541	3.83e-06	0.000754119	4.48095	2.72961	4.08567	4.21844	4.33635	4.16265	4.35802	5.43588	5.27328	5.44324	4.73186	4.3639	4.29588
KCNG1	1.69659	5.00796	10.6637	4.75e-10	5.85e-07	12.9413	4.72309	4.71882	4.52157	4.87641	5.01691	4.49298	6.3695	6.1987	6.48506	5.61917	5.51806	5.18561
HSD11B2	1.66699	4.02977	6.58454	1.42e-06	0.000359077	5.43267	2.45916	3.67347	3.86594	4.15361	3.95874	4.16952	4.97443	4.86996	5.15516	4.77707	4.09732	4.25184
FKBP5	1.65206	8.19869	7.06876	4.91e-07	0.000161107	6.45146	7.0972	7.55971	7.60846	7.73886	7.47388	8.06321	9.1705	8.77367	9.2774	8.61125	9.00234	8.10011
SEPT4	1.59938	3.86534	8.23649	4.29e-08	2.35e-05	8.76682	3.84842	3.24397	3.65889	3.61123	3.88418	3.53604	4.85728	5.58739	5.10475	4.45484	4.10583	4.13921
SLC25A18	1.56554	5.60653	13.1126	9.84e-12	4.84e-08	16.3794	5.62186	5.32944	5.33332	5.10806	5.09226	5.00484	7.0549	6.95726	6.96907	6.1371	6.30987	6.13067
RUNX1	1.55559	5.22713	10.9528	2.91e-10	5.73e-07	13.3847	4.11678	4.30546	4.29464	5.87351	5.47518	5.88743	5.81871	5.71004	5.85489	5.53407	5.45418	5.01923
RBP2	1.53382	4.42338	7.27006	3.18e-07	0.000116075	6.86506	3.74985	4.45094	4.07591	4.07024	4.01013	4.12649	5.59627	5.84007	5.44183	4.1496	4.40487	5.1272
GJA1	1.4936	4.70129	6.46731	1.85e-06	0.000455002	5.1811	3.00377	4.08735	3.80469	4.98612	4.99957	5.44458	5.05045	5.11726	5.2089	4.74133	5.43515	5.27622
LOC93622	1.46517	7.93214	10.6034	5.27e-10	5.85e-07	12.8475	7.29847	7.77275	7.54917	7.62243	7.88321	7.53055	9.11175	9.01182	8.89232	7.97882	8.00334	8.14502
ATAD2	1.44902	7.72761	5.296	2.77e-05	0.0033644	2.57512	6.60393	7.19816	7.12576	7.62569	7.32514	8.19191	8.49734	8.49982	8.27774	8.04522	8.28098	8.00822
STMN3	1.43007	5.87243	5.77946	8.9e-06	0.00148462	3.66934	4.5477	5.54006	5.72306	5.98144	5.87136	5.80611	7.05235	6.40446	6.64422	5.84932	5.71342	5.47559
CMTM7	1.42997	7.15335	10.5318	5.96e-10	5.87e-07	12.7353	6.20351	6.09774	6.11898	7.87869	7.69822	7.49473	7.64253	7.42301	7.64459	7.56875	7.27285	7.42025
ATP1A1	1.42769	7.97089	5.30106	2.74e-05	0.0033644	2.58669	6.99211	7.5082	7.85457	7.75748	7.51429	7.92314	9.30521	8.30736	9.02538	8.51523	7.82866	8.22513
CD44	1.42514	5.54009	6.61018	1.34e-06	0.000357564	5.48744	4.16	5.1141	4.74654	5.99725	5.90747	6.26365	6.12888	5.91422	6.25298	6.02894	6.066	5.72149
SERPINA3	1.41962	4.55424	10.0351	1.42e-09	1.17e-06	11.9393	4.02214	4.12027	4.18938	4.60594	4.64277	4.2332	5.73425	5.41467	5.44173	4.74513	4.82215	4.63942
CXCL12	1.40429	4.79272	7.7864	1.07e-07	4.6e-05	7.89852	3.07275	3.22541	3.47314	6.58135	6.37701	6.86649	4.74093	4.72046	4.52279	4.64645	4.96868	4.54475
ZBTB16	1.38817	4.34926	6.87581	7.48e-07	0.00022993	6.04949	3.63427	3.89599	3.54646	3.793	3.57607	3.86201	5.56826	4.80003	4.87292	4.82133	4.71618	4.58794
P4HA2	1.38059	7.14658	7.30922	2.93e-07	0.000110869	6.94482	5.99565	6.91686	6.63508	7.29975	7.00801	7.32822	8.13109	7.86716	7.6911	7.38333	7.25467	7.58645
SLPI	1.37351	4.25294	5.56105	1.48e-05	0.00217699	3.17783	3.65378	4.08087	4.13033	4.21261	3.79814	3.99828	5.61259	4.87612	5.4968	3.65711	3.79787	4.86563
LCMT1	1.34577	9.02643	6.18926	3.47e-06	0.000696306	4.57711	8.68435	8.73058	8.54666	9.15752	9.27173	8.60784	9.8778	10.1491	9.97205	9.6567	9.39391	9.15362
MYC	1.3282	5.39694	5.43535	1.99e-05	0.0026666	2.89279	3.84335	4.43418	4.54868	6.10577	5.99766	6.57611	6.03391	5.31676	5.46015	5.72306	5.99696	5.55652
C1QDC1	1.32813	5.22332	5.66196	1.17e-05	0.00185762	3.40553	3.89333	5.04029	5.12949	5.04214	5.31273	5.54485	6.25281	5.79654	5.99815	5.2841	5.42796	5.62895
HOMER2	1.32238	5.84699	7.71776	1.24e-07	5.08e-05	7.76342	5.25238	5.73164	5.36933	6.26951	5.75171	5.69686	6.61132	6.9086	6.80056	6.3003	6.19232	5.98812
CDC45L	1.27584	4.31489	4.96184	6.14e-05	0.00581041	1.80733	2.71108	4.2101	4.1495	4.50233	4.8421	4.48958	4.97419	5.04258	4.88142	4.41745	4.51474	4.7574
RDH16	1.27031	4.62745	8.95209	1.05e-08	7.41e-06	10.0851	4.34119	4.67647	4.5754	4.31668	4.22653	4.10584	5.66513	6.0061	5.73278	4.93548	4.95034	5.09758
CYP27A1	1.26026	3.95846	7.84916	9.44e-08	4.22e-05	8.02142	3.24117	4.00645	3.80549	3.68358	3.84118	3.76156	5.16224	4.64468	5.02697	4.18074	4.0594	4.23267
RAPGEFL1	1.25604	5.48604	7.07543	4.84e-07	0.000161107	6.46526	3.88501	4.73758	4.87837	6.21608	6.10078	6.25836	5.59569	5.81299	5.8604	5.86678	5.94398	5.64497
TIPARP	1.24537	6.32877	6.73862	1.01e-06	0.000292633	5.76045	5.36751	5.80696	5.65167	6.35925	6.09108	6.46009	6.95859	6.73106	6.87262	6.66759	6.71072	6.67639
FXYD3	1.2279	4.53264	7.97194	7.34e-08	3.61e-05	8.26014	4.22629	4.39064	4.17869	4.35201	4.65708	4.13055	5.31994	5.68172	5.47766	4.54116	4.70859	4.76073
E2F7	1.22763	4.7045	4.19787	0.000387408	0.0201739	0.0355585	3.01095	4.55966	4.51449	4.7191	4.52627	5.22769	5.37641	5.15287	5.23872	4.81322	5.16951	4.95792
E2F1	1.22518	5.68326	5.21377	3.37e-05	0.00385178	2.38691	5.7048	4.99249	4.95122	5.93732	6.0074	5.61477	6.48617	6.44988	6.38801	6.23232	5.40821	5.76659
CA12	1.20331	9.17335	5.11097	4.3e-05	0.00440741	2.15091	8.46019	8.4432	8.56498	9.57656	9.44784	9.27698	9.74082	9.64981	9.68766	9.92098	9.31385	9.0575
C22orf19	1.18944	5.37901	5.64788	1.21e-05	0.00188926	3.37383	5.26012	4.85065	4.7734	5.48177	5.76395	5.13696	6.22639	6.18671	6.03939	5.85593	5.3118	5.45622
MYEOV	1.18001	4.20828	4.58102	0.000153443	0.0111043	0.925197	2.6729	4.02864	3.95407	4.66912	4.49659	4.43816	4.77418	4.63114	4.79034	4.5315	4.26314	4.32131
ACSL1	1.14379	5.75368	6.3721	2.29e-06	0.000512399	4.97543	5.07596	5.54131	5.57011	5.32931	5.37012	5.84538	6.70154	6.34164	6.57557	6.35789	6.10735	6.06711
DCC1	1.12364	4.76465	4.36005	0.00026171	0.0155928	0.411953	3.17902	4.56368	4.58419	4.86219	4.94795	5.36625	5.42355	5.09404	5.18023	5.09856	5.44963	5.09442
EXO1	1.12272	5.83809	6.37869	2.26e-06	0.000512399	4.9897	4.79215	5.57776	5.3704	6.06467	6.09334	6.12982	6.43613	6.28843	6.38391	6.21475	6.1541	6.13766
ZIC2	1.11842	4.67943	4.3788	0.000250113	0.0151019	0.455486	3.07334	4.59893	4.45023	4.54538	4.76726	5.0082	5.26564	5.06568	5.14644	4.91303	5.30019	4.92043
RBPMS2	1.11456	6.11947	4.78684	9.34e-05	0.00795122	1.40261	5.01784	5.71328	5.81466	6.47859	6.41568	6.30068	6.81544	6.38834	6.6857	6.58238	6.24129	6.09137
GPSM2	1.11438	6.92506	6.59601	1.39e-06	0.000359077	5.45719	6.27072	6.57198	6.53317	6.55721	6.43508	6.9089	7.73665	7.44787	7.5345	7.43441	7.49636	7.25469
TM4SF11	1.11259	4.47825	6.74584	9.95e-07	0.000292633	5.77573	4.03595	4.17618	4.19391	4.37076	4.39251	4.18074	5.56974	4.87522	5.29886	5.16133	4.43397	4.84579
IMPDH1	1.1102	6.5413	3.94612	0.000711728	0.0293089	-0.546613	6.87848	5.89726	6.39576	6.66514	6.75963	5.81811	7.24188	7.88092	7.37929	6.97291	6.81557	6.50132
RAD51	1.10986	4.55293	5.2804	2.87e-05	0.00340704	2.53946	3.41752	4.35036	4.24298	4.64787	4.65072	4.86422	5.2089	5.17605	4.95548	5.02128	4.82047	5.10394
MASTL	1.10935	4.37942	4.00844	0.000612347	0.0269703	-0.402849	2.78448	4.414	4.21376	4.40687	4.39248	4.80239	5.01368	4.89371	4.83288	4.34662	5.04976	4.49829
FLJ10847	1.10399	4.11958	5.13395	4.07e-05	0.00426122	2.20374	2.57279	3.78903	3.65651	4.48448	4.31205	4.61322	4.66142	4.22699	4.44189	4.34472	4.54727	4.44189
CTPS	1.08893	5.00934	5.26223	3e-05	0.00351477	2.49789	3.66322	4.61764	4.50272	5.46979	5.48192	5.71964	5.53502	5.35533	5.16003	5.02713	5.4496	5.20395
ADAMTS8	1.08023	4.43632	4.45189	0.000209603	0.0139386	0.625271	4.69129	3.96929	3.45227	4.42863	3.8198	4.21356	5.33449	4.94119	5.07787	4.65117	4.14328	4.613
SLC7A1	1.0662	5.49452	5.78758	8.73e-06	0.00148197	3.68753	4.27257	5.01908	4.99235	5.93579	5.95248	6.0353	5.82013	5.65022	6.01224	6.04882	5.66583	5.50136
NDRG1	1.065	6.44067	6.03861	4.89e-06	0.000908421	4.24572	6.85589	6.8977	6.74194	5.17382	5.30346	5.04665	7.94172	7.94986	7.79895	6.87161	7.45552	6.64165
HERC5	1.05867	3.48608	5.69109	1.09e-05	0.00176394	3.47108	2.40361	3.21865	2.92569	3.7405	3.86475	3.78122	3.87819	3.89781	3.94795	4.12196	3.82355	3.56693
ATP1B1	1.04875	7.96395	3.68321	0.00133959	0.0433693	-1.14947	7.18498	7.49924	7.38624	7.48608	7.12852	8.22472	8.73274	8.02848	8.45549	8.24091	8.74276	8.48192
FADS1	1.04867	6.1085	5.75306	9.46e-06	0.00155226	3.61021	5.25075	6.01082	5.83416	6.20782	6.11725	6.33335	6.91487	6.49181	6.83504	6.28421	5.67229	6.22385
Pfs2	1.04838	10.3068	8.60184	2.08e-08	1.36e-05	9.44936	9.69919	10.0053	9.95717	10.3992	10.3474	10.3413	10.9619	10.955	10.8898	10.7615	10.4565	10.4447
DSCR6	1.04408	6.88254	5.16673	3.76e-05	0.00420982	2.27903	5.97689	6.54935	6.61084	6.53458	6.73613	6.87075	7.5406	7.41814	7.31057	7.06102	7.37291	7.45277
OLFM1	1.03813	7.09817	5.54846	1.53e-05	0.00217728	3.14935	5.72944	5.96676	6.21112	8.16664	8.07028	8.63666	7.29771	6.62287	7.10112	7.5419	7.52051	7.23044
UNQ3045	1.03675	5.97847	4.33784	0.00027615	0.0161778	0.360376	5.46641	5.5255	5.1668	6.79688	6.7855	5.91524	6.30175	6.35343	6.61377	5.85081	5.82472	5.8591
DEGS1	1.03096	6.93226	7.51002	1.91e-07	7.53e-05	7.35028	6.17388	6.71589	6.27188	7.13182	6.96189	7.25791	7.47764	7.32696	7.44993	7.15392	7.27579	7.11352
CHPT1	1.02761	8.08934	6.66157	1.2e-06	0.000337131	5.59696	7.19832	7.70934	7.4924	8.13194	8.18001	8.00433	8.52902	8.49963	8.45423	8.47661	8.09616	8.3698
KIAA0830	1.02471	3.65261	4.76762	9.79e-05	0.00816299	1.35809	2.37234	3.46247	3.42915	3.74872	3.84631	3.95953	4.10432	4.20684	4.02693	3.43137	3.81869	3.74643
POLE2	1.02179	6.1134	6.44173	1.96e-06	0.000470139	5.12596	5.19771	5.88317	5.6703	6.30501	6.21733	6.43193	6.65671	6.56435	6.59549	6.1271	6.4686	6.43124
PKMYT1	1.02	5.44596	4.59174	0.000149524	0.0110648	0.950087	4.56052	5.03104	5.4254	5.81933	5.6148	5.42592	6.12889	5.79554	6.15252	5.98153	5.28368	5.31897
CDC25A	1.01996	3.71762	4.98474	5.81e-05	0.00555384	1.86018	2.86164	3.15641	3.3605	3.81456	4.109	4.15945	3.9592	4.4505	4.02871	3.94187	3.33127	4.01921
BCAS4	1.00823	8.33286	5.60628	1.33e-05	0.00202363	3.28002	8.4696	7.84914	7.99098	8.51269	8.58124	8.05435	8.89455	9.2171	9.22276	8.71445	8.30037	8.28126
PDLIM1	1.00632	7.12029	4.01757	0.000598992	0.0265553	-0.381759	7.41082	6.90223	6.5719	7.29197	7.51891	6.39974	7.62119	8.29276	7.98998	7.23335	7.0406	7.07
E2F2	1.00366	6.94734	4.4149	0.000229205	0.014744	0.539352	6.54521	6.32171	6.32369	7.28936	6.99946	7.29927	7.69874	6.96828	7.53458	7.49524	7.04369	6.99091
FAM105A	0.9907	3.93375	8.13475	5.27e-08	2.73e-05	8.57321	3.6811	3.51481	3.56418	3.89834	3.76479	3.87322	4.67263	4.64092	4.41864	4.30737	4.077	4.30585
POLQ	0.985316	4.66963	5.37595	2.29e-05	0.00300718	2.75758	3.84101	4.27825	4.33292	4.68751	4.85936	4.93957	5.15678	5.09725	5.1541	5.08014	5.20846	4.75484
MCM10	0.977842	5.5293	4.00744	0.000613832	0.0269703	-0.405165	4.71788	4.91361	4.9085	5.70707	5.74951	5.94267	5.838	5.84935	5.78616	5.97001	6.02212	6.02427
KNTC2	0.975017	4.63132	4.15614	0.000428542	0.0211811	-0.0611644	3.65214	4.48645	4.46087	4.83064	4.63818	5.22988	5.13775	5.18781	5.19895	4.60332	5.23431	4.97487
TRIP13	0.972728	7.61797	5.55162	1.52e-05	0.00217728	3.1565	6.69028	7.26432	7.26323	7.79567	7.73443	8.08994	8.18911	7.90973	8.03717	7.68819	8.219	7.84104
FAM57A	0.967504	4.61454	8.34801	3.43e-08	1.99e-05	8.97727	3.94634	4.24625	4.13218	4.98612	5.01467	5.01065	5.09543	5.1174	5.01446	4.78336	5.02701	4.72785
CDCA5	0.94832	8.71437	5.35335	2.42e-05	0.00313047	2.70606	7.94844	8.19907	8.41093	8.83354	8.65855	9.06214	9.45393	8.85714	9.09233	8.95562	9.38482	8.91065
LRRFIP2	0.934529	4.25093	5.56677	1.46e-05	0.00217699	3.19077	3.58008	3.86674	3.69566	4.4183	4.43085	4.39797	4.98732	4.49814	4.46062	4.52375	4.37257	4.42871
MTHFD1	0.933518	4.98394	4.43893	0.000216273	0.0141904	0.595161	4.05834	4.79078	4.84663	5.46065	5.38259	5.09234	5.43154	5.41751	5.64726	5.12066	4.96326	5.01635
MPHOSPH10	0.93306	7.03331	4.7489	0.00010238	0.00846743	1.3147	6.19778	7.00187	6.99045	6.73376	6.65865	7.26241	7.60413	7.77344	7.61172	7.20373	7.30736	7.44073
DCLRE1C	0.93141	4.72201	5.04273	5.06e-05	0.00497963	1.99387	3.77961	4.55818	4.60037	4.84387	4.54378	4.90971	5.29907	5.16823	5.26509	4.97194	5.04897	5.03286
DKFZp762E1312	0.930995	5.86307	5.13772	4.03e-05	0.00426122	2.21241	5.09714	5.57597	5.52937	6.20549	5.8535	6.13107	6.44175	6.17062	6.38309	6.08821	5.76934	6.15956
ARRB1	0.928097	4.90222	4.43131	0.000220291	0.0143232	0.577467	5.27844	4.60524	4.32029	4.82805	5.06732	4.48675	5.54791	5.82084	5.6195	5.15488	5.43473	5.14818
SPBC25	0.919147	5.38645	3.87792	0.000838929	0.031635	-0.70363	5.00526	5.28525	4.86282	5.67375	5.70598	5.27104	5.80391	6.04591	6.06094	5.28357	5.57595	5.86361
PACSIN1	0.917236	7.12163	3.85776	0.00088068	0.0324628	-0.749975	7.30718	6.92451	6.96605	6.72424	6.79746	6.69727	8.00143	8.08073	7.86729	7.85998	7.49033	7.0713
PTPNS1	0.916825	4.86343	4.39948	0.000237914	0.0148199	0.503522	3.69923	4.57785	4.74628	4.91216	4.84921	5.01516	5.32331	5.27036	5.18017	5.03192	5.08316	4.94911
ADCY3	0.910287	5.45996	4.94792	6.35e-05	0.00595023	1.77519	5.08028	4.90053	4.78302	5.87905	5.86628	5.99503	5.8133	5.73319	5.9482	5.6579	5.33792	5.44962
CHD5	0.904739	3.99291	4.05568	0.000546313	0.0250084	-0.293685	3.2602	3.71936	3.82635	4.05573	4.09633	4.0379	4.63574	4.54409	4.34029	4.74343	4.27865	4.07087
ASF1B	0.903047	5.72231	3.9767	0.000661107	0.028108	-0.476104	5.59615	5.26504	5.3812	5.96724	6.35229	5.5092	6.31739	6.33878	6.29536	6.09118	5.243	5.94054
AK3L1	0.899696	4.61903	4.36048	0.000261438	0.0155928	0.412951	4.35712	4.33897	4.21344	4.56027	4.49951	4.64927	5.25013	5.21242	5.14606	5.31808	4.35224	5.16224
GRB10	0.897362	4.93298	4.55471	0.000163506	0.011413	0.864086	3.89959	4.59215	4.70593	5.30823	5.12458	5.37687	5.30316	5.25172	5.33488	5.40823	5.3418	4.74256
SLC25A19	0.895587	6.11761	4.23598	0.000353294	0.018918	0.123953	5.69193	5.54957	5.70437	6.48377	6.65011	6.08713	6.48836	6.67915	6.46511	6.40515	6.41775	6.14097
TTLL12	0.892523	6.5345	5.24263	3.14e-05	0.00363881	2.45303	6.22725	6.04127	6.18528	6.88005	6.63281	6.74883	7.079	6.96012	7.09224	6.65204	6.5372	6.49946
MCM7	0.891186	8.46423	4.64893	0.000130259	0.00993803	1.08283	7.89178	8.09901	7.96995	8.55906	8.49985	8.88727	9.00563	8.83873	8.78994	8.75177	8.85397	8.65898
TAF5L	0.889318	5.30228	4.92497	6.71e-05	0.00622737	1.72218	4.34231	5.12654	5.15366	5.49735	5.24401	5.4466	5.52153	5.99257	5.77637	5.78688	5.23676	5.3738
ATAD4	0.879605	7.64465	5.45936	1.88e-05	0.00257286	2.94735	7.78167	7.49079	7.52005	7.05176	7.3802	6.87001	8.60973	8.34476	8.47683	7.90078	8.07002	7.65278
PBK	0.877488	6.10049	5.15006	3.92e-05	0.00426122	2.24075	5.31242	6.07295	5.57082	6.24628	6.16167	6.46877	6.60639	6.51068	6.47158	6.18498	6.38811	6.43772
FLJ13909	0.873922	5.92207	3.84009	0.00091896	0.0330088	-0.790561	6.16425	5.37845	5.27213	6.20517	6.26453	5.70386	6.23185	6.81954	6.3852	6.49248	6.19034	5.99522
RCL1	0.869784	4.4426	5.05171	4.95e-05	0.00492575	2.01456	3.45721	4.22481	4.12589	4.54575	4.67782	4.74388	4.91882	4.78908	4.70937	4.60328	4.59016	4.52705
DPYSL2	0.869712	7.53383	3.88363	0.00082747	0.0314738	-0.690504	6.87707	7.21625	7.20358	7.36131	7.12019	7.91896	8.28412	7.52529	8.09662	7.87803	8.08115	7.81204
MCM2	0.868729	6.3426	4.69225	0.000117344	0.00923917	1.18334	5.71531	5.93475	5.98958	6.60968	6.51273	6.73259	6.95361	6.48247	6.80974	6.31093	6.24388	6.45012
RFC3	0.863677	5.11535	4.15571	0.000428988	0.0211811	-0.0621628	4.05491	5.11544	4.78698	4.97081	5.19048	5.43775	5.70424	5.22817	5.61595	5.50742	5.54183	5.34052
MRAS	0.861834	3.25107	4.40987	0.000232011	0.0147743	0.527661	2.28512	3.19567	2.92668	3.44174	3.06942	3.43647	3.85604	3.53292	3.604	3.52935	3.14013	3.22535
RASSF1	0.861718	5.51435	6.38242	2.24e-06	0.000512399	4.99778	4.81011	5.21915	5.07835	5.68036	5.60976	5.91009	6.12474	5.69741	5.87061	5.49897	5.59696	5.71354
KIF15	0.861653	4.91126	4.05574	0.000546235	0.0250084	-0.293548	4.6568	4.92708	4.43413	4.96377	4.68639	5.22126	5.29407	5.66623	5.64266	4.60535	5.27152	5.19518
FLJ35779	0.858716	5.38031	5.18133	3.64e-05	0.0041128	2.31253	5.17186	5.37076	5.14247	5.20438	5.42552	5.29426	6.16201	6.22441	5.87481	5.64552	5.49918	5.38134
GAS6	0.853437	6.69931	4.16802	0.000416406	0.0211359	-0.0336336	6.06678	6.26689	6.50027	6.91408	6.84421	7.00088	7.1901	7.10705	7.09711	7.42189	6.59538	6.56059
RAD54L	0.849487	3.9374	3.6706	0.00138068	0.0438382	-1.1782	2.7897	3.87345	3.83882	4.05987	3.99648	4.18912	4.59554	4.17466	4.28023	3.91609	4.34148	4.05856
NET1	0.844648	6.48023	4.16722	0.00041721	0.0211359	-0.0354834	6.14664	6.05109	6.15982	6.15573	5.97724	6.92147	7.08021	6.78378	7.0275	7.12561	6.87053	6.80359
TSC22D1	0.843289	7.38752	4.56804	0.000158326	0.0112916	0.895057	7.04493	7.84141	7.5901	6.93854	7.05042	6.74559	8.34063	8.58882	8.07685	7.53299	7.7158	7.76952
RBM24	0.840535	4.12088	4.83618	8.3e-05	0.00735909	1.51687	2.96785	3.66837	3.59484	4.60109	4.47625	4.80909	4.40005	4.17044	4.18219	4.27523	4.49026	4.56343
FADS3	0.838617	5.56187	3.60705	0.00160747	0.0481521	-1.32267	5.34129	5.24813	5.05407	5.73499	6.03731	5.31385	6.29557	6.00088	5.86289	5.73248	5.69847	5.60106
KIF2C	0.834995	6.05497	4.91686	6.84e-05	0.00629022	1.70345	5.85189	5.8847	5.71755	6.1668	6.38078	5.82431	6.52693	6.91823	6.51397	6.21603	6.31925	5.93434
RAD51C	0.834221	6.17095	4.57148	0.000157017	0.01128	0.903042	5.62311	5.78626	5.89474	6.39023	6.38911	6.39247	6.53585	6.69951	6.57142	5.78118	6.16529	6.64147
CDKN2D	0.833981	3.92335	4.29779	0.000304243	0.0173084	0.267372	4.22362	3.31835	3.76255	3.43595	4.1758	3.64672	4.72526	4.6322	4.44901	4.34305	4.1626	3.97886
CDKN2C	0.830414	3.84941	5.32573	2.58e-05	0.00324957	2.64303	3.22706	4.02716	3.36528	3.89973	3.65316	3.88792	4.48311	4.24255	4.38508	4.1838	4.1518	4.05626
TSPAN33	0.819564	5.63577	4.21818	0.000368838	0.0193091	0.0826585	5.12242	5.47769	5.10142	5.77228	5.82623	5.41531	6.09011	5.89067	6.17944	5.97633	5.42657	5.54984
CDKN1A	0.817845	7.70376	4.58215	0.000153027	0.0111043	0.927809	7.72217	7.49814	7.75772	7.43754	7.53754	7.33685	8.61955	8.50323	8.30878	8.311	7.98489	7.84108
C17orf53	0.814202	5.99773	5.80942	8.3e-06	0.00143345	3.73636	5.53377	5.59617	5.63555	6.15043	6.3176	6.05714	6.51231	6.41078	6.28502	6.10752	6.44344	6.0339
ESPL1	0.813443	5.5179	4.25677	0.000335973	0.0183702	0.172177	5.23492	4.99802	5.43609	5.58917	5.5986	5.6348	6.17222	5.93957	5.99756	5.79193	5.28704	5.38124
KIF23	0.812749	5.89413	4.38942	0.000243772	0.014995	0.480154	5.44828	5.72865	5.41065	5.87645	5.88083	6.24322	6.43051	6.33311	6.26221	6.05142	6.08003	6.13442
CENPA	0.808422	6.30635	3.99874	0.000626863	0.027299	-0.425253	5.44948	6.23398	5.94864	6.39542	6.27475	6.49359	7.02882	6.47032	6.55822	6.66636	6.40861	6.59908
ST3GAL4	0.800416	6.68778	3.99191	0.000637275	0.027509	-0.441004	6.90387	6.4866	6.28397	6.72645	6.72165	6.24682	7.49069	7.36046	7.22455	7.22345	6.96996	6.67688
FLJ13912	0.792845	5.24143	5.43255	2e-05	0.0026666	2.88642	4.52838	5.01762	4.85629	5.52562	5.2815	5.43981	5.54671	5.60701	5.62711	5.3031	5.38797	5.55385
OSBPL10	0.792692	4.61447	3.91904	0.000759773	0.0305568	-0.609013	3.47293	4.50423	4.4694	4.99068	4.82513	5.03705	5.09166	4.78937	4.94361	4.57647	4.71623	4.78179
IRAK1	0.791975	6.67745	4.72995	0.000107158	0.00871607	1.27078	6.06734	6.37321	6.40262	6.94851	6.78597	6.86357	7.11107	6.94894	7.15909	6.58763	6.58673	6.72724
AURKB	0.79193	7.35188	5.48178	1.79e-05	0.00247496	2.99824	7.11965	7.12132	7.07922	7.63249	7.66366	7.18318	7.90019	7.89347	7.90232	7.13114	7.36735	7.49876
CCND3	0.785901	8.98736	4.84641	8.1e-05	0.00724572	1.54054	8.66331	8.55381	8.62305	9.1812	9.208	8.88478	9.44498	9.38556	9.36733	9.6207	9.17332	9.20616
EGFR	0.785255	4.00008	4.69966	0.000115269	0.00914899	1.20052	3.16744	3.99553	4.00522	3.96922	3.94628	4.10888	4.40905	4.48083	4.63407	3.99333	4.22644	4.14629
SLBP	0.778215	5.85988	5.02869	5.23e-05	0.00509543	1.96151	5.48646	5.627	5.33622	6.00299	6.0096	5.93668	6.33558	6.39613	6.05262	6.14669	6.27091	5.99782
MELK	0.772819	6.62293	3.91518	0.000766869	0.0305568	-0.617891	5.86797	6.51447	6.36822	6.64305	6.58902	6.95221	7.02352	7.16184	6.88376	6.8347	7.05668	6.70987
SLC25A10	0.772538	7.12896	3.75599	0.00112494	0.0380468	-0.983297	7.13934	6.82788	6.81465	7.39721	7.38581	6.95111	7.72368	7.7582	7.6176	7.71446	7.04111	7.29617
LHFP	0.770065	5.43246	4.40602	0.00023418	0.0147743	0.518721	4.73833	4.99975	4.87147	5.93301	5.79186	6.20421	5.6946	5.65169	5.57344	5.462	5.47566	5.788
MAN1A1	0.769248	3.45377	3.8794	0.000835938	0.031635	-0.700222	2.99241	3.14751	2.80381	3.63051	3.17841	3.84147	3.7661	3.73961	3.74577	3.92547	4.30141	3.82219
CREB3L2	0.768365	6.10063	3.85903	0.000877983	0.0324628	-0.747048	5.25673	5.98936	6.19402	5.78502	5.81181	6.33715	6.68454	6.4492	6.61147	6.31946	6.13161	6.2009
KCNJ11	0.767148	3.30095	5.02483	5.28e-05	0.00509543	1.95262	2.58446	3.14937	3.2826	3.3544	3.12473	3.3706	3.68507	3.849	3.78381	3.29867	3.21122	3.48345
CDCA4	0.767114	6.11971	5.50021	1.71e-05	0.00240382	3.04004	5.59879	5.70511	5.77229	6.29616	6.26695	6.18182	6.60244	6.31	6.4651	6.52047	6.39652	6.21347
UBE2C	0.766111	3.99682	4.38094	0.000248818	0.0151019	0.460472	3.30042	3.86905	3.69094	4.27848	4.2965	4.024	4.46705	4.20461	4.48708	4.053	4.04083	4.32457
PHLDA2	0.7644	3.81288	3.67422	0.00136875	0.0438382	-1.16995	3.44172	3.46864	3.47694	4.60169	4.31253	3.63648	4.11602	4.41206	4.15241	4.45236	3.50189	3.9562
C3orf26	0.760966	4.74046	4.22685	0.000361183	0.0191023	0.10277	4.27821	4.52793	4.17774	5.3007	5.22743	4.9194	4.95033	5.35919	4.95726	4.46084	4.50118	5.11734
POLA2	0.760933	6.88849	5.05149	4.95e-05	0.00492575	2.01405	6.73624	6.44137	6.56038	7.12443	7.11557	6.85171	7.48109	7.22545	7.31424	7.20989	7.31645	7.12943
DKFZp686O24166	0.760771	4.15265	3.66909	0.00138567	0.0438512	-1.18162	3.51165	3.68111	3.74373	4.35945	4.49759	4.859	4.37112	4.74618	4.10151	4.57113	3.92373	4.33736
WDR51A	0.760191	4.00271	4.16568	0.000418767	0.0211359	-0.0390533	3.11275	4.15358	3.90484	4.18417	4.16886	4.04374	4.51669	4.47489	4.46015	4.04454	4.10783	3.95881
LIN7B	0.755891	4.83736	3.68034	0.00134882	0.0433828	-1.156	4.09324	4.9274	4.99168	4.95156	4.77341	4.46266	5.43004	5.30872	5.54123	4.79955	4.64909	5.04019
STMN1	0.754038	6.17784	5.28392	2.85e-05	0.00340704	2.54751	5.79475	6.0365	5.91618	6.32507	6.41506	6.12717	6.63158	6.6866	6.69136	6.14778	6.02616	6.63966
TUBB	0.752844	8.62881	3.9724	0.000668006	0.028108	-0.486027	8.00829	8.23903	8.39494	8.78772	8.81863	8.72941	9.25438	8.76685	8.87958	8.90639	8.62563	8.98782
SFXN2	0.752824	5.4227	4.66259	0.000126039	0.00976755	1.11452	4.68487	4.79842	4.86618	6.18559	6.36751	6.08514	5.2304	5.79485	5.5827	5.28122	5.30878	5.52296
SGOL1	0.752682	4.22011	4.38111	0.000248718	0.0151019	0.460859	3.44673	4.06613	3.96943	4.2961	4.53918	4.46925	4.5633	4.63941	4.53762	4.31838	4.50735	4.58935
PFKP	0.749313	7.81907	4.62221	0.000138927	0.0105178	1.02082	7.21719	7.57649	7.54084	8.22167	8.09202	7.96523	8.16903	8.18113	8.2323	7.93233	8.2494	8.00041
SLC39A14	0.746149	3.86427	3.97223	0.000668286	0.028108	-0.486427	2.991	3.76793	3.65526	3.9944	4.04752	4.34589	4.18947	4.13783	4.32534	3.89524	3.62791	3.80596
FLJ20366	0.743562	4.68974	3.88919	0.000816454	0.0314738	-0.677711	4.00646	4.53635	4.48289	4.49004	4.3963	4.53449	5.37129	4.62045	5.26464	4.87775	5.03322	5.15009
NAGK	0.743529	8.2593	4.00297	0.000620487	0.0271415	-0.415477	8.51222	8.18961	8.12043	8.13238	8.22818	7.66603	8.67518	9.33309	9.04458	8.31701	8.72655	8.19085
KCNF1	0.743315	4.61444	3.77128	0.00108436	0.0370842	-0.94831	4.29817	3.87273	3.939	5.55704	5.59438	5.05285	4.79156	4.87717	4.67112	5.26943	4.87182	4.85088
UBE2T	0.743141	7.49525	4.26397	0.000330171	0.0181539	0.188888	7.05668	7.19917	7.09307	7.72241	7.60652	7.76499	8.08411	7.64426	7.84997	7.08153	7.53085	7.87762
ADFP	0.742289	6.15018	4.31069	0.000294896	0.0168742	0.297324	6.47552	6.22642	5.98088	6.11386	5.99358	5.62074	6.81353	7.13813	6.95803	6.01548	6.29005	6.48179
TMEM16A	0.740068	4.04233	4.7092	0.000112648	0.00904784	1.22266	3.24604	3.91831	3.8497	4.00013	3.99857	4.24011	4.49611	4.38072	4.35742	4.36199	4.2708	4.16415
DONSON	0.739028	5.55183	4.81564	8.72e-05	0.00755868	1.4693	4.90504	5.44165	5.15356	5.51938	5.52842	5.86197	6.11243	5.86026	5.74464	5.60806	5.82386	5.75533
CDCA2	0.738649	4.80262	3.95273	0.000700482	0.0290892	-0.531396	4.49827	4.56101	4.52982	5.12851	5.20038	4.77327	5.16443	5.20744	5.43317	4.84951	4.70655	5.06526
CHEK1	0.738453	6.61055	3.87598	0.00084285	0.0316616	-0.70808	5.77208	6.53639	6.29086	6.72574	6.63934	7.00026	6.93778	7.04727	6.82964	6.55832	6.7329	7.00988
TYMS	0.735618	7.37528	4.1702	0.000414219	0.0211359	-0.0285874	6.63133	7.19684	7.08618	7.53199	7.51164	7.60035	7.74619	7.7328	7.64222	7.36755	7.94072	7.52638
PGM1	0.735438	7.75231	5.1489	3.93e-05	0.00426122	2.23808	7.34455	7.5805	7.42277	7.85333	7.80798	7.80893	8.28602	8.1876	8.08052	7.72978	8.05015	7.57747
C8orf32	0.734892	5.89478	4.31474	0.000292017	0.0168072	0.30674	5.59991	5.91811	5.60332	6.03708	5.98294	5.73023	6.35697	6.55636	6.41269	5.49441	5.74878	6.17362
LOC201175	0.731526	3.84327	3.95935	0.000689379	0.0287494	-0.516127	3.47058	4.04248	3.65395	3.95041	3.81241	3.53106	4.3556	4.63282	4.37317	4.24777	3.85789	3.65339
UCK2	0.72918	6.31299	5.1388	4.02e-05	0.00426122	2.21489	5.71578	5.94429	6.00242	6.73797	6.77469	6.47225	6.52109	6.66829	6.66065	6.46452	6.0941	6.63064
LOC81691	0.726297	6.54756	4.90828	6.98e-05	0.00636161	1.68361	6.20023	6.37499	6.31523	6.4617	6.39753	6.54163	7.10604	6.95125	7.01204	6.98996	6.92537	6.50371
BRI3BP	0.725683	5.97993	5.14101	4e-05	0.00426122	2.21996	5.57559	5.47432	5.52591	6.13562	6.15174	6.32739	6.25409	6.24835	6.25043	6.19901	6.19575	6.15406
EPB41L3	0.723927	4.69813	4.25013	0.000341407	0.0184623	0.156782	3.79309	4.28635	4.18832	4.93993	4.96175	5.1265	4.89784	4.43237	5.10933	4.66798	4.52129	4.68675
PRIM1	0.723021	6.6345	3.67276	0.00137354	0.0438382	-1.17327	6.32097	6.5812	6.10296	6.85668	6.84205	6.65168	7.04315	7.09401	7.03703	6.25925	6.91311	7.10202
CDC2	0.722535	8.13994	3.66478	0.00140007	0.044165	-1.19145	7.64139	7.92313	7.74204	8.04943	8.05164	8.55227	8.76778	8.42926	8.27713	8.35646	8.63615	8.47802
NASP	0.720471	4.8819	3.90775	0.000780727	0.0308543	-0.634994	4.24676	4.76466	4.49328	4.70889	5.15453	5.21081	5.3496	5.13686	5.17966	5.09291	4.7046	5.0968
LHX4	0.72026	3.30008	4.03863	0.000569286	0.0254678	-0.3331	2.2189	3.15164	3.15617	3.58984	3.52991	3.53723	3.55759	3.62456	3.50535	3.39659	3.41946	3.62851
CCDC64	0.718424	6.65203	4.4296	0.000221208	0.0143232	0.573479	6.29612	6.37088	6.61807	6.68357	6.41576	6.67093	7.12092	7.20212	7.11731	7.19775	6.98696	6.61025
FANCG	0.717571	5.44358	4.11116	0.000477773	0.0230574	-0.165344	4.93694	5.36962	5.23674	5.53608	5.64663	5.29793	6.01373	5.8814	5.80089	5.42627	5.71681	5.83937
LRRN3	0.716273	4.37085	4.28684	0.000312404	0.0175095	0.241965	3.43641	4.04318	3.92313	4.6537	4.54622	4.95022	4.52498	4.7341	4.29246	4.44324	4.6949	4.35172
CCBL1	0.715241	4.20254	3.976	0.00066222	0.028108	-0.477711	3.43829	4.17002	3.93881	4.26721	4.45366	4.09386	4.67579	4.4936	4.52344	4.38582	4.40792	4.17515
TACC3	0.71438	6.78456	3.6518	0.00144427	0.0449825	-1.22099	6.02152	6.52868	6.82687	6.99065	6.67782	6.9931	7.22823	6.95481	7.33716	7.25352	6.84022	6.83871
CCNA2	0.713497	7.30967	3.76973	0.0010884	0.0370842	-0.951847	6.60995	7.10701	7.03578	7.30686	7.09191	7.78474	7.869	7.63452	7.3897	7.40599	7.72885	7.61676
C22orf18	0.710775	7.21697	3.66095	0.00141297	0.0444296	-1.20017	7.07858	6.89779	7.0042	7.56451	7.64845	6.90458	7.69428	7.53116	7.88746	7.1244	7.14729	7.25501
CASP7	0.708211	4.84824	3.85345	0.000889861	0.0324628	-0.759868	4.1548	4.77737	4.79329	4.82466	4.59379	5.20155	5.47529	5.12383	5.25097	4.6834	4.86409	5.07957
FAM54A	0.707986	3.81126	3.77556	0.00107325	0.0370384	-0.938497	3.00064	3.77102	3.74548	3.96199	3.96226	3.80856	4.12136	4.60636	3.91337	3.8099	3.83955	4.23184
BNIP3	0.706433	8.29707	5.08234	4.6e-05	0.00467033	2.08506	7.99472	8.34729	8.05182	7.79303	8.17318	8.15985	8.8609	8.81701	8.83522	8.51289	8.882	8.73228
PDXP	0.704754	5.9402	3.934	0.000732852	0.0298669	-0.574555	5.68523	5.52976	5.38624	6.39352	6.32121	6.05962	6.49821	6.09171	6.12558	6.29338	6.26675	5.86328
MRFAP1	0.704476	10.7469	3.65449	0.001435	0.0449785	-1.21487	9.94521	10.5824	10.5611	10.6067	10.5189	10.8282	11.2248	10.9536	11.0238	11.2583	10.8101	10.5748
C21orf63	0.703923	3.52204	4.78209	9.45e-05	0.00795122	1.3916	2.89202	3.46245	3.29687	3.68877	3.64242	3.65555	3.69823	4.08438	3.9805	3.75579	3.65259	3.724
PTGES	0.70321	6.86731	3.80106	0.00100942	0.0351495	-0.880076	6.05962	5.89725	6.02966	7.92721	7.76831	7.49687	6.65557	6.46218	6.9784	7.1551	6.55876	7.0952
HCAP-G	0.700291	6.70542	4.81395	8.76e-05	0.00755868	1.4654	6.33836	6.39747	6.26712	6.82304	6.81288	7.0786	6.92463	7.06164	7.11757	6.8271	7.26759	6.92519
KLF2	0.69921	4.34758	4.06786	0.000530474	0.0245979	-0.265526	3.83591	4.28502	3.95869	4.78182	4.47292	4.39051	4.78597	4.75893	4.63235	4.77072	4.53379	4.54554
CDCA8	0.697194	6.64928	4.55667	0.000162734	0.011413	0.868637	6.04259	6.47692	6.39778	6.98185	6.87933	6.66333	7.17972	6.88416	6.94499	6.81525	6.54323	6.73435
CHD1L	0.695707	4.7054	3.80619	0.000997049	0.0350607	-0.868322	4.01711	4.56602	4.56158	4.57793	4.56432	5.05734	5.24084	4.86232	5.12866	4.47006	4.45175	4.8393
CEP55	0.693318	7.2843	3.89879	0.00079778	0.0312819	-0.655623	6.56029	7.16149	7.00014	7.34474	7.10879	7.70559	7.71866	7.49999	7.58323	7.52894	7.61085	7.48454
NY-SAR-48	0.692116	4.46406	4.08802	0.000505247	0.0240551	-0.218883	4.35854	4.27626	4.09563	4.84743	4.85708	4.19338	4.81519	5.01407	4.97751	4.39995	4.56566	4.6798
TK1	0.687493	8.93216	4.3567	0.000263841	0.0155928	0.404164	8.86016	8.78525	8.8523	9.14883	9.05742	8.63016	9.38245	9.60491	9.57283	9.01852	9.07391	8.89509
IL20RA	0.687383	4.34824	4.25245	0.000339497	0.0184604	0.162166	4.32522	4.13728	4.17046	4.26966	4.13038	4.13533	4.81856	5.02295	4.85361	4.26474	5.20334	4.63071
FLJ25416	0.686418	5.59893	3.85443	0.000887771	0.0324628	-0.757625	4.84357	5.30376	5.41897	5.75414	5.59423	5.98511	6.03128	5.78955	5.80472	5.75613	6.03166	5.69875
BUB1B	0.685168	6.16271	3.88543	0.000823891	0.0314738	-0.686367	5.35666	6.08195	5.95328	6.29643	6.18003	6.33664	6.4281	6.4422	6.5771	6.244	6.46431	6.42289
PIK3R1	0.68507	5.23268	4.39212	0.000242187	0.0149912	0.486421	4.76865	5.10952	4.99839	5.0638	4.8202	5.4721	5.79281	5.39895	5.74001	5.50954	5.38327	5.41904
EZH2	0.68009	4.41156	4.2859	0.000313115	0.0175095	0.239785	4.09727	4.20302	4.24394	4.46294	4.70914	4.37463	4.50689	5.26801	4.80959	4.51817	4.66241	4.7566
TRPV4	0.680085	4.15128	4.04187	0.000564854	0.0253849	-0.325622	4.11252	4.2355	4.12134	4.00341	3.81518	3.79959	4.98983	4.7145	4.80529	4.32713	4.70544	4.06155
MCM5	0.676687	6.11257	3.94717	0.000709936	0.0293089	-0.544204	5.77099	5.78652	5.95079	6.43942	6.27691	6.11179	6.51944	6.33007	6.68885	6.2315	6.30577	6.18953
C1orf33	0.676613	5.06901	3.71761	0.00123351	0.0410142	-1.071	4.39053	4.86758	4.74029	5.43929	5.62409	5.06322	5.15746	5.58162	5.28917	5.17085	4.88226	5.03266
AHNAK	0.676582	4.46481	3.60648	0.00160963	0.0481521	-1.32394	4.6335	4.41366	4.15324	4.50354	4.69776	3.89676	4.97263	5.1342	5.12331	4.37903	4.46207	4.38609
DTL	0.672326	7.47603	4.58516	0.000151917	0.0111043	0.934814	7.05542	7.15401	6.98702	7.6812	7.50552	7.77251	7.6514	7.71106	7.85096	7.79778	7.79668	7.75965
PRAF1	0.66917	4.75886	4.32742	0.000283202	0.0164909	0.336166	4.20693	4.74544	4.37938	5.15684	5.07682	4.90674	5.05116	5.22315	5.06495	4.53447	4.95552	4.88351
TOMM40	0.660728	8.80181	3.70319	0.00127693	0.0419882	-1.10391	8.71549	8.34636	8.50536	8.99239	9.16446	8.93905	8.98858	9.34918	9.21164	9.2836	9.03416	8.67684
DUSP1	0.660241	6.01746	4.4893	0.000191485	0.0129082	0.712175	5.92016	6.11669	5.9226	5.59356	6.12426	5.9674	6.62651	6.78504	6.52862	6.47955	6.46558	6.26483
GMPS	0.656054	8.63874	3.88323	0.000828257	0.0314738	-0.691411	8.11611	8.44155	8.42008	8.9156	8.63956	9.05779	9.15691	8.79142	8.99758	8.57079	8.64751	8.88065
C9orf40	0.655631	4.39541	3.93207	0.000736264	0.0298669	-0.578992	3.81973	4.3408	4.13066	4.39404	4.41522	4.55734	4.8923	4.74367	4.62211	4.74308	4.89372	4.31514
LOC647000	0.651844	8.46249	3.76952	0.00108894	0.0370842	-0.952321	7.87491	8.19682	8.14477	8.66023	8.59015	8.91187	8.95695	8.51893	8.69616	8.44591	8.38235	8.67819
MLF1IP	0.646019	5.07603	4.86504	7.74e-05	0.00699234	1.58364	4.92289	4.71266	4.876	4.96527	5.1518	5.25375	5.43417	5.56994	5.44549	5.09754	5.44657	5.37856
WDR67	0.637045	5.05988	3.86438	0.000866741	0.0323123	-0.734752	4.57859	4.78199	4.80805	5.10293	5.17264	5.27178	5.41109	5.20004	5.46864	5.17259	5.65631	5.10047
ZWINT	0.633202	6.55539	3.75932	0.00111597	0.0378735	-0.975671	5.9216	6.27595	6.24045	6.59792	6.56902	6.77321	6.95149	6.81486	6.57126	6.56567	6.76806	6.95032
LOC652025	0.627977	11.5883	3.60844	0.00160211	0.0481521	-1.3195	11.0916	11.338	11.4032	11.6263	11.5811	11.9026	12.0517	11.8271	11.8381	11.9839	11.4971	11.6461
MYOHD1	0.626437	4.76893	3.98926	0.000641362	0.0275646	-0.447116	4.28276	4.61186	4.48596	5.11561	5.21034	4.78847	5.04269	5.03277	5.18442	4.542	4.78733	5.02257
AXUD1	0.623639	5.80075	3.63782	0.00149339	0.045788	-1.25277	6.00686	5.57361	5.75494	5.79399	5.61129	5.52166	6.54747	6.23232	6.42653	6.10772	5.89508	5.94785
HSPB8	0.622292	6.99784	3.80602	0.000997459	0.0350607	-0.868714	6.19451	6.28171	6.24626	7.96597	7.94136	8.10574	7.01177	6.68518	6.89242	7.46249	7.03532	6.9183
MGC24039	0.621801	2.98974	3.80054	0.0010107	0.0351495	-0.881283	2.2014	2.77091	2.46154	3.1239	2.97897	3.36545	3.23016	3.03898	3.03011	3.12364	3.1636	2.98541
ZMYND19	0.621376	7.41375	4.11863	0.000469217	0.0228615	-0.148036	7.19057	7.05478	7.03003	7.56663	7.67877	7.43864	7.71469	7.77331	7.6515	7.74043	7.34604	7.18023
GSG2	0.619381	3.60212	4.18286	0.000401725	0.0208094	0.000767836	2.892	3.47432	3.45229	3.73986	3.83855	3.78772	3.98874	3.68531	4.0027	3.67637	3.87599	3.72914
ELOVL3	0.618246	3.42094	4.04976	0.000554191	0.0251352	-0.307385	2.65846	3.41197	3.44659	3.39531	3.5482	3.40962	3.80877	3.74533	3.81766	3.35442	3.16551	3.43861
FAM46B	0.615996	7.85873	4.2903	0.000309801	0.0175095	0.249996	7.92535	7.87209	7.89529	7.60439	7.76742	7.299	8.46542	8.57102	8.50427	8.08066	8.16371	7.97077
LAMA3	0.61489	4.80404	3.90753	0.000781154	0.0308543	-0.635515	4.34262	4.44255	4.47128	4.52727	4.41236	4.85587	5.18964	5.02112	4.89036	4.93675	4.89988	4.81922
LAD1	0.61464	6.72347	4.32502	0.000284846	0.0164909	0.330608	6.34673	6.42084	6.51625	6.75148	6.81181	6.87455	7.07207	7.01483	7.04084	7.21091	7.11767	6.76273
FAH	0.613406	7.11882	4.10959	0.000479585	0.0230574	-0.168969	7.03573	7.11002	6.99703	6.97662	7.06817	6.55821	7.63873	7.55237	7.7919	7.33435	7.2627	7.20123
C15orf42	0.61186	3.57396	4.61506	0.000141343	0.0106191	1.00423	3.04348	3.48757	3.37009	3.69605	3.59187	3.76351	3.96226	3.74637	4.0281	3.67408	3.71999	3.65366
KLF9	0.609077	4.57853	4.7826	9.44e-05	0.00795122	1.3928	4.41296	4.83851	4.6854	4.12738	4.09716	4.28025	5.18144	5.30934	5.27332	4.72689	4.86094	4.58366
DDX39	0.601851	9.60031	4.16932	0.000415098	0.0211359	-0.0306198	9.44369	9.37637	9.22122	9.81473	9.82844	9.68261	9.87897	10.0546	9.91328	10.0925	9.89945	9.44973
CARD10	0.601729	4.31409	3.59641	0.00164885	0.0491758	-1.34679	3.57592	3.90264	4.19557	4.72323	4.66385	4.58884	4.35108	4.59187	4.53638	4.73168	4.68302	4.189
HYLS1	0.593811	6.98867	3.75346	0.00113178	0.0381472	-0.989071	6.59839	6.99451	6.66165	7.11928	7.15857	7.25253	7.24523	7.42089	7.36986	6.66305	7.12781	7.33545
ADD3	0.587901	5.50799	3.95939	0.000689313	0.0287494	-0.516036	5.33636	5.67158	5.50209	4.80483	4.94468	5.33234	6.08901	6.12336	6.06137	5.97472	6.17597	5.81319
BLM	0.587572	3.98996	3.60692	0.00160795	0.0481521	-1.32295	3.60712	4.02149	3.7056	4.16065	4.08271	4.13027	4.20773	4.69363	4.19556	4.17259	4.30069	3.93102
C18orf24	0.583317	4.10863	4.22484	0.000362947	0.0191023	0.098098	3.67858	3.86958	3.8903	4.12495	4.03162	4.36161	4.24266	4.34907	4.59669	4.12331	4.21941	4.57781
MKI67	0.57798	3.68531	4.08746	0.000505935	0.0240551	-0.220187	3.25113	3.54088	3.48286	3.89392	3.71146	3.71912	3.95856	4.03049	4.01976	3.84151	3.38686	3.77103
FLJ20105	0.575084	5.17177	4.27441	0.000321937	0.0179012	0.21312	4.59779	5.13827	4.86313	5.38094	5.01302	5.2602	5.35369	5.33423	5.63652	5.45032	5.33002	5.47795
ELF4	0.574793	4.66324	3.67056	0.0013808	0.0438382	-1.17828	4.35063	4.35601	4.27055	4.82284	4.90415	4.5487	4.80918	4.97072	4.92167	4.85742	4.84644	4.70296
C13orf3	0.574582	4.16012	4.109	0.000480265	0.0230574	-0.170326	3.70898	4.09139	3.85108	4.20439	4.00335	4.48051	4.62161	4.21392	4.53966	4.51499	4.55321	4.2695
MPHOSPH1	0.567807	7.03276	3.85159	0.000893865	0.0324628	-0.764151	6.62014	6.70227	6.86586	7.24275	6.95345	7.35935	7.2036	7.15189	7.53621	7.29802	7.1382	7.08521
FLJ20920	0.552745	4.291	4.27055	0.000324955	0.0179675	0.204166	4.19129	4.35806	4.34401	4.17005	4.3327	3.91645	4.97933	4.72775	4.84452	4.22356	4.08457	4.13149
RFC2	0.551739	3.95257	3.62513	0.00153944	0.0470535	-1.28161	4.15315	3.68122	3.74702	4.07132	3.84362	3.92494	4.24005	4.60594	4.39062	4.10783	3.76657	4.05011
KCNMA1	0.54767	3.82771	3.60711	0.00160721	0.0481521	-1.32251	3.62559	3.99089	3.84456	3.54499	3.5214	3.64009	4.17349	4.65046	4.2801	3.96458	3.99617	3.8115
FAM46C	0.546235	3.75508	4.53648	0.000170864	0.0117745	0.821745	3.31059	3.51878	3.46854	3.61693	3.78651	3.79191	3.89674	3.96237	4.07751	4.09055	3.91979	3.77095
SPINK5L3	0.545511	3.27066	3.77438	0.0010763	0.0370384	-0.941204	2.76128	3.16824	2.91412	3.47167	3.41525	3.44555	3.56482	3.45228	3.46307	3.08033	3.39145	3.29622
TMEM109	0.531656	8.84323	3.62179	0.00155179	0.047284	-1.2892	8.42887	8.71768	8.73523	9.03608	8.94368	8.9725	9.21829	9.03008	9.22838	9.06561	8.7663	8.68964
FHL3	0.524999	3.52285	3.88504	0.000824654	0.0314738	-0.68725	3.07445	3.40185	3.46559	3.56347	3.70197	3.55695	3.66702	3.89426	3.9556	3.67855	3.81118	3.8073
STRBP	0.514544	5.61187	3.65248	0.00144191	0.0449825	-1.21944	5.42785	5.45885	5.29265	5.48673	5.65285	5.72707	5.78724	6.00335	5.93241	5.7707	6.12442	5.85662
DKC1	0.506533	6.94466	3.88765	0.00081948	0.0314738	-0.681243	6.43751	6.54806	6.66701	7.3314	7.16065	7.35294	7.00517	6.90864	7.25838	6.69819	6.82657	7.0039
MYADM	0.494627	4.88206	3.81947	0.000965703	0.0341887	-0.837871	4.51474	4.77066	4.48818	4.88131	5.09921	4.87014	5.15387	4.99529	5.1083	5.08388	5.05315	4.95316
MGC24665	0.493589	7.83925	3.91618	0.000765025	0.0305568	-0.615592	7.43626	7.66814	7.74642	7.99714	7.84147	7.91309	8.21797	8.05373	8.05989	8.16464	7.9012	7.97477
FLJ22624	0.49094	5.23818	3.707	0.0012653	0.0419295	-1.09521	5.12114	5.14622	4.84394	5.35409	5.39034	5.42096	5.48025	5.57699	5.52687	5.03125	5.42843	5.45605
RPA2	0.476181	5.55483	3.68057	0.00134809	0.0433828	-1.15549	5.41735	5.46941	5.27034	5.75903	5.60214	5.47875	5.85526	5.86647	5.86392	5.72415	5.6236	5.61094
LCP1	-0.42094	3.2275	-3.72498	0.00121188	0.0404316	-1.05417	3.50756	3.44207	3.24613	3.26008	3.10213	3.26372	3.06872	2.86927	2.99494	3.34242	3.18835	3.18132
BBS4	-0.435274	5.63807	-4.03421	0.000575396	0.0256246	-0.343313	5.7664	5.79643	5.98465	5.4793	5.53101	5.376	5.44438	5.49553	5.30175	5.50996	5.5313	5.60896
YIPF1	-0.46341	6.68492	-3.74451	0.00115638	0.0388435	-1.00955	6.64008	7.01187	6.85397	6.71585	6.84898	6.63964	6.43655	6.30214	6.377	6.47572	6.47041	6.76139
NEK6	-0.473118	4.15718	-3.7367	0.00117828	0.0394442	-1.0274	4.26578	4.39444	4.35775	4.16075	4.38404	4.17906	3.93303	3.57192	4.09367	4.12414	3.90409	4.10185
GRAMD3	-0.480245	6.63964	-3.84847	0.0009006	0.0325871	-0.771311	6.89175	6.94795	6.86194	6.44933	6.55663	6.46642	6.25472	6.49634	6.50985	6.63415	6.94059	6.55377
DISP1	-0.499753	3.76945	-3.93243	0.000735623	0.0298669	-0.57816	3.75373	3.81029	3.77827	3.61651	3.63135	3.687	3.28354	3.16697	3.39252	3.70451	3.71729	3.86666
C1orf115	-0.525161	4.82245	-3.70487	0.00127178	0.0419882	-1.10007	4.81644	5.12085	5.13808	4.81355	4.79253	4.83427	4.46549	4.36123	4.67317	4.51059	4.4354	4.49061
MSRB3	-0.525344	4.06694	-4.04542	0.000560031	0.0252836	-0.317417	4.16374	4.35555	4.10464	3.91311	3.95204	4.27223	3.68821	3.67059	3.6891	3.96107	3.99493	3.92115
LOC388389	-0.55798	4.10867	-3.97464	0.00066441	0.028108	-0.480867	4.56338	4.33075	4.30177	3.88624	4.01224	3.8892	4.0138	3.53846	3.9697	4.0533	3.99875	4.09503
ZNF277	-0.565611	4.37417	-3.64526	0.00146705	0.0454048	-1.23586	4.57044	4.88425	4.52971	4.21075	4.1967	4.18236	4.19417	4.06557	4.02783	4.23247	4.5778	4.53549
ANXA3	-0.56573	3.88122	-3.63959	0.00148709	0.045788	-1.24875	4.12352	4.37914	3.89964	4.01839	3.69096	3.99691	3.52144	3.61449	3.5692	3.77172	3.95613	3.87393
ISGF3G	-0.574206	3.69831	-3.59098	0.00167038	0.0496672	-1.3591	4.16233	3.96018	3.78786	3.48881	3.55223	3.5554	3.45059	3.30292	3.43424	3.57097	3.52619	3.7652
PCMTD1	-0.579786	5.21251	-3.69832	0.00129193	0.0422369	-1.11502	5.63852	5.47652	5.50416	4.8335	4.76034	5.10338	4.8028	5.09559	4.98145	5.0316	5.51865	5.12976
OSBPL7	-0.585699	4.17579	-4.40006	0.000237579	0.0148199	0.504874	4.34229	4.44507	4.45807	3.90364	3.86424	4.07303	3.75852	3.97043	3.75939	3.99224	4.40583	4.06355
RAI14	-0.592794	4.71507	-3.89487	0.000805357	0.0314537	-0.664648	4.99519	4.63451	4.81288	4.96386	4.98135	4.92337	4.04863	4.49953	4.11604	4.82618	4.80077	4.58743
C21orf51	-0.602019	4.43087	-3.69699	0.00129603	0.0422369	-1.11804	4.29486	4.88266	4.66672	4.10731	4.34082	4.54238	3.9638	4.12491	3.94948	4.06838	4.05964	4.37032
NUMB	-0.603773	6.09442	-4.08063	0.000514359	0.0242216	-0.235995	6.39705	6.53166	6.21837	5.85111	5.9533	6.18096	5.77888	5.86984	5.68704	5.75245	5.99247	5.96819
GLS	-0.626152	4.21915	-3.99339	0.000635011	0.027509	-0.437602	4.52803	4.52079	4.53298	4.2662	3.71637	4.15568	4.01816	3.70714	3.97806	4.05689	4.10609	4.05312
C12orf26	-0.629217	4.05843	-3.91694	0.000763622	0.0305568	-0.613838	4.43391	4.40131	4.28511	3.89088	3.64048	3.98865	3.90658	3.7854	3.54069	4.02046	4.21426	3.82264
LRRN5	-0.634375	3.39701	-4.06993	0.000527826	0.0245979	-0.260737	4.00622	3.61549	3.26622	3.34652	3.40651	3.21769	3.02491	2.98976	2.97013	3.20228	3.33578	3.27522
FZD4	-0.642483	6.18232	-4.66545	0.000125171	0.00976755	1.12118	6.39438	6.53487	6.48113	5.81431	5.72522	6.12107	5.82557	5.80396	5.8534	6.03764	6.00558	5.8613
TCF7L1	-0.645781	3.47424	-3.6908	0.00131543	0.0427276	-1.13217	3.43057	3.85584	3.72704	3.37341	3.64355	3.46117	3.29074	2.50458	3.28079	3.25237	3.1793	3.28645
CASC1	-0.651295	4.29611	-4.16198	0.000422527	0.0211702	-0.0476199	4.42992	4.88708	4.65394	4.12969	3.77048	4.05371	3.93655	3.94678	4.13372	4.03042	4.58364	4.18562
ARL4D	-0.65547	3.7965	-5.32415	2.59e-05	0.00324957	2.63942	4.21286	4.49273	4.31664	3.4337	3.63325	3.46035	3.69391	3.60956	3.75235	3.58005	3.78381	3.67582
PPT1	-0.684485	8.61504	-3.63801	0.00149274	0.045788	-1.25235	8.43353	9.26053	9.03308	8.41108	8.3785	8.83366	8.12063	8.26812	8.28494	8.67852	8.72491	8.59381
LOC88523	-0.689108	4.60316	-3.80365	0.00100315	0.0351354	-0.874141	4.78461	5.18111	4.99813	4.27704	3.99251	4.37638	4.44369	4.10096	4.35187	4.483	4.70499	4.20593
HIST1H2BD	-0.695367	7.45927	-3.6088	0.00160075	0.0481521	-1.31869	7.45621	7.88903	7.87055	7.51821	7.32916	7.43736	7.15214	6.72218	7.25535	7.22918	7.14216	7.43181
FZD2	-0.699594	5.4924	-3.70223	0.00127987	0.0419882	-1.1061	5.57601	5.99142	5.98631	5.58585	5.21939	5.39627	5.45364	4.77223	5.22908	5.76731	5.38322	5.09548
LOC150084	-0.700051	5.1073	-4.74395	0.000103606	0.00849741	1.30324	5.20989	5.45522	5.13561	5.57464	5.36985	5.21175	4.46686	4.57105	4.66266	4.92928	4.97524	5.08385
MGC42367	-0.704297	4.04715	-4.60657	0.000144269	0.0107568	0.984515	4.30896	4.59643	4.4805	3.86804	3.81879	4.05687	3.65768	3.76709	3.84824	3.87359	4.03018	3.89266
DLL1	-0.707665	4.41367	-3.93142	0.000737417	0.0298669	-0.580488	4.6098	4.87077	4.99198	4.37199	4.0025	4.4917	4.32767	4.27944	3.74245	4.39275	4.6251	4.24005
KYNU	-0.714134	8.04989	-4.47401	0.000198694	0.0133031	0.676645	8.1417	8.68625	8.47177	7.67357	7.72561	7.9595	7.68884	7.80983	7.65865	7.75584	8.28573	7.92417
SLC35A1	-0.715322	7.81506	-3.82243	0.00095885	0.0340686	-0.83108	7.78087	8.35544	8.16247	7.44632	7.31811	8.02696	7.50827	7.31349	7.33106	7.58934	7.93347	7.67185
ARHGEF6	-0.716838	4.28585	-3.64575	0.00146531	0.0454048	-1.23473	4.27429	4.77109	4.60118	4.20059	3.72143	4.46006	3.85514	3.70602	3.93488	4.3008	4.26612	4.02765
GPR81	-0.726151	4.21907	-4.07562	0.000520627	0.0244	-0.24759	4.32293	4.6204	4.88627	3.88188	3.86254	4.24675	4.02221	3.39892	4.23002	4.30931	4.18764	4.13958
FEZ1	-0.727755	4.69835	-4.56166	0.000160785	0.0113845	0.880228	5.1478	5.12356	4.97373	4.76078	4.67634	4.3958	4.30706	4.36235	4.39242	4.59786	4.92283	4.29992
CYB5A	-0.728647	9.12235	-4.23553	0.000353678	0.018918	0.12291	9.13121	9.46126	9.53416	9.24242	9.15539	9.37347	8.63198	8.57996	8.72874	8.59205	9.05053	9.08911
CITED2	-0.739969	6.74234	-3.84339	0.000911685	0.0328674	-0.78298	6.77674	7.44871	7.44159	6.50626	6.41245	6.56669	6.49943	6.28466	6.66304	6.73517	6.84334	6.39326
RWDD2	-0.740392	4.50343	-4.14112	0.000444391	0.0217597	-0.0959629	4.66363	5.01118	4.93806	4.43506	4.44036	4.25196	4.07346	4.08391	4.23432	4.19587	4.83404	4.29842
SC5DL	-0.754855	7.2099	-4.51239	0.000181097	0.0122921	0.765811	7.41534	7.67637	7.57729	6.98858	6.95442	7.38467	6.63013	7.04546	6.72883	6.87136	7.46496	7.06533
PUNC	-0.765511	3.50534	-4.53596	0.000171079	0.0117745	0.820541	4.09997	3.81428	3.53089	3.65178	3.78429	3.23439	3.20773	2.79739	3.14348	3.67065	3.46821	3.28587
LOC401052	-0.770257	4.13826	-5.60515	1.34e-05	0.00202363	3.27747	4.56116	4.61762	4.40356	4.24083	3.90207	3.83584	3.90059	3.58969	3.78129	4.02799	3.95478	4.09039
TGFB3	-0.777809	7.11621	-4.65544	0.000128229	0.00985958	1.09795	7.41202	7.33816	7.76901	6.93442	6.6804	7.21713	6.85044	6.51407	6.82126	6.90922	6.79229	7.04043
TIGA1	-0.778891	7.63302	-4.0664	0.000532346	0.0245979	-0.268897	7.64853	8.07123	7.94901	7.75768	7.58209	7.542	7.21736	6.8435	7.27124	7.15727	7.64145	7.6091
C21orf34	-0.78398	4.28844	-3.85304	0.000890747	0.0324628	-0.760818	4.96329	4.8439	4.58885	4.32056	4.38247	3.8371	3.79248	4.0021	4.24952	3.84702	4.07551	4.19508
GPR56	-0.788826	8.04935	-3.86922	0.000856691	0.0320591	-0.723624	7.87157	8.50468	8.57266	7.80699	7.77777	8.28083	7.49023	7.46122	7.63098	7.95283	8.29999	7.49604
FLJ37266	-0.792796	5.04995	-4.08375	0.000510497	0.0241553	-0.22878	4.90206	5.68482	5.61873	4.47173	4.74302	4.94782	4.77076	4.28986	4.7666	4.86586	5.17234	4.73413
PMP22	-0.795431	5.54894	-4.40656	0.000233877	0.0147743	0.519965	5.31341	6.16284	5.63663	5.77788	6.03694	5.43708	4.94973	4.77724	4.99962	5.31068	5.37555	5.5154
TESK2	-0.799252	4.175	-3.82628	0.00095	0.0338764	-0.822239	4.12465	4.79274	4.7911	3.92404	3.5077	4.0735	3.80285	3.76947	3.73841	3.78011	4.34059	3.94093
EFNB2	-0.800397	3.69526	-4.15433	0.000430423	0.0211811	-0.0653617	3.64262	4.25143	4.0565	3.28711	3.3494	3.60438	3.28957	2.90734	3.35247	3.60781	3.67465	3.79491
FAM113B	-0.801308	3.66867	-5.87949	7.06e-06	0.00128638	3.89274	4.3022	4.1495	4.19243	3.67271	3.52194	3.23524	3.31559	3.64349	3.28113	3.49065	3.48069	3.52875
PREX1	-0.816382	4.66253	-3.82695	0.000948481	0.0338764	-0.820714	4.59661	4.95275	5.20456	4.85444	4.59878	4.78931	4.40953	3.72287	4.17237	4.67255	4.24976	4.0091
FAM43A	-0.818121	4.34267	-4.44642	0.00021239	0.0140292	0.612572	5.22536	4.70103	4.58174	3.96677	3.92311	3.99296	3.98504	4.36733	3.7014	4.25923	4.38555	4.25999
CDR2L	-0.834514	4.18413	-5.32121	2.61e-05	0.00324957	2.63272	4.49787	4.47797	4.85344	4.08218	3.92437	3.92121	3.8352	3.54236	3.94818	4.17399	4.22188	4.11434
ADM	-0.841218	6.88477	-5.82703	7.97e-06	0.00140064	3.77573	7.02783	6.97815	6.74405	7.42202	7.45379	7.40359	6.26912	5.89832	6.05893	6.88385	6.48726	6.6559
SALL2	-0.845744	3.50152	-6.19525	3.42e-06	0.000696306	4.59023	3.96658	3.94219	3.85545	3.36351	3.41315	3.16749	2.97368	3.12596	3.12734	3.38332	3.49161	3.3166
CREB3L4	-0.849828	6.59788	-5.12527	4.15e-05	0.00430451	2.18379	6.81947	7.08369	7.24022	6.49655	6.53501	6.34894	6.19092	6.08623	6.31674	6.39195	6.37143	6.70418
FSTL1	-0.866132	6.87196	-4.05176	0.000551513	0.0251296	-0.30275	6.59191	7.44421	7.22041	6.77359	6.74301	7.12008	6.22307	6.19824	6.23682	6.71551	6.98654	6.47936
C6orf165	-0.867765	4.24759	-6.61008	1.34e-06	0.000357564	5.48723	4.48857	4.81873	4.75699	3.87374	4.0227	4.205	3.80937	3.95575	3.69588	4.01719	4.22408	4.03317
ABCC5	-0.869783	5.6281	-3.85481	0.000886944	0.0324628	-0.756736	6.21184	5.78941	5.69185	5.33459	5.15963	5.68156	5.13561	4.9979	4.95024	5.29099	5.88685	5.69508
MATN2	-0.883807	5.95083	-4.53244	0.000172536	0.0117923	0.812383	6.32643	6.62066	6.32973	5.7024	5.68449	5.83978	5.58831	5.74973	5.28736	5.655	6.4746	5.69226
UNG2	-0.888987	8.49197	-5.8612	7.36e-06	0.00131757	3.85199	8.56489	8.98204	9.07178	8.24335	8.19652	8.42857	7.97956	7.99425	7.97793	8.53653	8.99517	8.47703
TMEM45B	-0.926891	5.54238	-4.23176	0.000356917	0.018988	0.114166	5.70582	5.90264	5.80709	5.43207	5.08937	5.38269	5.44469	4.45598	4.73421	5.71742	5.60445	5.87517
LUM	-0.9439	3.61405	-4.16079	0.000423748	0.0211702	-0.0503848	3.16799	4.63223	4.16912	3.53571	3.46319	3.67996	3.21272	2.85374	3.07118	3.52287	3.56859	3.68358
MGC26718	-0.947519	4.79127	-3.78613	0.00104633	0.0362605	-0.914296	4.85508	5.52736	5.21006	4.31499	4.2398	5.0788	4.64227	3.964	4.14367	4.4274	5.00336	5.12335
BAMBI	-0.993653	8.8921	-7.85748	9.28e-08	4.22e-05	8.03766	9.29813	9.68625	9.55168	8.61104	8.56953	8.68151	8.55928	8.46176	8.53405	8.80228	8.98172	8.68133
EVI1	-1.00203	3.62891	-6.2252	3.19e-06	0.000668957	4.65573	4.41144	4.16659	4.03373	3.10814	3.40357	3.59481	3.16115	3.28301	3.16149	3.52065	3.64393	3.51358
IGSF3	-1.02337	6.83908	-4.70763	0.000113075	0.00904784	1.21902	6.79128	7.35995	7.2994	6.4612	6.31075	7.39084	6.08498	6.02494	6.27061	6.89442	6.94717	6.79771
RAB26	-1.02584	4.49973	-4.81697	8.69e-05	0.00755868	1.4724	4.96867	5.15203	5.20705	3.91434	3.97147	3.93179	4.09042	4.16428	3.99552	4.2845	4.88215	4.09728
C10orf33	-1.03477	4.36914	-6.1207	4.05e-06	0.000782252	4.42665	5.00241	4.84104	4.89878	3.79924	3.94007	3.95143	3.78628	4.0278	3.82386	4.03115	4.23275	4.27537
NDP	-1.04625	3.84526	-6.25528	2.98e-06	0.000638364	4.72143	4.26793	4.78332	4.69866	3.58505	3.51988	3.54578	3.81163	3.05698	3.74257	3.72331	3.84724	3.82037
C1orf116	-1.05074	3.88217	-4.35554	0.000264581	0.0155928	0.401476	3.88381	3.22241	3.56093	3.42287	2.98669	3.83401	2.86783	1.86882	2.77828	3.47597	3.66395	3.64477
CCL2	-1.07795	3.38931	-6.92055	6.78e-07	0.000215218	6.14317	4.18133	3.7515	3.99596	3.28484	3.54909	3.25071	3.01273	2.66221	3.02	3.04044	3.24863	3.41298
OLR1	-1.1184	5.14732	-6.07509	4.5e-06	0.000851594	4.32623	4.71508	5.65896	5.38967	4.96023	5.15425	5.49636	4.26636	4.01098	4.13119	4.92835	5.00259	4.87396
ABCG1	-1.1613	4.35399	-6.29485	2.73e-06	0.000596571	4.80766	4.45217	5.00114	5.19483	4.18738	3.68883	4.42113	3.8766	3.53089	3.75675	4.13169	4.33939	4.44263
IRXL1	-1.37243	4.33772	-7.23899	3.4e-07	0.000119628	6.80161	4.67438	5.00895	4.89898	4.3733	4.32387	4.69747	3.82297	2.92592	3.71615	4.12181	4.52498	4.18641
C1orf64	-1.57354	4.49107	-9.47522	3.94e-09	2.98e-06	11.0015	5.40001	5.35702	5.33984	4.35396	4.40457	3.8479	3.88814	3.64595	3.84216	4.19909	4.08623	4.31212
CBLN2	-1.63022	4.78002	-10.7701	3.96e-10	5.85e-07	13.1057	5.2741	5.85742	5.80614	4.46196	4.48561	4.61736	4.019	4.04551	3.98251	4.41776	4.597	4.61699
B. GENES SIGNIFICANTLY REGULATED BY E2 IN COMPARISON TO VC (adj. P < 0.01) IN T-47D CELLS
ID	logFC	AveExpr	t	P.Value	adj.P.Val	B	VCx1	VCx2	VCx3	E2x1	E2x2	E2x3	P4x1	P4x2	P4x3	E2+P4x1	E2+P4x2	E2+P4x3
CXCL12	3.35118	4.79272	18.5814	9.84415e-15	9.68862e-11	22.0373	3.07275	3.22541	3.47314	6.58135	6.37701	6.86649	4.74093	4.72046	4.52279	4.64645	4.96868	4.54475
OLFM1	2.32209	7.09817	12.4108	2.8159e-11	9.23804e-08	15.4884	5.72944	5.96676	6.21112	8.16664	8.07028	8.63666	7.29771	6.62287	7.10112	7.5419	7.52051	7.23044
CLIC6	2.13516	6.93154	11.132	2.15932e-10	4.13555e-07	13.6719	4.9734	5.64774	5.6892	7.58736	7.38938	7.73908	7.56605	7.55324	7.72065	7.38201	7.8366	7.26248
STC2	2.10704	8.08915	9.0075	9.47847e-09	5.83045e-06	10.1924	6.46612	7.04134	7.13847	8.77763	8.64865	9.54077	7.71971	7.28502	7.87544	8.09941	8.16292	8.05237
SERPINA6	2.07827	8.37999	12.634	2.00577e-11	9.23804e-08	15.7863	7.62155	7.50101	7.37103	9.45999	9.67414	9.59426	7.63094	7.98947	7.81695	8.16019	8.03111	8.66246
ACOX2	2.0165	4.33759	11.0389	2.52116e-10	4.13555e-07	13.5319	3.52833	3.60052	3.56189	5.69727	5.67468	5.36828	4.06437	4.16725	3.91788	4.02606	4.43927	4.41207
SUSD3	1.96894	3.56923	10.2412	9.88599e-10	8.84526e-07	12.2873	2.50452	2.92735	2.82714	4.88566	4.91637	4.36379	3.26133	2.6501	3.63043	3.52405	3.70383	3.69515
MYC	1.95111	5.39694	7.98446	7.15083e-08	2.81514e-05	8.28873	3.84335	4.43418	4.54868	6.10577	5.99766	6.57611	6.03391	5.31676	5.46015	5.72306	5.99696	5.55652
MAP6D1	1.79416	8.25811	7.6109	1.54823e-07	5.64357e-05	7.55473	7.24338	7.65134	7.71558	9.19478	9.02758	9.77043	7.99695	7.46052	7.57216	8.48934	8.49377	7.85616
HSPB8	1.76353	6.99784	10.786	3.85862e-10	5.42522e-07	13.1462	6.19451	6.28171	6.24626	7.96597	7.94136	8.10574	7.01177	6.68518	6.89242	7.46249	7.03532	6.9183
PTGES	1.73529	6.86731	9.37976	4.69842e-09	3.08279e-06	10.8471	6.05962	5.89725	6.02966	7.92721	7.76831	7.49687	6.65557	6.46218	6.9784	7.1551	6.55876	7.0952
RAPGEFL1	1.69142	5.48604	9.52797	3.57032e-09	2.70301e-06	11.1023	3.88501	4.73758	4.87837	6.21608	6.10078	6.25836	5.59569	5.81299	5.8604	5.86678	5.94398	5.64497
MYB	1.68895	4.49025	6.50988	1.68099e-06	0.000424213	5.27198	3.28266	4.16062	3.85008	5.32605	5.38452	5.64966	4.32819	3.17729	4.12748	4.52945	4.5065	4.39999
THBS1	1.67589	6.64846	3.79716	0.00101894	0.0482531	-0.896721	5.57424	5.3855	5.51487	6.95561	6.65291	7.89375	7.01098	5.62108	6.19667	7.1384	6.99818	6.82392
NDRG1	-1.6572	6.44067	-9.39639	4.55527e-09	3.08279e-06	10.8759	6.85589	6.8977	6.74194	5.17382	5.30346	5.04665	7.94172	7.94986	7.79895	6.87161	7.45552	6.64165
FGD3	1.64306	4.22145	10.4879	6.42994e-10	6.32834e-07	12.681	3.6407	3.36728	3.59972	5.2148	5.20009	5.12198	3.8411	3.51408	3.54488	4.57968	4.51203	4.07111
GREB1	1.62591	5.52848	5.07159	4.72254e-05	0.00588345	2.0555	4.04793	4.58141	4.646	5.85728	5.76177	6.53401	5.7309	5.38649	5.55361	5.99848	5.46282	5.72626
KCTD6	1.59024	4.25635	8.08111	5.87324e-08	2.40852e-05	8.47524	3.35054	3.74499	3.52788	5.10412	4.98602	5.30399	3.92937	3.29767	3.92044	3.91167	4.63348	4.59126
CMTM7	1.55047	7.15335	11.4193	1.34672e-10	3.31361e-07	14.097	6.20351	6.09774	6.11898	7.87869	7.69822	7.49473	7.64253	7.42301	7.64459	7.56875	7.27285	7.42025
GJA1	1.51149	4.70129	6.54477	1.55487e-06	0.000402712	5.34695	3.00377	4.08735	3.80469	4.98612	4.99957	5.44458	5.05045	5.11726	5.2089	4.74133	5.43515	5.27622
RUNX1	1.50641	5.22713	10.6066	5.24048e-10	5.75443e-07	12.8676	4.11678	4.30546	4.29464	5.87351	5.47518	5.88743	5.81871	5.71004	5.85489	5.53407	5.45418	5.01923
LOC647784	1.49111	6.82002	5.37598	2.29139e-05	0.00352374	2.75363	6.34824	6.40657	6.31692	7.89912	7.86133	7.78459	6.28575	5.80845	6.45572	5.89938	6.31228	7.27859
KIAA1622	1.43965	4.68346	5.1844	3.60915e-05	0.00480018	2.31504	3.06603	4.57897	4.16946	5.14347	5.17092	5.81903	4.05887	3.83262	3.91985	4.71545	4.6943	4.73514
SFXN2	1.42959	5.4227	8.85408	1.27224e-08	6.9563e-06	9.91681	4.68487	4.79842	4.86618	6.18559	6.36751	6.08514	5.2304	5.79485	5.5827	5.28122	5.30878	5.52296
SEMA6A	1.41544	3.99942	10.6042	5.26212e-10	5.75443e-07	12.8639	3.41497	3.42133	3.43115	4.76508	4.72245	5.02622	3.85827	3.67236	3.73533	4.14971	3.95959	3.86607
FHL2	1.4034	7.43498	9.75786	2.34453e-09	1.92291e-06	11.4919	6.84616	6.92275	6.76949	8.29708	8.17458	8.27694	7.02041	7.38747	6.93559	7.26678	7.22354	7.62253
IGSF4	1.39212	5.12091	4.96949	6.02835e-05	0.00714832	1.81991	4.1102	4.42046	4.65254	5.50014	5.45999	6.39944	4.79263	4.56445	4.81729	5.09067	5.0913	5.19426
CD44	1.38258	5.54009	6.41273	2.09044e-06	0.000514353	5.06233	4.16	5.1141	4.74654	5.99725	5.90747	6.26365	6.12888	5.91422	6.25298	6.02894	6.066	5.72149
KCNF1	1.36479	4.61444	6.9244	6.722e-07	0.000200478	6.15188	4.29817	3.87273	3.939	5.55704	5.59438	5.05285	4.79156	4.87717	4.67112	5.26943	4.87182	4.85088
SIAH2	1.34577	5.31827	8.54298	2.33262e-08	1.06824e-05	9.34726	4.49314	4.85626	4.63199	5.99454	6.04387	5.98028	5.44199	4.90332	4.9639	5.49786	5.19334	5.2994
ADAMTSL5	1.3108	3.69793	8.81858	1.3625e-08	7.05777e-06	9.85253	2.86464	3.17909	3.28258	4.26853	4.27942	4.71075	3.39632	3.41864	3.49504	3.63069	3.75383	3.57983
GNG11	1.30863	7.86162	5.08478	4.57613e-05	0.00577414	2.0859	7.09256	7.37815	7.60703	8.78832	8.45453	8.7608	7.52575	6.22285	7.15632	7.13495	7.55835	7.99177
PUS7	1.30198	4.99134	5.3577	2.3926e-05	0.00362276	2.71191	3.9323	4.55345	4.33034	5.56177	5.21426	5.94599	4.90744	4.69875	4.89003	4.6875	5.16492	5.09848
FBXO32	-1.29913	7.67661	-8.91145	1.13924e-08	6.59553e-06	10.0203	7.70664	8.29068	8.31557	6.7982	6.88241	6.7349	8.64118	8.48676	8.40199	7.73752	7.89966	7.57435
CTPS	1.29592	5.00934	6.26251	2.9351e-06	0.000671796	4.73571	3.66322	4.61764	4.50272	5.46979	5.48192	5.71964	5.53502	5.35533	5.16003	5.02713	5.4496	5.20395
ISG20L1	1.28106	5.61342	4.745	0.000103346	0.0103789	1.30002	4.1246	5.23361	5.13896	6.09665	5.88601	6.35768	6.09655	5.36611	5.55092	5.93466	5.61173	5.85112
TPBG	1.21892	4.42474	4.5131	0.000180787	0.0149026	0.76128	3.07516	4.20845	4.19741	5.04974	4.73756	5.35049	3.8936	3.96505	3.93261	4.90579	5.05293	4.24707
RBM24	1.21846	4.12088	7.01062	5.57087e-07	0.000173063	6.33183	2.96785	3.66837	3.59484	4.60109	4.47625	4.80909	4.40005	4.17044	4.18219	4.27523	4.49026	4.56343
RARA	1.21792	6.01497	5.90516	6.65134e-06	0.0013638	3.94735	5.27964	5.42716	5.93171	6.59078	6.60125	7.10024	5.50212	5.01615	5.45285	6.06611	6.10188	5.75066
VTCN1	-1.21367	6.40417	-4.82752	8.47438e-05	0.00923058	1.49137	6.96878	6.93956	6.85547	5.84123	6.08133	5.20023	6.31399	6.48051	6.37736	6.80777	6.19769	6.0552
SLC7A1	1.21319	5.49452	6.5855	1.41984e-06	0.000377678	5.43425	4.27257	5.01908	4.99235	5.93579	5.95248	6.0353	5.82013	5.65022	6.01224	6.04882	5.66583	5.50136
IGFBP4	1.18189	6.23212	5.16723	3.75969e-05	0.00487906	2.27559	5.82335	5.43689	6.08707	7.10749	7.05091	6.73458	5.51949	5.6473	6.00503	6.20005	5.56846	6.31808
RAB26	-1.17005	4.49973	-5.49411	1.73436e-05	0.00298374	3.02252	4.96867	5.15203	5.20705	3.91434	3.97147	3.93179	4.09042	4.16428	3.99552	4.2845	4.88215	4.09728
C1orf64	-1.16348	4.49107	-7.00601	5.62693e-07	0.000173063	6.32225	5.40001	5.35702	5.33984	4.35396	4.40457	3.8479	3.88814	3.64595	3.84216	4.19909	4.08623	4.31212
DDIT4	-1.15206	7.28226	-8.50855	2.4964e-08	1.06824e-05	9.28336	7.55433	7.78381	7.68465	6.55084	6.60543	6.41033	7.99314	7.49909	7.97346	7.47215	7.2841	7.22973
MICB	1.13969	6.869	7.4538	2.15453e-07	7.57319e-05	7.23982	6.33878	6.4225	6.399	7.50439	7.67654	7.39841	6.60771	6.7094	6.71221	7.04673	6.77826	6.79871
RRS1	1.13803	6.0807	5.34887	2.4431e-05	0.00364318	2.69174	5.14427	5.55655	5.63915	6.33575	6.37202	7.04629	6.19813	5.53271	5.64908	5.93828	5.95958	6.12386
NEIL2	1.13456	3.33488	5.81132	8.26521e-06	0.00162692	3.73781	2.64123	2.99827	2.73717	3.91586	3.9211	3.94338	3.52161	2.40034	3.47359	3.30251	3.2153	3.28249
ITPK1	1.13049	4.62659	5.75188	9.48919e-06	0.00183123	3.60457	3.94245	4.07423	4.50131	5.30983	5.30232	5.29731	4.5317	4.15498	4.87716	4.47408	4.19518	4.34773
FLJ10847	1.13047	4.11958	5.25708	3.03667e-05	0.00426956	2.48177	2.57279	3.78903	3.65651	4.48448	4.31205	4.61322	4.66142	4.22699	4.44189	4.34472	4.54727	4.44189
PCP4	1.12653	4.39821	4.51721	0.000179001	0.0149026	0.770838	4.23416	4.03837	3.80175	5.2732	5.30957	4.87111	4.1694	4.27212	4.04171	3.95841	4.03066	4.46453
CBLN2	-1.12424	4.78002	-7.42732	2.27866e-07	7.7333e-05	7.18639	5.2741	5.85742	5.80614	4.46196	4.48561	4.61736	4.019	4.04551	3.98251	4.41776	4.597	4.61699
FKBP4	1.11773	7.97932	6.3688	2.30789e-06	0.000554006	4.96712	7.71797	7.42092	7.20007	8.62887	8.59183	8.47145	8.02581	8.1214	7.99627	8.39889	7.99099	7.89612
UNQ3045	1.11297	5.97847	4.65675	0.000127824	0.0117575	1.09515	5.46641	5.5255	5.1668	6.79688	6.7855	5.91524	6.30175	6.35343	6.61377	5.85081	5.82472	5.8591
LHFP	1.10651	5.43246	6.33105	2.51319e-06	0.000588924	4.88511	4.73833	4.99975	4.87147	5.93301	5.79186	6.20421	5.6946	5.65169	5.57344	5.462	5.47566	5.788
DDX21	1.08969	7.4855	4.77922	9.51767e-05	0.00989275	1.37941	6.30791	7.30466	7.08924	7.90846	7.63466	8.42776	7.5256	7.40825	7.7088	7.4223	7.36521	7.76105
AMD1	1.0799	5.57073	4.18717	0.000397561	0.0264461	0.00385802	4.69849	5.13622	5.04666	5.88697	5.79939	6.43473	5.83511	4.63114	5.43063	6.03572	6.23437	5.67316
SLC29A1	1.07452	4.46595	5.20357	3.44833e-05	0.00478006	2.35904	3.41113	4.12682	4.19486	5.0152	4.98863	4.95254	4.56096	4.00104	4.939	4.41684	4.33324	4.7606
ADCY9	1.06652	4.21098	4.24559	0.000345183	0.024618	0.13946	2.91825	3.98325	4.06218	4.73507	4.5004	4.92776	4.46726	3.45996	4.09549	4.66583	4.27593	3.90065
PGR	1.06542	4.62685	4.9281	6.65679e-05	0.00763867	1.72423	3.70109	4.83881	4.54046	5.38456	5.17226	5.7198	3.81393	3.87964	3.68653	4.66273	4.87383	4.50326
SLC9A3R1	1.03413	10.3912	5.8629	7.33401e-06	0.00147309	3.85311	10.0414	9.80724	9.83656	10.9665	10.9359	10.8852	10.3154	10.456	10.3433	10.9599	10.1744	10.2843
NDP	-1.03307	3.84526	-6.1765	3.56893e-06	0.000798305	4.54741	4.26793	4.78332	4.69866	3.58505	3.51988	3.54578	3.81163	3.05698	3.74257	3.72331	3.84724	3.82037
FLRT3	-1.03069	5.15871	-4.0348	0.00057458	0.0345753	-0.349175	5.35653	5.61215	5.48947	4.6985	4.10371	4.56388	5.11242	4.46178	5.13668	4.16618	5.39845	4.84175
C10orf33	-1.01716	4.36914	-6.01659	5.14559e-06	0.00110093	4.19484	5.00241	4.84104	4.89878	3.79924	3.94007	3.95143	3.78628	4.0278	3.82386	4.03115	4.23275	4.27537
MGC13096	0.993767	4.75615	3.98045	0.00065516	0.0366368	-0.474797	4.39959	4.4535	4.21242	5.52099	5.64084	4.88497	4.71811	5.19671	5.30889	4.64571	4.45672	5.03133
SLC7A5	0.992401	8.17198	4.72942	0.000107295	0.01056	1.26387	7.63495	7.56608	7.90718	8.62009	8.46245	9.00287	8.21829	7.61075	7.91464	8.43521	8.48016	8.31935
ADCY3	0.992176	5.45996	5.39304	2.20093e-05	0.00343834	2.79252	5.08028	4.90053	4.78302	5.87905	5.86628	5.99503	5.8133	5.73319	5.9482	5.6579	5.33792	5.44962
MYEOV	0.982755	4.20828	3.81523	0.000975614	0.0482512	-0.855266	2.6729	4.02864	3.95407	4.66912	4.49659	4.43816	4.77418	4.63114	4.79034	4.5315	4.26314	4.32131
LOC340204	0.980436	3.83367	4.11189	0.000476932	0.0297086	-0.170715	2.54823	3.58963	3.64828	4.41708	4.41384	3.89653	3.8664	3.59883	4.05151	3.41191	3.40155	3.87995
OKL38	0.979614	8.00785	5.65212	1.19742e-05	0.00222358	3.38011	7.8345	7.36063	7.6026	8.61221	8.76777	8.3566	7.69025	7.93876	7.66623	8.13638	8.02736	7.81108
SLC25A15	0.97503	4.50137	3.78517	0.00104876	0.0482531	-0.924227	3.37382	4.07089	4.15806	4.74905	4.67487	5.10394	4.33869	4.97119	4.59388	4.50701	4.87613	4.67566
EPAS1	-0.971522	6.56665	-4.52452	0.000175872	0.0147943	0.787816	6.51069	7.2224	7.3038	5.99426	5.73041	6.39764	6.79	6.39439	6.57558	6.37283	6.78372	6.28031
MCM10	0.953092	5.5293	3.906	0.000784033	0.0418715	-0.64651	4.71788	4.91361	4.9085	5.70707	5.74951	5.94267	5.838	5.84935	5.78616	5.97001	6.02212	6.02427
HERC5	0.946175	3.48608	5.08636	4.55892e-05	0.00577414	2.08954	2.40361	3.21865	2.92569	3.7405	3.86475	3.78122	3.87819	3.89781	3.94795	4.12196	3.82355	3.56693
C9orf89	0.944909	4.97502	4.14426	0.000441032	0.0278246	-0.0956824	4.49886	4.63273	4.76937	5.80255	5.83635	5.09679	4.98272	5.20239	5.08801	4.98584	4.68416	5.11593
CA12	0.944336	9.17335	4.01101	0.000608557	0.0356513	-0.40418	8.46019	8.4432	8.56498	9.57656	9.44784	9.27698	9.74082	9.64981	9.68766	9.92098	9.31385	9.0575
CLDN23	0.944182	3.88599	4.5816	0.000153229	0.0135662	0.92052	2.77343	3.81913	3.79018	4.253	4.36485	4.59744	3.73245	3.50263	3.73989	4.03665	3.8081	3.80119
GOLPH2	0.936697	5.12698	4.24904	0.000342311	0.024618	0.147482	3.80408	5.05168	4.93124	5.45426	5.45526	5.68757	5.38684	4.84263	5.21645	5.27476	4.97292	4.89103
LOC642019	0.934375	4.1949	5.18675	3.58899e-05	0.00480018	2.32044	3.48391	3.89378	3.79005	4.46732	4.58725	4.91629	4.3606	4.29736	4.29164	4.37513	4.5224	3.87516
EPS15L1	0.932283	3.43742	4.1829	0.00040169	0.0264461	-0.00605517	2.101	3.43779	3.28691	3.97085	3.82662	3.82507	3.48592	3.15547	3.53605	3.66251	3.57259	3.33418
DKFZp761P0423	0.928838	7.41982	4.01984	0.000595718	0.0355003	-0.383766	6.76226	7.05365	7.03984	7.80035	7.54708	8.29484	7.53409	6.75241	7.0972	7.74723	7.67562	7.25219
DKFZp686O24166	0.926519	4.15265	4.46847	0.000201371	0.016245	0.657503	3.51165	3.68111	3.74373	4.35945	4.49759	4.859	4.37112	4.74618	4.10151	4.57113	3.92373	4.33736
C9orf111	-0.924485	7.03432	-3.85185	0.000893295	0.0455534	-0.771132	7.71281	7.12195	7.62148	6.67741	6.58928	6.41611	6.7313	7.10515	6.79382	7.18379	7.06583	6.64497
NRIP1	0.922389	5.38754	5.48351	1.77818e-05	0.00298374	2.99843	4.7154	5.28572	5.03697	5.85554	5.88834	6.06138	5.48555	5.44052	5.41907	5.42394	5.63489	5.30244
EPB41L3	0.920142	4.69813	5.4021	2.15431e-05	0.0034198	2.81319	3.79309	4.28635	4.18832	4.93993	4.96175	5.1265	4.89784	4.43237	5.10933	4.66798	4.52129	4.68675
LRRN3	0.915802	4.37085	5.48101	1.78867e-05	0.00298374	2.99275	3.43641	4.04318	3.92313	4.6537	4.54622	4.95022	4.52498	4.7341	4.29246	4.44324	4.6949	4.35172
SERPINI1	0.91548	3.44666	5.63943	1.23347e-05	0.00224811	3.35148	2.56352	3.29178	3.26405	3.85755	4.08179	3.92644	3.22549	3.20176	3.21019	3.16295	3.46227	3.55103
KIAA0690	0.914222	5.69586	6.74007	1.0077e-06	0.000283365	5.76355	4.98625	5.3823	5.40605	6.20662	6.13718	6.17346	5.53484	5.55296	5.68895	5.7446	5.45832	5.60844
PPRC1	0.913351	6.36535	4.92698	6.67472e-05	0.00763867	1.72164	5.78946	5.77735	6.12632	6.73539	6.64435	7.05343	6.3915	6.01432	6.09257	6.47126	6.27606	6.14085
SIPA1L2	0.9088	4.97838	3.80477	0.00100047	0.0482531	-0.879271	3.72844	4.89575	4.80465	5.31596	5.29931	5.53997	4.7305	4.23114	4.91169	5.42905	4.90835	4.92683
CDC25A	0.901488	3.71762	4.40577	0.000234324	0.0181592	0.51171	2.86164	3.15641	3.3605	3.81456	4.109	4.15945	3.9592	4.4505	4.02871	3.94187	3.33127	4.01921
BOP1	0.895838	7.23026	4.67793	0.000121464	0.0114116	1.14433	6.84924	6.59593	6.90277	7.77955	7.61036	7.64555	7.60383	7.11912	7.36744	7.53131	7.07949	7.21194
FAM57A	0.895555	4.61454	7.72721	1.21482e-07	4.59858e-05	7.7855	3.94634	4.24625	4.13218	4.98612	5.01467	5.01065	5.09543	5.1174	5.01446	4.78336	5.02701	4.72785
NOLC1	0.892773	5.02347	4.84755	8.07614e-05	0.00903242	1.53779	4.42841	4.70595	4.55745	5.52701	5.34836	5.49475	5.19136	5.21106	4.917	4.82028	4.91058	5.20855
BAMBI	-0.891328	8.8921	-7.04833	5.13306e-07	0.000168399	6.41021	9.29813	9.68625	9.55168	8.61104	8.56953	8.68151	8.55928	8.46176	8.53405	8.80228	8.98172	8.68133
RBPMS2	0.883054	6.11947	3.79255	0.00103031	0.0482531	-0.907303	5.01784	5.71328	5.81466	6.47859	6.41568	6.30068	6.81544	6.38834	6.6857	6.58238	6.24129	6.09137
FAM43A	-0.8751	4.34267	-4.7561	0.000100621	0.0102094	1.32579	5.22536	4.70103	4.58174	3.96677	3.92311	3.99296	3.98504	4.36733	3.7014	4.25923	4.38555	4.25999
GRB10	0.870668	4.93298	4.41922	0.000226827	0.0177177	0.542982	3.89959	4.59215	4.70593	5.30823	5.12458	5.37687	5.30316	5.25172	5.33488	5.40823	5.3418	4.74256
HIG2	-0.87063	7.83204	-4.98111	5.86305e-05	0.00712396	1.84674	8.09243	8.15548	8.17754	7.29697	7.30479	7.21179	7.99788	8.33131	8.20719	8.34629	8.13572	7.53599
TGIF2	0.869696	4.21264	3.91334	0.000770285	0.041427	-0.629602	3.31195	3.87919	4.12636	4.67437	4.38175	4.87049	4.04034	3.42328	3.92103	4.45294	4.38103	4.04098
EXO1	0.849176	5.83809	4.82456	8.53468e-05	0.00923058	1.48453	4.79215	5.57776	5.3704	6.06467	6.09334	6.12982	6.43613	6.28843	6.38391	6.21475	6.1541	6.13766
SEC14L2	0.847674	4.09229	4.53619	0.000170981	0.0145069	0.814966	3.17955	3.39319	3.23341	4.12083	3.958	4.27035	4.23496	3.44335	4.00006	4.66698	4.04184	4.17597
IFRD2	0.846492	4.91738	5.26086	3.00956e-05	0.00426956	2.49042	4.18298	4.72366	4.60997	5.43896	5.31464	5.30249	5.23077	4.47619	5.02421	5.06315	4.93108	4.88081
TSC22D3	-0.839693	5.33153	-4.97551	5.94216e-05	0.00713204	1.83381	5.35423	5.71364	5.49504	4.68438	4.68824	4.67122	6.23667	5.92129	5.99901	5.41725	5.67217	5.36629
TPD52L1	0.838283	7.8568	4.93297	6.57952e-05	0.00763867	1.7355	7.50553	7.60569	7.41693	8.44081	8.50183	8.10035	7.81179	8.40868	8.0274	7.76424	7.76257	7.92885
EVI1	-0.835085	3.62891	-5.18801	3.57827e-05	0.00480018	2.32333	4.41144	4.16659	4.03373	3.10814	3.40357	3.59481	3.16115	3.28301	3.16149	3.52065	3.64393	3.51358
ARL4D	-0.831644	3.7965	-6.75515	9.74704e-07	0.000282148	5.7955	4.21286	4.49273	4.31664	3.4337	3.63325	3.46035	3.69391	3.60956	3.75235	3.58005	3.78381	3.67582
SLITL2	-0.82135	5.76359	-4.69593	0.000116307	0.0111135	1.18614	5.78503	6.1045	6.28747	5.08348	5.33302	5.29645	5.97981	5.92094	5.63813	5.77521	5.80974	5.43407
C3orf26	0.821217	4.74046	4.56152	0.000160838	0.0138857	0.873848	4.27821	4.52793	4.17774	5.3007	5.22743	4.9194	4.95033	5.35919	4.95726	4.46084	4.50118	5.11734
CEBPD	-0.821069	6.98239	-4.86876	7.67519e-05	0.00868267	1.58691	7.1934	7.36695	7.11007	6.63101	6.39809	6.17811	7.88182	7.66968	7.79642	7.50989	6.97016	6.76639
ANGPTL4	-0.820065	5.16509	-6.06404	4.61473e-06	0.00100929	4.29979	5.61853	5.55725	5.60906	4.85763	4.76942	4.69759	5.59907	5.33126	5.33625	5.06613	5.08379	4.72093
BYSL	0.815442	5.59802	4.51101	0.000181702	0.0149026	0.756422	5.16812	5.35497	5.24268	6.10278	6.14843	5.96088	5.40768	5.72527	5.61176	5.43783	5.58004	5.59945
RERG	0.813122	4.73288	3.80949	0.000989181	0.0482531	-0.868443	4.28819	4.68339	4.36185	5.25397	4.93435	5.58448	4.56539	4.21528	4.21374	4.23578	5.12189	4.64774
LYAR	0.812214	5.28895	4.76286	9.89975e-05	0.0101493	1.34147	4.57973	5.09281	5.01821	5.7319	5.71675	5.67873	5.26785	5.43445	5.1076	5.21014	5.47162	5.52676
PUS1	0.809222	6.43941	3.98193	0.000652824	0.0366368	-0.471379	5.78887	5.90479	6.14249	6.74702	6.57079	6.946	6.665	5.90699	6.34017	6.86388	6.46856	6.42292
OSBPL10	0.8021	4.61447	3.96555	0.000679135	0.037763	-0.509181	3.47293	4.50423	4.4694	4.99068	4.82513	5.03705	5.09166	4.78937	4.94361	4.57647	4.71623	4.78179
TRIP13	0.800739	7.61797	4.57003	0.000157568	0.0137237	0.89363	6.69028	7.26432	7.26323	7.79567	7.73443	8.08994	8.18911	7.90973	8.03717	7.68819	8.219	7.84104
P8	-0.80022	10.4382	-4.15007	0.000434873	0.0277923	-0.0821947	10.65	10.634	10.8769	10.0736	10.1788	9.50796	11.2894	11.0297	11.4385	10.3314	10.3231	10.3711
PEO1	0.799487	4.6412	5.92202	6.3974e-06	0.00133964	3.98489	4.37746	4.31671	4.19794	5.14599	5.2622	4.88239	4.56299	4.85438	4.71057	4.46614	4.68648	4.53974
SGK3	0.792715	3.96464	5.72198	1.01733e-05	0.0019255	3.5374	3.48416	3.55101	3.5094	4.34125	4.25947	4.322	3.93494	3.54475	3.84329	4.14583	4.25496	4.10103
NOL5A	0.787075	7.44025	4.22399	0.000363693	0.0252075	0.0893099	6.61641	7.23201	7.1686	7.74648	7.56877	8.063	7.27476	7.23043	7.21218	7.70054	7.53782	7.66378
CEP135	0.784298	4.79258	4.44711	0.00021204	0.0168169	0.607829	4.29494	4.4493	4.34945	5.11804	4.87163	5.4569	4.75146	4.74162	4.55875	4.96796	5.2871	4.67493
ABCG1	-0.783605	4.35399	-4.24754	0.00034356	0.024618	0.143983	4.45217	5.00114	5.19483	4.18738	3.68883	4.42113	3.8766	3.53089	3.75675	4.13169	4.33939	4.44263
HES1	-0.781491	4.42389	-4.38781	0.00024472	0.0188167	0.469965	4.36077	5.02863	4.88595	3.90024	3.9178	4.11283	4.2369	4.34358	4.26235	4.41566	4.3076	4.06683
NOL1	0.780152	5.5752	3.84409	0.00091014	0.0458366	-0.788967	4.66586	5.29716	5.45104	6.06841	5.72136	5.96476	5.51627	5.09394	5.34535	5.6605	5.36007	5.45893
UCK2	0.774141	6.31299	5.45566	1.89866e-05	0.00311444	2.93514	5.71578	5.94429	6.00242	6.73797	6.77469	6.47225	6.52109	6.66829	6.66065	6.46452	6.0941	6.63064
ELF3	-0.773882	5.03537	-4.77786	9.54898e-05	0.00989275	1.37625	5.42426	5.35897	5.50757	4.92752	4.47795	4.5637	4.89022	5.36501	5.1055	4.65473	5.22959	5.13828
LOC88523	-0.772638	4.60316	-4.26471	0.00032958	0.0243889	0.183875	4.78461	5.18111	4.99813	4.27704	3.99251	4.37638	4.44369	4.10096	4.35187	4.483	4.70499	4.20593
CARD10	0.76726	4.31409	4.58575	0.000151702	0.0135662	0.930168	3.57592	3.90264	4.19557	4.72323	4.66385	4.58884	4.35108	4.59187	4.53638	4.73168	4.68302	4.189
TM4SF1	-0.766163	4.16935	-5.53474	1.57642e-05	0.00277056	3.11469	4.60382	4.58675	4.47906	3.73082	3.81244	3.82788	4.29101	4.43797	4.28114	4.06629	4.18095	4.18981
CHSY1	0.765041	5.28312	4.66269	0.000126008	0.0116997	1.10893	4.88033	4.93204	4.92818	5.57239	5.60155	5.86174	5.07033	5.11731	5.23111	5.68689	5.23663	5.22374
LRP8	0.759592	3.9752	3.78888	0.00103944	0.0482531	-0.915713	3.11902	3.65981	3.74305	3.9507	4.13375	4.71622	4.17259	4.05705	4.17318	4.01101	4.38644	4.00297
JMJD2B	0.750822	4.90542	4.22445	0.000363287	0.0252075	0.0903811	4.19764	4.47811	4.46871	5.12171	5.18431	5.0909	4.88856	4.6781	5.14468	4.9433	4.46755	4.76424
LYSMD2	0.748093	5.40004	3.76992	0.00108789	0.0491312	-0.959155	4.68631	5.29036	5.06985	5.78211	5.78318	5.72551	5.25138	5.05975	5.22816	5.79891	5.52357	5.3596
OLFML3	0.740423	7.65657	4.71726	0.000110483	0.0107661	1.23565	7.19601	7.41864	7.25654	8.0844	7.92307	8.085	7.9147	7.47736	7.96786	7.29954	7.55732	7.74295
LYPD3	-0.739015	5.6615	-4.22871	0.000359564	0.0252075	0.100272	6.31443	6.09758	6.04656	5.51542	5.73041	4.9957	5.48223	5.98599	5.82292	5.6573	5.72212	5.75633
MCM2	0.738454	6.3426	3.9886	0.000642396	0.0365731	-0.45597	5.71531	5.93475	5.98958	6.60968	6.51273	6.73259	6.95361	6.48247	6.80974	6.31093	6.24388	6.45012
FAM113B	-0.738081	3.66867	-5.41557	2.08691e-05	0.00336711	2.84388	4.3022	4.1495	4.19243	3.67271	3.52194	3.23524	3.31559	3.64349	3.28113	3.49065	3.48069	3.52875
SEMA3C	0.735715	4.5919	4.17874	0.000405747	0.0264461	-0.0156969	4.39011	4.36876	4.26445	4.76798	4.88596	5.57651	4.04679	3.9608	3.88775	5.06944	4.8998	4.50937
POLE2	0.73436	6.1134	4.62968	0.000136446	0.0123202	1.03226	5.19771	5.88317	5.6703	6.30501	6.21733	6.43193	6.65671	6.56435	6.59549	6.1271	6.4686	6.43124
AP1S2	0.733517	4.58282	3.7986	0.00101542	0.0482531	-0.893419	3.63269	4.6628	4.35754	4.95102	4.83487	5.0677	4.47923	3.9968	4.0899	4.7556	4.74338	4.4371
TRA16	0.732893	5.18363	3.90372	0.000788359	0.0418715	-0.651768	4.46917	4.87513	4.89853	5.50538	5.54621	5.38993	5.46523	4.96924	5.17862	5.01531	5.06075	5.41842
DKC1	0.7308	6.94466	5.60891	1.32476e-05	0.0023706	3.28257	6.43751	6.54806	6.66701	7.3314	7.16065	7.35294	7.00517	6.90864	7.25838	6.69819	6.82657	7.0039
DEGS1	0.729989	6.93226	5.31761	2.63072e-05	0.00386441	2.62031	6.17388	6.71589	6.27188	7.13182	6.96189	7.25791	7.47764	7.32696	7.44993	7.15392	7.27579	7.11352
CITED2	-0.727217	6.74234	-3.77715	0.00106915	0.0489424	-0.942593	6.77674	7.44871	7.44159	6.50626	6.41245	6.56669	6.49943	6.28466	6.66304	6.73517	6.84334	6.39326
JTV1	0.727013	9.29875	4.73538	0.000105766	0.0105147	1.27771	8.73316	8.92412	8.96108	9.65345	9.5836	9.56234	9.63936	9.11736	9.47421	9.73278	9.18554	9.29674
INPP4B	0.725377	5.36692	5.29095	2.80229e-05	0.0040559	2.55931	5.17195	5.20012	5.23334	5.9356	6.06201	5.78393	4.784	4.8615	5.23484	5.17822	5.3484	5.29052
PDXP	0.724373	5.9402	4.04352	0.000562609	0.0343383	-0.329013	5.68523	5.52976	5.38624	6.39352	6.32121	6.05962	6.49821	6.09171	6.12558	6.29338	6.26675	5.86328
SOX13	-0.721998	6.8557	-4.7957	9.14789e-05	0.00968102	1.41762	7.12541	7.22884	7.36189	6.60089	6.41977	6.52949	6.90472	6.90394	6.87385	6.96698	7.08036	6.58115
RCL1	0.719849	4.4426	4.18089	0.000403648	0.0264461	-0.0107212	3.45721	4.22481	4.12589	4.54575	4.67782	4.74388	4.91882	4.78908	4.70937	4.60328	4.59016	4.52705
METTL1	0.71976	4.82683	4.5785	0.000154381	0.0135662	0.913309	4.81023	4.40386	4.24448	5.17488	5.35868	5.0843	4.85416	5.08992	4.98051	4.71803	4.73753	4.80489
FLJ41603	-0.711687	6.36142	-3.9325	0.000735505	0.0402158	-0.585436	6.02595	6.46462	6.49093	5.70609	5.51516	5.62517	6.84111	6.92364	6.93115	6.79904	6.29512	6.37337
LHX4	0.710092	3.30008	3.98161	0.000653315	0.0366368	-0.472098	2.2189	3.15164	3.15617	3.58984	3.52991	3.53723	3.55759	3.62456	3.50535	3.39659	3.41946	3.62851
ASB13	0.709785	4.48149	3.95648	0.00069416	0.0383816	-0.530112	4.21614	3.94092	4.04783	4.81277	4.68875	4.83274	4.65778	4.39542	4.29431	4.83061	4.61053	4.29264
C1orf33	0.709396	5.06901	3.89773	0.000799821	0.0418715	-0.665561	4.39053	4.86758	4.74029	5.43929	5.62409	5.06322	5.15746	5.58162	5.28917	5.17085	4.88226	5.03266
LRRFIP2	0.701545	4.25093	4.17894	0.000405552	0.0264461	-0.0152369	3.58008	3.86674	3.69566	4.4183	4.43085	4.39797	4.98732	4.49814	4.46062	4.52375	4.37257	4.42871
SLITRK4	0.700278	4.33372	3.76016	0.00111371	0.0498227	-0.981513	3.59101	4.17441	4.10522	4.48042	4.4784	5.01265	4.25571	4.25713	4.0158	4.55729	4.54227	4.40085
RASSF1	0.69753	5.51435	5.16634	3.76761e-05	0.00487906	2.27356	4.81011	5.21915	5.07835	5.68036	5.60976	5.91009	6.12474	5.69741	5.87061	5.49897	5.59696	5.71354
PDCD11	0.695666	5.47755	4.48209	0.000194852	0.015849	0.689174	5.05478	5.1558	5.19912	5.91168	5.73623	5.8488	5.48257	5.4792	5.48595	5.81291	5.78858	5.23312
TIPARP	0.694758	6.32877	3.75928	0.00111608	0.0498227	-0.983537	5.36751	5.80696	5.65167	6.35925	6.09108	6.46009	6.95859	6.73106	6.87262	6.66759	6.71072	6.67639
PPFIBP2	-0.681682	4.66322	-4.15579	0.0004289	0.0275897	-0.0689301	4.7275	5.11493	5.08293	4.20968	4.23722	4.43342	4.77839	4.88454	4.89697	4.60869	4.81487	4.37798
BRI3BP	0.679643	5.97993	4.81484	8.73655e-05	0.00934621	1.46199	5.57559	5.47432	5.52591	6.13562	6.15174	6.32739	6.25409	6.24835	6.25043	6.19901	6.19575	6.15406
MGC24039	0.678158	2.98974	4.14499	0.000440246	0.0278246	-0.0939725	2.2014	2.77091	2.46154	3.1239	2.97897	3.36545	3.23016	3.03898	3.03011	3.12364	3.1636	2.98541
CIRH1A	0.672522	7.05899	3.75453	0.00112888	0.0498227	-0.99441	6.32964	6.91372	6.84679	7.4914	7.32106	7.29526	7.16989	6.86251	7.33299	6.96791	7.21829	6.97486
CASC1	-0.672357	4.29611	-4.29658	0.000305132	0.0229245	0.257909	4.42992	4.88708	4.65394	4.12969	3.77048	4.05371	3.93655	3.94678	4.13372	4.03042	4.58364	4.18562
DDX10	0.666944	6.02628	4.33699	0.00027672	0.0211122	0.351825	5.69913	5.80633	5.64196	6.30337	6.40368	6.44121	6.0255	5.88393	6.26646	6.06127	5.76642	6.0246
CDCA5	0.665266	8.71437	3.75548	0.0011263	0.0498227	-0.992224	7.94844	8.19907	8.41093	8.83354	8.65855	9.06214	9.45393	8.85714	9.09233	8.95562	9.38482	8.91065
MTAP	0.660199	4.00413	4.30186	0.000301261	0.0228078	0.270175	3.39367	3.78851	3.83247	4.25143	4.20833	4.53548	3.82399	3.8146	3.99016	4.18589	4.09586	3.93273
TRIM8	0.658101	7.87298	4.70544	0.000113673	0.0109684	1.20821	7.42056	7.55449	7.67927	8.19943	8.07152	8.35768	7.87337	7.64631	7.83158	7.91026	7.98878	7.81568
PTGER3	0.655612	6.76603	3.78581	0.00104713	0.0482531	-0.922743	6.29938	6.90365	6.67142	7.17357	7.11949	7.54822	6.49277	6.20142	6.04849	6.97288	6.88387	6.49903
WIPI1	0.655121	6.16155	4.83943	8.23517e-05	0.00910681	1.51899	5.63097	5.97474	5.92274	6.48873	6.51987	6.4852	6.24325	6.02922	5.97079	6.10147	6.07841	6.15836
TYRP1	0.65473	6.41934	3.76978	0.00108825	0.0491312	-0.959473	5.67274	6.4268	6.21621	6.75109	6.6961	6.83274	6.46221	6.25191	6.29969	6.16228	6.61916	6.61001
C6orf165	-0.654285	4.24759	-4.98392	5.82365e-05	0.00712396	1.85325	4.48857	4.81873	4.75699	3.87374	4.0227	4.205	3.80937	3.95575	3.69588	4.01719	4.22408	4.03317
SNX24	0.649085	3.40547	4.25853	0.000334545	0.0245716	0.169516	2.60224	3.27428	3.31703	3.58753	3.62272	3.93056	3.54068	3.29955	3.49034	3.3584	3.34368	3.61474
LOC647000	0.64858	8.46249	3.75065	0.00113945	0.0498423	-1.00329	7.87491	8.19682	8.14477	8.66023	8.59015	8.91187	8.95695	8.51893	8.69616	8.44591	8.38235	8.67819
PLEK2	0.648169	4.31139	3.87469	0.00084548	0.0435666	-0.718597	4.00782	4.22702	3.96663	4.66515	4.82493	4.6559	4.29356	4.52691	4.63035	4.31239	4.17432	4.52883
PFKP	0.648132	7.81907	3.99807	0.000627874	0.0361376	-0.434089	7.21719	7.57649	7.54084	8.22167	8.09202	7.96523	8.16903	8.18113	8.2323	7.93233	8.2494	8.00041
KYNU	-0.647013	8.04989	-4.0535	0.0005492	0.0337827	-0.305909	8.1417	8.68625	8.47177	7.67357	7.72561	7.9595	7.68884	7.80983	7.65865	7.75584	8.28573	7.92417
EXOSC2	0.644579	5.70006	3.81615	0.000973438	0.0482512	-0.853136	4.98481	5.38833	5.5343	5.87589	5.93416	6.03112	5.75138	5.22632	5.74882	5.79178	5.62874	5.91576
PCMTD1	-0.640664	5.21251	-4.08664	0.000506933	0.0313788	-0.229185	5.63852	5.47652	5.50416	4.8335	4.76034	5.10338	4.8028	5.09559	4.98145	5.0316	5.51865	5.12976
PBK	0.640179	6.10049	3.75727	0.00112146	0.0498227	-0.988124	5.31242	6.07295	5.57082	6.24628	6.16167	6.46877	6.60639	6.51068	6.47158	6.18498	6.38811	6.43772
CHPT1	0.638739	8.08934	4.14069	0.000444851	0.0278868	-0.103952	7.19832	7.70934	7.4924	8.13194	8.18001	8.00433	8.52902	8.49963	8.45423	8.47661	8.09616	8.3698
CDR2L	-0.633836	4.18413	-4.04161	0.000565212	0.0343383	-0.333432	4.49787	4.47797	4.85344	4.08218	3.92437	3.92121	3.8352	3.54236	3.94818	4.17399	4.22188	4.11434
FAM44B	0.632431	7.19765	4.54948	0.000165583	0.014171	0.845855	6.75274	7.15855	6.70791	7.52115	7.43173	7.56361	7.14746	6.88561	7.07854	7.28541	7.16463	7.19863
RAB31	0.630085	5.78627	4.63709	0.000134031	0.0122142	1.04947	5.13463	5.62936	5.47589	5.96621	6.16423	5.99968	5.4727	5.74684	5.6447	6.09767	5.96546	5.84451
LIMK1	0.625275	5.3894	3.78857	0.00104022	0.0482531	-0.916428	4.78155	5.04897	5.24124	5.52971	5.41803	5.99984	5.31269	5.17514	5.15401	5.38024	5.52218	5.45152
OGFOD1	0.622376	5.69856	3.79817	0.00101647	0.0482531	-0.894405	5.20435	5.55121	5.43392	6.13674	5.82789	6.09199	5.71031	5.31643	5.54459	6.05189	5.61061	5.87213
MKI67IP	0.614964	6.43843	4.01338	0.000605091	0.0356513	-0.398712	5.88316	6.21077	6.26597	6.62237	6.5583	7.02413	6.36119	6.30956	6.02619	6.37315	6.32391	6.63152
FLJ13912	0.614877	5.24143	4.21312	0.000373379	0.0256979	0.0640805	4.52838	5.01762	4.85629	5.52562	5.2815	5.43981	5.54671	5.60701	5.62711	5.3031	5.38797	5.55385
CCL2	-0.614718	3.38931	-3.94654	0.00071101	0.0390936	-0.553049	4.18133	3.7515	3.99596	3.28484	3.54909	3.25071	3.01273	2.66221	3.02	3.04044	3.24863	3.41298
CAPN5	-0.614625	3.63423	-3.79072	0.00103485	0.0482531	-0.911491	4.14743	4.03664	3.88646	3.57809	3.31816	3.3304	3.43736	3.72077	3.49365	3.60777	3.65827	3.43699
RBKS	-0.607493	4.49361	-4.46366	0.000203724	0.0163013	0.646324	4.9566	4.81671	4.70511	4.22698	4.32043	4.10853	4.40472	4.41988	4.70624	4.34686	4.38542	4.47087
SALL2	-0.606686	3.50152	-4.4441	0.000213586	0.0168169	0.600843	3.96658	3.94219	3.85545	3.36351	3.41315	3.16749	2.97368	3.12596	3.12734	3.38332	3.49161	3.3166
LOC650803	0.605892	3.82537	3.84182	0.000915126	0.0458366	-0.794182	3.48329	3.69324	3.64668	4.19553	4.41651	4.02883	3.86087	3.78243	3.88795	3.91559	3.81897	3.49861
LARGE	0.604646	4.05443	3.80699	0.000995142	0.0482531	-0.874175	3.75181	3.8807	3.67929	4.5727	4.00404	4.54899	4.09941	3.78896	4.03948	4.1944	4.32016	4.11476
TUBB6	0.60391	6.36831	4.00265	0.000620962	0.03595	-0.423494	6.04961	6.04497	6.16119	6.80366	6.75919	6.50465	6.56861	6.43491	6.74004	6.53816	6.19838	6.40319
PRAF1	0.602884	4.75886	3.89875	0.000797849	0.0418715	-0.663202	4.20693	4.74544	4.37938	5.15684	5.07682	4.90674	5.05116	5.22315	5.06495	4.53447	4.95552	4.88351
GPR37L1	0.59638	3.531	3.92398	0.000750771	0.0408072	-0.605075	2.98473	3.32272	3.42282	3.78941	3.90896	3.82103	3.75499	3.36816	3.58958	3.70987	3.43973	3.6583
ACA10	0.595159	4.32503	4.67697	0.000121745	0.0114116	1.1421	3.86417	4.0631	4.15854	4.57695	4.7772	4.51713	4.37084	4.15904	4.36477	4.37457	4.13447	4.26848
LTV1	0.594263	6.29494	3.77153	0.00108371	0.0491312	-0.955483	5.66994	6.09006	6.21215	6.54328	6.35992	6.85174	6.08843	6.15907	6.23413	5.98599	6.22728	6.49912
DTL	0.587595	7.47603	4.00732	0.000614011	0.035758	-0.41272	7.05542	7.15401	6.98702	7.6812	7.50552	7.77251	7.6514	7.71106	7.85096	7.79778	7.79668	7.75965
C17orf53	0.586557	5.99773	4.18514	0.000399515	0.0264461	-0.000845307	5.53377	5.59617	5.63555	6.15043	6.3176	6.05714	6.51231	6.41078	6.28502	6.10752	6.44344	6.0339
UNG2	-0.583421	8.49197	-3.84657	0.000904728	0.0458366	-0.783274	8.56489	8.98204	9.07178	8.24335	8.19652	8.42857	7.97956	7.99425	7.97793	8.53653	8.99517	8.47703
FZD4	-0.583257	6.18232	-4.23538	0.000353807	0.0250516	0.115766	6.39438	6.53487	6.48113	5.81431	5.72522	6.12107	5.82557	5.80396	5.8534	6.03764	6.00558	5.8613
UBIAD1	0.572467	5.3958	3.84076	0.000917477	0.0458366	-0.796631	5.34911	5.03481	4.94136	5.71591	5.89815	5.42862	5.55217	5.55098	5.55265	5.56792	5.31824	5.50764
HCAP-G	0.570518	6.70542	3.92187	0.000754613	0.0408072	-0.609955	6.33836	6.39747	6.26712	6.82304	6.81288	7.0786	6.92463	7.06164	7.11757	6.8271	7.26759	6.92519
OACT5	-0.56206	4.71181	-4.16018	0.00042437	0.027478	-0.0587472	5.01462	4.99105	4.93424	4.41508	4.56969	4.26896	5.0097	4.99805	5.17677	4.99754	4.61958	4.63139
CDCA4	0.556247	6.11971	3.98829	0.000642873	0.0365731	-0.456681	5.59879	5.70511	5.77229	6.29616	6.26695	6.18182	6.60244	6.31	6.4651	6.52047	6.39652	6.21347
RUVBL1	0.552562	5.37849	4.19366	0.000391368	0.0264461	0.0189224	4.93905	5.18863	5.12603	5.75402	5.62315	5.53422	5.64359	5.45172	5.37456	5.48855	5.32427	5.51016
CARD15	0.550596	3.25963	3.78499	0.00104919	0.0482531	-0.924622	2.90599	3.0732	3.0415	3.45691	3.35484	3.86072	3.2202	2.95881	3.31558	3.14168	3.31666	3.20849
C1orf135	0.546144	4.46458	4.25134	0.00034041	0.024618	0.152827	4.23423	4.21623	4.01811	4.73918	4.65139	4.71644	4.43395	4.64778	4.62441	4.75089	4.90695	4.63581
PDHB	0.536097	9.23179	3.80698	0.000995151	0.0482531	-0.874183	8.81051	9.10201	9.02489	9.43201	9.4777	9.63599	8.91174	8.98199	9.00907	9.38045	9.49211	9.14487
LOC401052	-0.534536	4.13826	-3.88981	0.000815238	0.0422293	-0.683803	4.56116	4.61762	4.40356	4.24083	3.90207	3.83584	3.90059	3.58969	3.78129	4.02799	3.95478	4.09039
BMP4	-0.529383	5.06327	-4.26652	0.000328139	0.0243889	0.188083	5.32704	5.51554	5.40063	4.98735	4.84822	4.8195	4.92773	4.97196	5.16038	5.15755	5.19832	4.91405
CENTA2	0.523249	4.15417	3.89417	0.000806716	0.042009	-0.673762	4.05039	4.10086	3.83389	4.44255	4.74457	4.36778	3.96724	3.8677	3.88249	4.20814	3.91766	4.0362
FUBP1	0.500159	3.81429	3.78901	0.00103911	0.0482531	-0.915411	3.2338	3.68737	3.59339	3.9918	4.05756	3.96568	3.85345	3.95058	4.0899	3.70943	3.77434	3.77155
RND1	-0.495737	3.4495	-4.01773	0.000598766	0.0355003	-0.388652	3.96111	3.68346	3.56857	3.19768	3.2885	3.23974	3.24304	3.21809	3.44232	3.35344	3.16945	3.32489
KLF9	-0.477358	4.57853	-3.74832	0.00114584	0.0498998	-1.00862	4.41296	4.83851	4.6854	4.12738	4.09716	4.28025	5.18144	5.30934	5.27332	4.72689	4.86094	4.58366
Pfs2	0.475406	10.3068	3.90067	0.000794177	0.0418715	-0.658794	9.69919	10.0053	9.95717	10.3992	10.3474	10.3413	10.9619	10.955	10.8898	10.7615	10.4565	10.4447
POP1	0.463658	4.10445	4.19447	0.00039061	0.0264461	0.0207824	3.94383	3.88125	3.93275	4.31966	4.48781	4.34134	4.03632	3.9927	3.82731	3.99726	3.89502	3.9381
FLT4	0.445535	3.43706	3.75099	0.00113851	0.0498423	-1.00251	3.1899	3.16962	3.31106	3.74248	3.62166	3.64306	3.43423	3.12143	3.31226	3.32567	3.2682	3.4952
C. GENES SIGNIFICANTLY REGULATED BY E2+P4 IN COMPARISON TO VC (adj. P < 0.01) IN T-47D CELLS
ID	logFC	AveExpr	t	P.Value	adj.P.Val	B	VCx1	VCx2	VCx3	E2x1	E2x2	E2x3	P4x1	P4x2	P4x3	E2+P4x1	E2+P4x2	E2+P4x3
CLIC6	2.05692	6.93154	10.7241	4.29e-10	4.22e-06	12.3723	4.9734	5.64774	5.6892	7.58736	7.38938	7.73908	7.56605	7.55324	7.72065	7.38201	7.8366	7.26248
GJA1	1.51896	4.70129	6.57714	1.45e-06	0.0011864	5.32214	3.00377	4.08735	3.80469	4.98612	4.99957	5.44458	5.05045	5.11726	5.2089	4.74133	5.43515	5.27622
MYC	1.48345	5.39694	6.07065	4.55e-06	0.0029824	4.27793	3.84335	4.43418	4.54868	6.10577	5.99766	6.57611	6.03391	5.31676	5.46015	5.72306	5.99696	5.55652
SGK	1.47648	5.18037	7.48724	2.01e-07	0.000246987	7.10052	4.54191	4.18469	4.02976	4.66349	4.67051	5.2295	6.7533	6.36249	6.41059	5.4903	5.86831	5.82717
CXCL12	1.46286	4.79272	8.11116	5.53e-08	0.000108775	8.24337	3.07275	3.22541	3.47314	6.58135	6.37701	6.86649	4.74093	4.72046	4.52279	4.64645	4.96868	4.54475
OLFM1	1.46185	7.09817	7.81308	1.02e-07	0.000166798	7.70519	5.72944	5.96676	6.21112	8.16664	8.07028	8.63666	7.29771	6.62287	7.10112	7.5419	7.52051	7.23044
MAFB	1.32619	6.42269	8.59956	2.09e-08	5.19e-05	9.09442	5.83526	6.13121	5.94396	5.7444	5.69261	5.86581	8.44613	8.11063	8.16236	7.37497	7.34507	7.16896
RAPGEFL1	1.31826	5.48604	7.42592	2.29e-07	0.000249927	6.98481	3.88501	4.73758	4.87837	6.21608	6.10078	6.25836	5.59569	5.81299	5.8604	5.86678	5.94398	5.64497
CMTM7	1.28054	7.15335	9.43125	4.27e-09	2.1e-05	10.4576	6.20351	6.09774	6.11898	7.87869	7.69822	7.49473	7.64253	7.42301	7.64459	7.56875	7.27285	7.42025
CD44	1.26526	5.54009	5.8686	7.24e-06	0.00419038	3.85139	4.16	5.1141	4.74654	5.99725	5.90747	6.26365	6.12888	5.91422	6.25298	6.02894	6.066	5.72149
STC2	1.22292	8.08915	5.22794	3.25e-05	0.00959492	2.46628	6.46612	7.04134	7.13847	8.77763	8.64865	9.54077	7.71971	7.28502	7.87544	8.09941	8.16292	8.05237
C1orf64	-1.16648	4.49107	-7.02405	5.41e-07	0.000484114	6.21167	5.40001	5.35702	5.33984	4.35396	4.40457	3.8479	3.88814	3.64595	3.84216	4.19909	4.08623	4.31212
MCM10	1.1588	5.5293	4.74906	0.00010234	0.0197496	1.40569	4.71788	4.91361	4.9085	5.70707	5.74951	5.94267	5.838	5.84935	5.78616	5.97001	6.02212	6.02427
FKBP5	1.14944	8.19869	4.91816	6.82e-05	0.0161046	1.78203	7.0972	7.55971	7.60846	7.73886	7.47388	8.06321	9.1705	8.77367	9.2774	8.61125	9.00234	8.10011
DCC1	1.10524	4.76465	4.28865	0.000311039	0.0425173	0.375357	3.17902	4.56368	4.58419	4.86219	4.94795	5.36625	5.42355	5.09404	5.18023	5.09856	5.44963	5.09442
FLJ10847	1.10518	4.11958	5.13946	4.02e-05	0.0112949	2.27165	2.57279	3.78903	3.65651	4.48448	4.31205	4.61322	4.66142	4.22699	4.44189	4.34472	4.54727	4.44189
CBLN2	-1.10197	4.78002	-7.28017	3.12e-07	0.000306701	6.70739	5.2741	5.85742	5.80614	4.46196	4.48561	4.61736	4.019	4.04551	3.98251	4.41776	4.597	4.61699
RUNX1	1.09687	5.22713	7.72299	1.23e-07	0.000172309	7.53971	4.11678	4.30546	4.29464	5.87351	5.47518	5.88743	5.81871	5.71004	5.85489	5.53407	5.45418	5.01923
TIPARP	1.07619	6.32877	5.82316	8.04e-06	0.00439684	3.75473	5.36751	5.80696	5.65167	6.35925	6.09108	6.46009	6.95859	6.73106	6.87262	6.66759	6.71072	6.67639
MAN1A1	1.03512	3.45377	5.2202	3.31e-05	0.00959492	2.44928	2.99241	3.14751	2.80381	3.63051	3.17841	3.84147	3.7661	3.73961	3.74577	3.92547	4.30141	3.82219
RBM24	1.03262	4.12088	5.94136	6.12e-06	0.00376354	4.0056	2.96785	3.66837	3.59484	4.60109	4.47625	4.80909	4.40005	4.17044	4.18219	4.27523	4.49026	4.56343
SEC14L2	1.02621	4.09229	5.49162	1.74e-05	0.00742984	3.04187	3.17955	3.39319	3.23341	4.12083	3.958	4.27035	4.23496	3.44335	4.00006	4.66698	4.04184	4.17597
ZBTB16	1.01625	4.34926	5.03363	5.17e-05	0.0133924	2.03797	3.63427	3.89599	3.54646	3.793	3.57607	3.86201	5.56826	4.80003	4.87292	4.82133	4.71618	4.58794
LOC388610	0.989198	5.403	4.83058	8.41e-05	0.0179985	1.58733	4.22831	4.94628	5.05885	4.95832	5.28148	5.08011	7.18631	6.69383	6.77868	6.13942	5.7119	5.34971
HERC5	0.98816	3.48608	5.31206	2.67e-05	0.00919389	2.65066	2.40361	3.21865	2.92569	3.7405	3.86475	3.78122	3.87819	3.89781	3.94795	4.12196	3.82355	3.56693
RAD51	0.978277	4.55293	4.65437	0.00012856	0.0210882	1.19429	3.41752	4.35036	4.24298	4.64787	4.65072	4.86422	5.2089	5.17605	4.95548	5.02128	4.82047	5.10394
SLC7A1	0.977338	5.49452	5.30523	2.71e-05	0.00919389	2.63571	4.27257	5.01908	4.99235	5.93579	5.95248	6.0353	5.82013	5.65022	6.01224	6.04882	5.66583	5.50136
CTPS	0.965699	5.00934	4.66672	0.000124791	0.0210882	1.22188	3.66322	4.61764	4.50272	5.46979	5.48192	5.71964	5.53502	5.35533	5.16003	5.02713	5.4496	5.20395
KCNF1	0.960745	4.61444	4.87442	7.57e-05	0.0165598	1.68486	4.29817	3.87273	3.939	5.55704	5.59438	5.05285	4.79156	4.87717	4.67112	5.26943	4.87182	4.85088
PTGES	0.940845	6.86731	5.08555	4.57e-05	0.0124878	2.15272	6.05962	5.89725	6.02966	7.92721	7.76831	7.49687	6.65557	6.46218	6.9784	7.1551	6.55876	7.0952
GPSM2	0.936529	6.92506	5.54331	1.55e-05	0.00742984	3.15385	6.27072	6.57198	6.53317	6.55721	6.43508	6.9089	7.73665	7.44787	7.5345	7.43441	7.49636	7.25469
EXO1	0.922066	5.83809	5.23868	3.17e-05	0.00959492	2.48987	4.79215	5.57776	5.3704	6.06467	6.09334	6.12982	6.43613	6.28843	6.38391	6.21475	6.1541	6.13766
DSCR6	0.916539	6.88254	4.5356	0.000171226	0.0259262	0.928645	5.97689	6.54935	6.61084	6.53458	6.73613	6.87075	7.5406	7.41814	7.31057	7.06102	7.37291	7.45277
HSPB8	0.897876	6.99784	5.49152	1.74e-05	0.00742984	3.04166	6.19451	6.28171	6.24626	7.96597	7.94136	8.10574	7.01177	6.68518	6.89242	7.46249	7.03532	6.9183
CDCA5	0.897552	8.71437	5.06676	4.78e-05	0.0127078	2.11121	7.94844	8.19907	8.41093	8.83354	8.65855	9.06214	9.45393	8.85714	9.09233	8.95562	9.38482	8.91065
SSBP1	-0.893906	6.63013	-8.59436	2.11e-08	5.19e-05	9.08557	6.79332	6.9111	6.90536	6.83589	6.85577	6.90964	6.76378	6.85038	6.87911	5.98297	5.97636	5.96874
P4HA2	0.892285	7.14658	4.724	0.000108703	0.0197958	1.34979	5.99565	6.91686	6.63508	7.29975	7.00801	7.32822	8.13109	7.86716	7.6911	7.38333	7.25467	7.58645
SUSD3	0.888005	3.56923	4.61886	0.000140053	0.0222323	1.11493	2.50452	2.92735	2.82714	4.88566	4.91637	4.36379	3.26133	2.6501	3.63043	3.52405	3.70383	3.69515
POLQ	0.863754	4.66963	4.7127	0.000111704	0.0197958	1.32456	3.84101	4.27825	4.33292	4.68751	4.85936	4.93957	5.15678	5.09725	5.1541	5.08014	5.20846	4.75484
FGD3	0.851708	4.22145	5.43658	1.99e-05	0.0075179	2.9223	3.6407	3.36728	3.59972	5.2148	5.20009	5.12198	3.8411	3.51408	3.54488	4.57968	4.51203	4.07111
CHPT1	0.847504	8.08934	5.49403	1.73e-05	0.00742984	3.0471	7.19832	7.70934	7.4924	8.13194	8.18001	8.00433	8.52902	8.49963	8.45423	8.47661	8.09616	8.3698
TRIP13	0.843471	7.61797	4.81392	8.76e-05	0.0183352	1.55023	6.69028	7.26432	7.26323	7.79567	7.73443	8.08994	8.18911	7.90973	8.03717	7.68819	8.219	7.84104
KCTD6	0.837667	4.25635	4.25677	0.000335973	0.0446512	0.303905	3.35054	3.74499	3.52788	5.10412	4.98602	5.30399	3.92937	3.29767	3.92044	3.91167	4.63348	4.59126
ZFP36	0.810319	6.7575	4.90634	7.01e-05	0.0161046	1.75579	6.28104	6.39293	6.43576	6.75928	6.73509	6.93375	7.10066	6.77046	6.93971	7.07105	7.30102	7.16861
DEGS1	0.79386	6.93226	5.78287	8.83e-06	0.00457367	3.66882	6.17388	6.71589	6.27188	7.13182	6.96189	7.25791	7.47764	7.32696	7.44993	7.15392	7.27579	7.11352
SERPINA6	0.78672	8.37999	4.78258	9.44e-05	0.0189706	1.48041	7.62155	7.50101	7.37103	9.45999	9.67414	9.59426	7.63094	7.98947	7.81695	8.16019	8.03111	8.66246
KCNG1	0.786455	5.00796	4.94316	6.42e-05	0.0161046	1.83752	4.72309	4.71882	4.52157	4.87641	5.01691	4.49298	6.3695	6.1987	6.48506	5.61917	5.51806	5.18561
NDP	-0.78633	3.84526	-4.7013	0.000114812	0.0198243	1.29912	4.26793	4.78332	4.69866	3.58505	3.51988	3.54578	3.81163	3.05698	3.74257	3.72331	3.84724	3.82037
ACSL1	0.781656	5.75368	4.35463	0.000265168	0.0383792	0.523221	5.07596	5.54131	5.57011	5.32931	5.37012	5.84538	6.70154	6.34164	6.57557	6.35789	6.10735	6.06711
SLC25A18	0.764338	5.60653	6.40192	2.14e-06	0.00162159	4.96511	5.62186	5.32944	5.33332	5.10806	5.09226	5.00484	7.0549	6.95726	6.96907	6.1371	6.30987	6.13067
GJB2	0.761514	3.4938	4.59036	0.000150022	0.0234368	1.05119	2.91499	3.17493	3.43709	3.48091	3.4028	3.83941	3.88557	3.62026	3.65496	3.7817	4.0686	3.96125
POLE2	0.758587	6.1134	4.78242	9.44e-05	0.0189706	1.48006	5.19771	5.88317	5.6703	6.30501	6.21733	6.43193	6.65671	6.56435	6.59549	6.1271	6.4686	6.43124
CCL2	-0.742246	3.38931	-4.76528	9.84e-05	0.0193734	1.44187	4.18133	3.7515	3.99596	3.28484	3.54909	3.25071	3.01273	2.66221	3.02	3.04044	3.24863	3.41298
FAM57A	0.737815	4.61454	6.36616	2.32e-06	0.00163212	4.89168	3.94634	4.24625	4.13218	4.98612	5.01467	5.01065	5.09543	5.1174	5.01446	4.78336	5.02701	4.72785
C10orf33	-0.734321	4.36914	-4.34355	0.000272363	0.0388493	0.498408	5.00241	4.84104	4.89878	3.79924	3.94007	3.95143	3.78628	4.0278	3.82386	4.03115	4.23275	4.27537
LRRFIP2	0.727512	4.25093	4.33362	0.000278983	0.039225	0.476152	3.58008	3.86674	3.69566	4.4183	4.43085	4.39797	4.98732	4.49814	4.46062	4.52375	4.37257	4.42871
CCND3	0.720004	8.98736	4.44005	0.00021569	0.0321639	0.714646	8.66331	8.55381	8.62305	9.1812	9.208	8.88478	9.44498	9.38556	9.36733	9.6207	9.17332	9.20616
DTL	0.719221	7.47603	4.90499	7.04e-05	0.0161046	1.75278	7.05542	7.15401	6.98702	7.6812	7.50552	7.77251	7.6514	7.71106	7.85096	7.79778	7.79668	7.75965
FAM113B	-0.714681	3.66867	-5.24387	3.13e-05	0.00959492	2.50126	4.3022	4.1495	4.19243	3.67271	3.52194	3.23524	3.31559	3.64349	3.28113	3.49065	3.48069	3.52875
BAMBI	-0.690243	8.8921	-5.45822	1.89e-05	0.00742984	2.96935	9.29813	9.68625	9.55168	8.61104	8.56953	8.68151	8.55928	8.46176	8.53405	8.80228	8.98172	8.68133
CDCA4	0.684752	6.11971	4.90968	6.96e-05	0.0161046	1.7632	5.59879	5.70511	5.77229	6.29616	6.26695	6.18182	6.60244	6.31	6.4651	6.52047	6.39652	6.21347
HCAP-G	0.672308	6.70542	4.62159	0.000139135	0.0222323	1.12102	6.33836	6.39747	6.26712	6.82304	6.81288	7.0786	6.92463	7.06164	7.11757	6.8271	7.26759	6.92519
SIAH2	0.669741	5.31827	4.25153	0.00034026	0.0446512	0.292156	4.49314	4.85626	4.63199	5.99454	6.04387	5.98028	5.44199	4.90332	4.9639	5.49786	5.19334	5.2994
Pfs2	0.66702	10.3068	5.47284	1.82e-05	0.00742984	3.00112	9.69919	10.0053	9.95717	10.3992	10.3474	10.3413	10.9619	10.955	10.8898	10.7615	10.4565	10.4447
ARL4D	-0.660849	3.7965	-5.36784	2.34e-05	0.00851491	2.77254	4.21286	4.49273	4.31664	3.4337	3.63325	3.46035	3.69391	3.60956	3.75235	3.58005	3.78381	3.67582
BRI3BP	0.657667	5.97993	4.65915	0.000127086	0.0210882	1.20498	5.57559	5.47432	5.52591	6.13562	6.15174	6.32739	6.25409	6.24835	6.25043	6.19901	6.19575	6.15406
SLBP	0.655245	5.85988	4.23408	0.000354926	0.0447844	0.25306	5.48646	5.627	5.33622	6.00299	6.0096	5.93668	6.33558	6.39613	6.05262	6.14669	6.27091	5.99782
SGK3	0.652413	3.96464	4.70925	0.000112636	0.0197958	1.31686	3.48416	3.55101	3.5094	4.34125	4.25947	4.322	3.93494	3.54475	3.84329	4.14583	4.25496	4.10103
FAM105A	0.643377	3.93375	5.28285	2.86e-05	0.00937159	2.58671	3.6811	3.51481	3.56418	3.89834	3.76479	3.87322	4.67263	4.64092	4.41864	4.30737	4.077	4.30585
POLA2	0.639262	6.88849	4.24378	0.000346698	0.0447624	0.27479	6.73624	6.44137	6.56038	7.12443	7.11557	6.85171	7.48109	7.22545	7.31424	7.20989	7.31645	7.12943
ANGPTL4	-0.637994	5.16509	-4.7177	0.000110365	0.0197958	1.33573	5.61853	5.55725	5.60906	4.85763	4.76942	4.69759	5.59907	5.33126	5.33625	5.06613	5.08379	4.72093
SERPINA3	0.624974	4.55424	4.41786	0.000227573	0.0334295	0.664932	4.02214	4.12027	4.18938	4.60594	4.64277	4.2332	5.73425	5.41467	5.44173	4.74513	4.82215	4.63942
FLJ13912	0.614211	5.24143	4.20855	0.000377528	0.0470333	0.195868	4.52838	5.01762	4.85629	5.52562	5.2815	5.43981	5.54671	5.60701	5.62711	5.3031	5.38797	5.55385
C1orf135	0.608358	4.46458	4.73563	0.000105702	0.0197958	1.37574	4.23423	4.21623	4.01811	4.73918	4.65139	4.71644	4.43395	4.64778	4.62441	4.75089	4.90695	4.63581
C17orf53	0.606454	5.99773	4.32711	0.000283411	0.0392863	0.461558	5.53377	5.59617	5.63555	6.15043	6.3176	6.05714	6.51231	6.41078	6.28502	6.10752	6.44344	6.0339
LAD1	0.602503	6.72347	4.23962	0.000350204	0.0447624	0.265469	6.34673	6.42084	6.51625	6.75148	6.81181	6.87455	7.07207	7.01483	7.04084	7.21091	7.11767	6.76273
C6orf165	-0.596617	4.24759	-4.54465	0.000167527	0.0257625	0.948891	4.48857	4.81873	4.75699	3.87374	4.0227	4.205	3.80937	3.95575	3.69588	4.01719	4.22408	4.03317
SEMA6A	0.569307	3.99942	4.26514	0.000329235	0.0443881	0.322676	3.41497	3.42133	3.43115	4.76508	4.72245	5.02622	3.85827	3.67236	3.73533	4.14971	3.95959	3.86607
RASSF1	0.567285	5.51435	4.20167	0.000383866	0.0472251	0.180445	4.81011	5.21915	5.07835	5.68036	5.60976	5.91009	6.12474	5.69741	5.87061	5.49897	5.59696	5.71354
