# Supplementary material for: The unique transcriptional response produced by concurrent estrogen and progesterone treatment in breast cancer cells results in upregulation of growth factor pathways and switching from a Luminal A to a Basal-like subtype
Source: BMC Cancer. 2015 Oct 24;15:791. doi: 10.1186/s12885-015-1819-3 (PMC4620010; doi:10.1186/s12885-015-1819-3)
Supplement: Additional file 9: — BED files of the sites found to be enriched ZR-75-1 cells in E2 pretreated + P4 cells and in cells treated with P4 treatment alone. (XLS 510 kb) [file 12885_2015_1819_MOESM9_ESM.xls]

## Sheet: Additional file 9
A. PR E2p + P4 site calls							B. PR P4 alone site calls
Chromosome	Start	End	Site name	Reads			Chromosome	Start	End	Site name	Reads
chr2	69692474	69693056	PR-chr2-29552	548			chr2	69692474	69693060	PRonly-chr2-32041	507
chr4	6685594	6686414	PR-chr4-2856	251.663			chr4	81141315	81141885	PRonly-chr4-31592	45
chr17	71056721	71058126	PR-chr17-30489	236.471			chr1	145509111	145510015	PRonly-chr1-44106	30.522
chr8	37840230	37841946	PR-chr8-16188	188.106			chr17	42589025	42590937	PRonly-chr17-15848	30.051
chr20	57834674	57835622	PR-chr20-24151	164.708			chr10	68611379	68611949	PRonly-chr10-27915	30
chr22	28242721	28245688	PR-chr22-6379	160.345			chr3	98088143	98088740	PRonly-chr3-40130	27
chr3	128505425	128506889	PR-chr3-48051	155.029			chr21	43558871	43559949	PRonly-chr21-10412	19
chr20	44776065	44777009	PR-chr20-17072	149.117			chr19	60661808	60662992	PRonly-chr19-19470	17
chr1	145047890	145049375	PR-chr1-40712	143.085			chr15	73255675	73256269	PRonly-chr15-25996	15
chr20	31775826	31776454	PR-chr20-10456	135.019			chr8	85679297	85680028	PRonly-chr8-38046	15
chr11	113555003	113555783	PR-chr11-40307	134.831			chr2	182404275	182404848	PRonly-chr2-77567	14
chr17	72152717	72153718	PR-chr17-31154	132.656			chr16	69726790	69728388	PRonly-chr16-27065	13.059
chr12	56561056	56562188	PR-chr12-26525	129.509			chr12	50806295	50806924	PRonly-chr12-25306	13
chr1	167308458	167310375	PR-chr1-51691	122.162			chr14	94135151	94135735	PRonly-chr14-33686	13
chr1	213807794	213809211	PR-chr1-77826	118.771			chr2	164046464	164047009	PRonly-chr2-69066	13
chr6	159252505	159253290	PR-chr6-53104	116.83			chr6	34787147	34787715	PRonly-chr6-14872	13
chr11	68646343	68648237	PR-chr11-24490	112.814			chr22	19986089	19986844	PRonly-chr22-2343	12.481
chr9	111990961	111991735	PR-chr9-32829	110.126			chr6	20760065	20761044	PRonly-chr6-9133	12.405
chr12	11600303	11601005	PR-chr12-6413	109.636			chr12	68340813	68342843	PRonly-chr12-34128	12
chr1	210725208	210727747	PR-chr1-75904	108.24			chr5	69929680	69930268	PRonly-chr5-28315	12
chr5	148845358	148846143	PR-chr5-56936	106.989			chr2	113611971	113613914	PRonly-chr2-47423	11.995
chr6	35802357	35804079	PR-chr6-13917	106.939			chr16	45047133	45047807	PRonly-chr16-15692	11.966
chr11	68629818	68632439	PR-chr11-24480	104.105			chr1	230188418	230190024	PRonly-chr1-92671	11.859
chr7	29461546	29462683	PR-chr7-16575	104.082			chr2	132513546	132514249	PRonly-chr2-54928	11.761
chr14	94134454	94135952	PR-chr14-31175	102.219			chr12	26675984	26677727	PRonly-chr12-15167	11.724
chr18	17163983	17164798	PR-chr18-7142	101.054			chr1	220270585	220272186	PRonly-chr1-86746	11.219
chr20	31783645	31784677	PR-chr20-10460	99.795			chr1	201250804	201251968	PRonly-chr1-74676	11.013
chr3	158016612	158018212	PR-chr3-59760	98.411			chr10	74866666	74867185	PRonly-chr10-30891	11
chr6	3614483	3615644	PR-chr6-1524	97.933			chr16	69447891	69448291	PRonly-chr16-26902	11
chr1	231907054	231908109	PR-chr1-88879	97.743			chr7	18928725	18931479	PRonly-chr7-10773	11
chr4	6803359	6804096	PR-chr4-2914	96.737			chr2	145022353	145022747	PRonly-chr2-60708	10.992
chr16	10521713	10522333	PR-chr16-5624	95.714			chr5	81862074	81862580	PRonly-chr5-33425	10.983
chr19	45449876	45450564	PR-chr19-13055	95.687			chr2	126745402	126745892	PRonly-chr2-52895	10.956
chr12	6957663	6958391	PR-chr12-4377	94.168			chr22	22094079	22094654	PRonly-chr22-3407	10.927
chr1	154852768	154853392	PR-chr1-45243	93.486			chr1	202636457	202637476	PRonly-chr1-75592	10.903
chr2	238132151	238132884	PR-chr2-94287	91.7			chr6	57483152	57483687	PRonly-chr6-24812	10.835
chr1	207770530	207773000	PR-chr1-74161	91.433			chrX	56080127	56080829	PRonly-chrX-21033	10.708
chr1	183115962	183117289	PR-chr1-60498	91.242			chr12	37600612	37601135	PRonly-chr12-19589	10.409
chr16	4141874	4143047	PR-chr16-2373	87.767			chr2	8303033	8303729	PRonly-chr2-4059	10.38
chr8	99807490	99808426	PR-chr8-41845	87.152			chr1	232287665	232289685	PRonly-chr1-94017	10.261
chr10	97023095	97023949	PR-chr10-37946	86.422			chr10	41951976	41952796	PRonly-chr10-17576	10.186
chr1	144253888	144255511	PR-chr1-40507	85.831			chr5	2987038	2987952	PRonly-chr5-1560	10.186
chr18	44232636	44234308	PR-chr18-20609	84.506			chr1	213949740	213950430	PRonly-chr1-82718	10.146
chr2	70056140	70058801	PR-chr2-29700	83.857			chr10	127564737	127567168	PRonly-chr10-57632	10.029
chr7	16886492	16887407	PR-chr7-9051	83.389			chr1	227845729	227846932	PRonly-chr1-91164	10.009
chr1	94981626	94982671	PR-chr1-30935	82.961			chr12	18739759	18740977	PRonly-chr12-10705	10
chr12	7940470	7941063	PR-chr12-4760	82.903			chr12	30004474	30005722	PRonly-chr12-17056	10
chr14	90694136	90694927	PR-chr14-29442	82.744			chr12	59628851	59629665	PRonly-chr12-29348	10
chr17	58250718	58251410	PR-chr17-23123	81.533			chr16	33750722	33751324	PRonly-chr16-15305	10
chr22	18217036	18217663	PR-chr22-1423	80.669			chr18	75044727	75045393	PRonly-chr18-39341	10
chr3	184316439	184317228	PR-chr3-69757	80.519			chr1	61055493	61056073	PRonly-chr1-22228	10
chr8	110674349	110675203	PR-chr8-47024	79.198			chr1	152365067	152365666	PRonly-chr1-47169	10
chr12	131580052	131581443	PR-chr12-57799	78.202			chr1	200970464	200971694	PRonly-chr1-74492	10
chr4	185971246	185972413	PR-chr4-68220	76.693			chr22	31213132	31214023	PRonly-chr22-8508	10
chr10	126310528	126311666	PR-chr10-52301	76.203			chr2	31438351	31438909	PRonly-chr2-14977	10
chr1	143957426	143958019	PR-chr1-40364	76			chr2	137708971	137709727	PRonly-chr2-57292	10
chr7	14055591	14056624	PR-chr7-7445	74.911			chr6	170730916	170731417	PRonly-chr6-63762	10
chr14	76720236	76721833	PR-chr14-22653	74.165			chr7	25292156	25292908	PRonly-chr7-14430	10
chr18	9356048	9356718	PR-chr18-4377	73.934			chr8	57878567	57879147	PRonly-chr8-24588	10
chr7	30557007	30557912	PR-chr7-17178	73.812			chr8	61760608	61761973	PRonly-chr8-26506	10
chr8	29434182	29435061	PR-chr8-12163	73.723			chr8	70186003	70187074	PRonly-chr8-30636	10
chr5	125853676	125854298	PR-chr5-47303	73.385			chr9	46194759	46195406	PRonly-chr9-16858	10
chr1	153256208	153257979	PR-chr1-44413	72.725			chrX	83477144	83477680	PRonly-chrX-26301	10
chr1	116720320	116721615	PR-chr1-37835	72.582			chrX	145737377	145737928	PRonly-chrX-46214	10
chr20	32321500	32322260	PR-chr20-10713	72.515			chr14	80142458	80143024	PRonly-chr14-26392	9.99
chr17	55284047	55284716	PR-chr17-21764	72.176			chr15	85034686	85035755	PRonly-chr15-31448	9.99
chr5	154428163	154429338	PR-chr5-59350	71.777			chr16	72196181	72197128	PRonly-chr16-28274	9.966
chr20	49775429	49776222	PR-chr20-19795	71.705			chr12	82054320	82055044	PRonly-chr12-40369	9.963
chr11	1804862	1806034	PR-chr11-456	71.498			chr3	119409983	119410498	PRonly-chr3-49242	9.945
chr1	173826085	173827550	PR-chr1-54939	71.038			chr12	63518359	63519440	PRonly-chr12-31270	9.91
chr1	206417373	206418744	PR-chr1-73267	70.997			chr16	49395295	49395945	PRonly-chr16-17542	9.879
chr1	173554480	173555427	PR-chr1-54744	69.237			chr1	225907782	225910610	PRonly-chr1-90007	9.855
chr6	168924782	168925514	PR-chr6-56579	68.963			chr5	7515583	7516267	PRonly-chr5-3887	9.855
chr12	50806348	50807194	PR-chr12-23814	68.515			chr1	226346925	226347787	PRonly-chr1-90256	9.806
chr9	123174675	123176007	PR-chr9-37556	68.262			chr6	12861548	12862251	PRonly-chr6-5645	9.77
chr7	99390797	99391768	PR-chr7-43060	68.03			chr4	33751916	33752441	PRonly-chr4-14652	9.735
chr12	6944430	6949228	PR-chr12-4368	68.006			chr20	58928086	58928950	PRonly-chr20-26060	9.638
chr14	68106008	68107242	PR-chr14-18825	67.85			chr5	98954815	98955256	PRonly-chr5-40696	9.638
chr8	29506912	29508716	PR-chr8-12208	67.815			chr9	111991006	111991687	PRonly-chr9-35396	9.545
chr1	160121443	160122575	PR-chr1-47835	67.799			chr9	112983002	112983863	PRonly-chr9-35812	9.527
chr8	29488158	29488990	PR-chr8-12196	67.653			chr16	32537931	32539145	PRonly-chr16-14990	9.493
chr6	53438286	53439524	PR-chr6-20935	67.505			chr1	223221566	223222292	PRonly-chr1-88474	9.486
chr3	14265436	14266062	PR-chr3-5904	67.436			chr1	198835789	198836507	PRonly-chr1-72974	9.405
chr13	44342494	44343613	PR-chr13-10201	66.731			chr1	230394976	230395716	PRonly-chr1-92801	9.403
chr11	34803346	34804199	PR-chr11-13738	65.893			chr13	45522911	45524727	PRonly-chr13-11453	9.359
chr16	68923228	68923875	PR-chr16-25106	65.822			chr3	3626859	3627539	PRonly-chr3-1656	9.354
chr9	119202065	119203115	PR-chr9-35853	65.633			chr1	89343693	89344946	PRonly-chr1-31412	9.336
chrX	16590244	16590970	PR-chrX-6172	65.25			chr12	26515440	26516877	PRonly-chr12-15060	9.317
chr11	67669284	67671632	PR-chr11-23873	65.125			chr18	13655225	13656079	PRonly-chr18-7028	9.296
chr12	93479767	93480470	PR-chr12-42230	64.892			chr2	91150670	91151507	PRonly-chr2-40009	9.197
chr4	78704175	78704960	PR-chr4-28080	64.489			chr1	150859959	150860503	PRonly-chr1-46329	9.183
chr17	53372928	53373950	PR-chr17-20814	63.93			chr12	27309050	27309772	PRonly-chr12-15526	9.169
chr2	223025010	223025950	PR-chr2-87707	63.422			chr12	70780445	70782774	PRonly-chr12-35561	9.156
chr9	74120098	74121295	PR-chr9-17687	63.294			chr1	218153082	218153973	PRonly-chr1-85418	9.114
chr12	68119901	68121380	PR-chr12-32099	63.207			chr4	78703864	78704933	PRonly-chr4-30553	9.071
chr5	134570613	134571261	PR-chr5-50693	63.14			chr1	48818169	48818718	PRonly-chr1-18068	9.059
chr16	80195922	80196573	PR-chr16-30175	63.031			chr5	77394246	77395059	PRonly-chr5-31467	9.051
chr2	233227685	233228847	PR-chr2-91961	62.891			chr12	21770301	21771586	PRonly-chr12-12322	9.039
chr1	17513230	17515114	PR-chr1-6200	62.859			chr5	167629904	167630486	PRonly-chr5-70765	9.037
chr11	120012897	120013852	PR-chr11-42874	62.843			chr12	8688344	8689574	PRonly-chr12-5256	9.019
chr2	211969465	211970311	PR-chr2-82623	62.579			chr7	38627597	38628358	PRonly-chr7-22725	9.015
chr1	153472316	153473217	PR-chr1-44544	62.431			chr8	66490897	66492039	PRonly-chr8-28872	9.009
chr1	227431353	227432821	PR-chr1-86057	62.231			chr1	174267354	174268166	PRonly-chr1-59203	9.002
chr15	73255546	73256289	PR-chr15-23717	61.849			chr10	116044963	116045538	PRonly-chr10-51330	9
chr17	46122018	46123231	PR-chr17-17028	61.736			chr11	7132366	7133210	PRonly-chr11-2747	9
chr9	132826895	132827566	PR-chr9-41773	61.498			chr11	16276024	16276653	PRonly-chr11-6946	9
chr18	55397603	55398373	PR-chr18-26481	61.045			chr11	40206115	40206770	PRonly-chr11-17173	9
chr1	37737259	37738169	PR-chr1-13472	61.026			chr12	71341676	71342196	PRonly-chr12-35887	9
chr8	29654180	29655045	PR-chr8-12289	60.807			chr12	78341208	78342030	PRonly-chr12-38864	9
chr16	14635275	14635981	PR-chr16-7641	60.723			chr12	90071745	90072420	PRonly-chr12-43449	9
chr5	71078835	71080856	PR-chr5-25813	60.419			chr12	102684046	102684474	PRonly-chr12-48966	9
chr7	29218696	29219531	PR-chr7-16396	60.328			chr13	94630947	94631505	PRonly-chr13-31495	9
chr10	5585561	5588330	PR-chr10-2621	59.987			chr14	57283070	57284013	PRonly-chr14-15748	9
chrX	40245121	40246153	PR-chrX-15012	59.971			chr15	98985547	98986141	PRonly-chr15-38892	9
chr1	225069325	225070252	PR-chr1-84749	59.493			chr15	99051990	99052503	PRonly-chr15-38926	9
chr8	54571743	54572391	PR-chr8-21508	59.342			chr16	33749239	33749838	PRonly-chr16-15304	9
chr5	93723075	93724146	PR-chr5-35037	59.068			chr18	46821188	46821882	PRonly-chr18-23837	9
chr1	148806854	148807891	PR-chr1-41963	58.992			chr1	11012738	11013483	PRonly-chr1-4230	9
chr6	34538145	34538960	PR-chr6-13388	58.393			chr1	171129826	171131143	PRonly-chr1-57540	9
chr20	48940610	48941849	PR-chr20-19298	58.34			chr1	185057272	185057898	PRonly-chr1-65848	9
chr12	119402152	119402948	PR-chr12-52724	58.21			chr1	189809786	189810289	PRonly-chr1-68331	9
chr1	221906341	221909061	PR-chr1-82941	58.043			chr1	190526482	190528252	PRonly-chr1-68705	9
chr7	47797604	47798636	PR-chr7-26551	58.037			chr1	215867229	215869439	PRonly-chr1-84002	9
chr10	79301597	79304054	PR-chr10-30723	57.957			chr1	222642993	222645154	PRonly-chr1-88117	9
chr7	158348974	158349854	PR-chr7-66574	57.736			chr1	223114152	223114541	PRonly-chr1-88422	9
chr11	69640099	69642102	PR-chr11-25188	57.65			chr1	240902270	240903114	PRonly-chr1-99331	9
chr16	87103399	87104805	PR-chr16-33505	57.531			chr21	29812164	29812678	PRonly-chr21-5047	9
chr13	108204147	108204878	PR-chr13-35062	57.515			chr22	30955799	30956604	PRonly-chr22-8358	9
chr10	14653900	14654574	PR-chr10-6752	57.191			chr2	36381965	36382524	PRonly-chr2-16874	9
chr11	70568391	70569270	PR-chr11-25779	57.188			chr2	121974796	121975578	PRonly-chr2-51017	9
chr18	18447067	18448297	PR-chr18-7767	57.179			chr2	150998945	150999527	PRonly-chr2-63339	9
chr17	55269385	55271270	PR-chr17-21756	56.901			chr2	176887614	176888171	PRonly-chr2-74902	9
chr1	166867189	166868653	PR-chr1-51439	56.676			chr2	212284856	212285355	PRonly-chr2-90205	9
chr2	11565563	11566503	PR-chr2-5342	56.67			chr2	222158500	222159081	PRonly-chr2-94979	9
chr8	141668638	141671384	PR-chr8-61958	56.446			chr3	4705128	4705645	PRonly-chr3-2107	9
chr20	60787687	60788577	PR-chr20-25937	56.403			chr4	58616095	58616667	PRonly-chr4-23341	9
chr15	71077407	71079441	PR-chr15-22651	56.31			chr4	111307069	111307643	PRonly-chr4-43921	9
chr4	183114503	183115908	PR-chr4-66884	56.209			chr5	20039868	20040466	PRonly-chr5-9561	9
chr21	37940413	37941598	PR-chr21-7424	55.866			chr5	94703662	94704230	PRonly-chr5-38956	9
chr12	62581152	62581996	PR-chr12-28921	55.864			chr5	101741489	101742061	PRonly-chr5-41610	9
chr12	5075848	5076534	PR-chr12-3176	55.694			chr5	103840377	103840869	PRonly-chr5-42488	9
chr1	227433501	227434181	PR-chr1-86058	55.642			chr6	38289007	38289521	PRonly-chr6-16393	9
chr9	109850795	109851867	PR-chr9-31802	55.631			chr6	53438409	53438991	PRonly-chr6-23080	9
chr2	45899176	45900392	PR-chr2-19781	55.381			chr6	72690515	72691029	PRonly-chr6-28868	9
chr7	107213376	107214114	PR-chr7-46055	55.07			chr8	3405443	3405981	PRonly-chr8-1648	9
chr2	27090553	27091968	PR-chr2-11893	55			chr8	5295501	5295995	PRonly-chr8-2617	9
chr17	69368086	69368840	PR-chr17-29486	54.962			chr8	74149856	74150791	PRonly-chr8-32648	9
chr2	218260119	218261230	PR-chr2-85469	54.705			chr8	112696088	112696640	PRonly-chr8-51324	9
chr12	96486379	96487239	PR-chr12-43447	54.698			chr8	118365746	118366291	PRonly-chr8-54161	9
chr22	39458549	39459272	PR-chr22-11345	54.567			chr8	126035084	126035804	PRonly-chr8-58315	9
chr20	49170817	49172229	PR-chr20-19432	54.443			chr8	129936329	129936850	PRonly-chr8-60391	9
chr12	616880	617647	PR-chr12-355	54.36			chr8	137798284	137798643	PRonly-chr8-64649	9
chr18	19559303	19560318	PR-chr18-8295	53.994			chrX	54212420	54213182	PRonly-chrX-20538	9
chr6	170272362	170273576	PR-chr6-57123	53.965			chr1	169495622	169496404	PRonly-chr1-56654	8.999
chr19	46118517	46119719	PR-chr19-13318	53.945			chr16	24076582	24077356	PRonly-chr16-11634	8.998
chr8	41580682	41581422	PR-chr8-17723	53.907			chr1	209557304	209558049	PRonly-chr1-80005	8.997
chr17	73718610	73719557	PR-chr17-32099	53.903			chr15	51473034	51474774	PRonly-chr15-14629	8.993
chr3	37769417	37770559	PR-chr3-14826	53.805			chr8	109092763	109093887	PRonly-chr8-49713	8.993
chr1	162814988	162815779	PR-chr1-49151	53.777			chr4	175930963	175931551	PRonly-chr4-70163	8.992
chr2	95071963	95072667	PR-chr2-37122	53.695			chr1	178535038	178536114	PRonly-chr1-61743	8.99
chr10	29435025	29435757	PR-chr10-12459	53.636			chr9	126459339	126459918	PRonly-chr9-42020	8.989
chr9	72285099	72286443	PR-chr9-16910	53.576			chr5	136347597	136348461	PRonly-chr5-56200	8.987
chr13	32562558	32563576	PR-chr13-5245	53.059			chr2	123643716	123644585	PRonly-chr2-51700	8.985
chr12	61553065	61553776	PR-chr12-28537	52.749			chr2	28581501	28582097	PRonly-chr2-13552	8.984
chr11	69572202	69573061	PR-chr11-25134	52.196			chr7	11387602	11388156	PRonly-chr7-6325	8.978
chr11	68061997	68063096	PR-chr11-24133	52.081			chr15	58032485	58033505	PRonly-chr15-17752	8.968
chr8	37828532	37830295	PR-chr8-16179	52.08			chr12	28011215	28011940	PRonly-chr12-15983	8.96
chr11	128699339	128700223	PR-chr11-46366	51.906			chr10	86931400	86932193	PRonly-chr10-36652	8.959
chr13	39708234	39709135	PR-chr13-8178	51.9			chr16	47204444	47204857	PRonly-chr16-16517	8.954
chr3	39146534	39147549	PR-chr3-15383	51.874			chr4	147330436	147330932	PRonly-chr4-58104	8.954
chr5	35241062	35241993	PR-chr5-13845	51.825			chr7	33586220	33587810	PRonly-chr7-19681	8.948
chr20	19638857	19639539	PR-chr20-6679	51.803			chr1	143822854	143824666	PRonly-chr1-43421	8.947
chr18	17878110	17879257	PR-chr18-7454	51.768			chr16	23925250	23927417	PRonly-chr16-11549	8.942
chr1	18925300	18926091	PR-chr1-6798	51.632			chr1	214287679	214289031	PRonly-chr1-82952	8.939
chrX	16517131	16518003	PR-chrX-6133	51.368			chr8	79023212	79023911	PRonly-chr8-34959	8.937
chr13	109544919	109545577	PR-chr13-35694	51.027			chr9	15201257	15201819	PRonly-chr9-6632	8.937
chr20	25238861	25239784	PR-chr20-8928	50.991			chr4	61000936	61001937	PRonly-chr4-24089	8.935
chr2	70569740	70570612	PR-chr2-29916	50.903			chrX	40245531	40246134	PRonly-chrX-16231	8.934
chr11	65713078	65713965	PR-chr11-22881	50.779			chr5	71500407	71501144	PRonly-chr5-28691	8.931
chr19	34853757	34854707	PR-chr19-8683	50.661			chr3	36519126	36519639	PRonly-chr3-15781	8.927
chr12	92731675	92733099	PR-chr12-41946	50.61			chr7	4188556	4189104	PRonly-chr7-2495	8.927
chr2	229979972	229980651	PR-chr2-90607	50.563			chr12	50909276	50909863	PRonly-chr12-25366	8.926
chr13	43782983	43783666	PR-chr13-9947	50.324			chr22	28243584	28244158	PRonly-chr22-6859	8.92
chr13	32591907	32592720	PR-chr13-5263	50.314			chr2	184976069	184976578	PRonly-chr2-78544	8.915
chr14	68083104	68084966	PR-chr14-18812	50.071			chr1	203324796	203325258	PRonly-chr1-76110	8.912
chr5	69929670	69930267	PR-chr5-25641	50			chr16	69609023	69610074	PRonly-chr16-26994	8.911
chr3	125450042	125450991	PR-chr3-46767	49.955			chr18	62099553	62100397	PRonly-chr18-32302	8.907
chr5	66071295	66072294	PR-chr5-24422	49.947			chr8	42517410	42518024	PRonly-chr8-19599	8.906
chr1	206058215	206059918	PR-chr1-73008	49.94			chr9	3907229	3907733	PRonly-chr9-1763	8.903
chr1	117612592	117613532	PR-chr1-38425	49.927			chr8	129238454	129239517	PRonly-chr8-60011	8.894
chr5	80321914	80322729	PR-chr5-29745	49.87			chr16	3310556	3310992	PRonly-chr16-1909	8.89
chr16	12138610	12139197	PR-chr16-6421	49.753			chr8	41578039	41578787	PRonly-chr8-18979	8.879
chr18	13211884	13213826	PR-chr18-6241	49.712			chr6	54929891	54930770	PRonly-chr6-23731	8.875
chr7	872997	874802	PR-chr7-375	49.654			chr5	73807866	73809096	PRonly-chr5-29883	8.873
chr8	42257104	42257994	PR-chr8-18143	49.59			chr8	119101086	119101722	PRonly-chr8-54588	8.863
chr22	20446991	20448059	PR-chr22-2327	49.533			chr12	71047074	71048255	PRonly-chr12-35719	8.855
chr17	35077135	35078853	PR-chr17-11847	49.378			chr6	62586159	62586660	PRonly-chr6-25285	8.854
chr2	11596838	11597547	PR-chr2-5360	49.351			chr1	185212678	185214129	PRonly-chr1-65950	8.851
chr20	24945807	24946497	PR-chr20-8808	49.333			chr8	85344716	85345253	PRonly-chr8-37881	8.851
chr1	150232573	150233687	PR-chr1-42733	49.183			chr1	239442909	239443509	PRonly-chr1-98435	8.848
chr20	41911711	41912465	PR-chr20-15593	49.103			chr8	116371219	116372115	PRonly-chr8-52974	8.847
chr2	62505471	62506106	PR-chr2-26486	48.881			chr3	602255	602899	PRonly-chr3-301	8.845
chr17	2224760	2225377	PR-chr17-749	48.848			chr1	217904628	217907365	PRonly-chr1-85273	8.819
chr11	61219253	61220212	PR-chr11-21333	48.84			chr14	65606639	65607430	PRonly-chr14-19430	8.813
chr17	59269510	59270633	PR-chr17-23681	48.775			chr11	24761848	24762338	PRonly-chr11-10510	8.795
chr17	77702542	77704659	PR-chr17-34546	48.621			chr2	222978409	222979098	PRonly-chr2-95374	8.783
chr4	17311528	17312192	PR-chr4-7238	48.606			chr1	154852803	154853366	PRonly-chr1-48692	8.782
chr10	73677977	73679039	PR-chr10-28061	48.53			chrX	17681151	17681750	PRonly-chrX-7199	8.782
chr1	212810827	212814415	PR-chr1-77254	48.445			chr5	172499093	172500990	PRonly-chr5-73221	8.764
chr20	38710071	38711002	PR-chr20-13832	48.33			chr1	208706190	208707262	PRonly-chr1-79484	8.716
chrX	66681337	66683939	PR-chrX-20483	48.33			chr5	143248171	143248683	PRonly-chr5-59481	8.708
chr9	74170238	74171228	PR-chr9-17707	48.224			chr1	159966606	159967164	PRonly-chr1-51337	8.686
chr10	3504238	3505464	PR-chr10-1691	48.174			chr22	29983778	29984274	PRonly-chr22-7824	8.686
chr6	120045859	120047386	PR-chr6-40786	47.969			chr22	44966553	44967233	PRonly-chr22-13922	8.663
chr16	57318613	57319487	PR-chr16-20092	47.938			chr12	10551649	10552169	PRonly-chr12-6095	8.645
chr1	85772400	85773492	PR-chr1-28219	47.9			chr7	13650487	13651585	PRonly-chr7-7593	8.633
chr20	57820431	57821521	PR-chr20-24145	47.885			chr14	59715854	59716366	PRonly-chr14-16818	8.621
chr18	18048500	18049192	PR-chr18-7559	47.834			chr1	198287658	198289967	PRonly-chr1-72619	8.613
chr14	92180186	92181718	PR-chr14-30184	47.812			chr1	242747943	242748463	PRonly-chr1-100373	8.61
chr2	100050557	100051522	PR-chr2-38946	47.126			chr1	222321501	222323566	PRonly-chr1-87940	8.609
chr5	81086715	81088141	PR-chr5-30048	46.937			chr1	167039048	167040600	PRonly-chr1-55348	8.606
chr3	66548787	66549472	PR-chr3-26185	46.894			chr1	231731044	231732131	PRonly-chr1-93701	8.592
chr20	48979167	48980045	PR-chr20-19321	46.846			chr8	76379362	76379996	PRonly-chr8-33718	8.588
chr14	103272045	103273632	PR-chr14-36165	46.814			chr9	124722962	124723514	PRonly-chr9-41170	8.574
chr22	28062659	28063431	PR-chr22-6296	46.781			chr7	35783359	35784924	PRonly-chr7-20981	8.567
chr8	42437204	42438015	PR-chr8-18269	46.745			chr4	143374500	143375045	PRonly-chr4-56537	8.564
chr8	29202325	29202963	PR-chr8-12049	46.693			chr1	214253889	214255653	PRonly-chr1-82930	8.558
chr7	21610989	21611619	PR-chr7-11725	46.656			chr1	153069531	153070353	PRonly-chr1-47611	8.552
chr2	223802628	223803719	PR-chr2-88030	46.529			chr2	196446024	196447515	PRonly-chr2-83021	8.532
chr2	16693792	16696964	PR-chr2-7430	46.496			chr11	40593433	40593984	PRonly-chr11-17361	8.529
chr16	88316475	88317370	PR-chr16-34165	46.439			chr4	31549665	31550470	PRonly-chr4-13826	8.529
chr15	58453586	58454640	PR-chr15-16301	46.318			chr20	30256652	30257420	PRonly-chr20-10358	8.523
chr12	119011805	119013159	PR-chr12-52531	46.211			chr1	180550839	180551634	PRonly-chr1-62973	8.509
chr9	37594851	37595577	PR-chr9-14886	46.208			chr11	29529250	29531009	PRonly-chr11-12480	8.49
chr14	68086643	68087375	PR-chr14-18815	46.181			chr12	23159706	23160777	PRonly-chr12-13046	8.47
chr12	46703132	46704311	PR-chr12-22196	45.981			chr12	67013359	67014668	PRonly-chr12-33341	8.45
chr10	8802905	8804007	PR-chr10-4168	45.964			chr8	87382513	87383523	PRonly-chr8-38788	8.433
chr9	88209756	88211774	PR-chr9-23207	45.925			chr18	46507546	46508016	PRonly-chr18-23686	8.413
chr18	54785884	54786533	PR-chr18-26160	45.915			chr7	21469281	21470098	PRonly-chr7-12251	8.41
chr3	157802966	157804863	PR-chr3-59657	45.903			chr18	8231729	8232081	PRonly-chr18-4085	8.391
chr17	44835075	44836650	PR-chr17-16196	45.85			chr1	239641310	239641925	PRonly-chr1-98569	8.378
chr2	242688795	242689418	PR-chr2-96388	45.799			chr1	222949783	222950396	PRonly-chr1-88310	8.354
chr12	115348316	115348911	PR-chr12-51034	45.755			chr8	30343699	30344370	PRonly-chr8-13482	8.346
chr2	38176554	38177500	PR-chr2-16436	45.728			chr1	221215642	221216969	PRonly-chr1-87325	8.342
chr2	133978777	133979417	PR-chr2-51341	45.712			chr15	23639464	23640051	PRonly-chr15-1653	8.325
chr11	27860328	27861060	PR-chr11-10874	45.409			chr13	109444837	109445767	PRonly-chr13-38514	8.303
chr8	75651158	75651805	PR-chr8-31225	45.278			chr1	214797679	214798245	PRonly-chr1-83262	8.277
chr14	49535404	49538751	PR-chr14-11223	45.262			chr3	60271077	60271663	PRonly-chr3-26123	8.277
chr1	221972437	221974659	PR-chr1-82982	45.097			chr1	200777355	200778893	PRonly-chr1-74337	8.272
chr12	6285573	6286435	PR-chr12-3947	44.921			chr12	14687430	14688144	PRonly-chr12-8415	8.265
chr1	233199396	233200738	PR-chr1-89696	44.88			chr6	57582420	57584151	PRonly-chr6-24874	8.263
chr17	68988296	68989320	PR-chr17-29229	44.8			chr7	6145098	6145832	PRonly-chr7-3498	8.262
chr18	3048192	3048875	PR-chr18-1304	44.68			chr8	105179539	105180992	PRonly-chr8-47627	8.26
chr9	90620333	90621940	PR-chr9-24217	44.612			chr12	118556715	118557286	PRonly-chr12-55974	8.235
chr3	178819526	178820319	PR-chr3-67604	44.14			chr1	214001911	214003070	PRonly-chr1-82761	8.216
chr2	101062737	101063802	PR-chr2-39391	44.013			chr12	14868716	14869704	PRonly-chr12-8523	8.192
chr1	205143465	205144110	PR-chr1-72483	43.941			chr1	223044117	223044904	PRonly-chr1-88380	8.169
chr2	204682563	204683656	PR-chr2-79591	43.848			chr1	178302435	178303024	PRonly-chr1-61584	8.162
chr5	32821316	32822063	PR-chr5-12934	43.841			chr12	13824131	13825450	PRonly-chr12-7946	8.151
chr11	2965463	2967789	PR-chr11-1021	43.777			chr12	37185866	37187192	PRonly-chr12-19351	8.135
chr3	157874296	157875152	PR-chr3-59678	43.739			chr1	165506876	165507863	PRonly-chr1-54430	8.135
chr5	148960513	148961185	PR-chr5-56991	43.737			chr18	25349591	25350139	PRonly-chr18-12148	8.133
chr1	150778767	150779941	PR-chr1-43023	43.735			chr7	13156341	13156941	PRonly-chr7-7327	8.115
chr8	91082891	91083496	PR-chr8-37679	43.637			chr15	60014538	60015574	PRonly-chr15-18943	8.097
chr5	983503	984267	PR-chr5-398	43.503			chr17	49157339	49157845	PRonly-chr17-19560	8.085
chr1	8241383	8242370	PR-chr1-3098	43.496			chr17	56088545	56090514	PRonly-chr17-23372	8.084
chr2	28345387	28346445	PR-chr2-12459	43.206			chr8	121544049	121544759	PRonly-chr8-55896	8.082
chr12	120670623	120671569	PR-chr12-53188	43.083			chr16	25754718	25755233	PRonly-chr16-12393	8.08
chr3	13491909	13493119	PR-chr3-5590	42.979			chr8	82108393	82109028	PRonly-chr8-36485	8.075
chr10	111726877	111727529	PR-chr10-44878	42.912			chr5	138966411	138967418	PRonly-chr5-57419	8.055
chr9	99948314	99949316	PR-chr9-27994	42.893			chr5	76390052	76390738	PRonly-chr5-30989	8.048
chr2	26350572	26351176	PR-chr2-11553	42.889			chr1	216944685	216947925	PRonly-chr1-84708	8.047
chr5	55389661	55390353	PR-chr5-20153	42.825			chr1	143771888	143773251	PRonly-chr1-43393	8.035
chr2	65390875	65391713	PR-chr2-27601	42.784			chr12	22534938	22535532	PRonly-chr12-12706	8.032
chr17	68096307	68097135	PR-chr17-28678	42.772			chr1	231255789	231256596	PRonly-chr1-93400	8.02
chr2	11563502	11564720	PR-chr2-5340	42.668			chr1	220649923	220650408	PRonly-chr1-86969	8.018
chr5	159095084	159095881	PR-chr5-61422	42.629			chr9	112900748	112901335	PRonly-chr9-35779	8.008
chr3	32053258	32053965	PR-chr3-12889	42.56			chr1	215561844	215562686	PRonly-chr1-83806	8.006
chr8	37574793	37576482	PR-chr8-15993	42.46			chr15	81872863	81873457	PRonly-chr15-29962	8.001
chr1	206089026	206089832	PR-chr1-73029	42.448			chr10	52578835	52579365	PRonly-chr10-20779	8
chr16	1890099	1890810	PR-chr16-1195	42.296			chr10	78491895	78492969	PRonly-chr10-32771	8
chr10	35823790	35825183	PR-chr10-15065	42.231			chr10	85343435	85344025	PRonly-chr10-35925	8
chr6	88498002	88498688	PR-chr6-30878	42.211			chr10	90483014	90483584	PRonly-chr10-38241	8
chr7	73075171	73076383	PR-chr7-33494	42.039			chr10	126080594	126081198	PRonly-chr10-56757	8
chr16	64463751	64464922	PR-chr16-22955	42			chr10	129201622	129202903	PRonly-chr10-58553	8
chr17	53361777	53362417	PR-chr17-20806	42			chr11	4688276	4689225	PRonly-chr11-1693	8
chr18	69510496	69511111	PR-chr18-33081	42			chr11	27157389	27157931	PRonly-chr11-11454	8
chr16	1882787	1883436	PR-chr16-1191	41.985			chr11	85702461	85703038	PRonly-chr11-33308	8
chr10	120369613	120371575	PR-chr10-49271	41.947			chr12	2108342	2108891	PRonly-chr12-1338	8
chr5	173126945	173128103	PR-chr5-67850	41.939			chr12	9035617	9036217	PRonly-chr12-5419	8
chr15	36296269	36297359	PR-chr15-6388	41.93			chr12	9311945	9312518	PRonly-chr12-5575	8
chr11	79183367	79184290	PR-chr11-28903	41.873			chr12	15720305	15721197	PRonly-chr12-9058	8
chr6	149442725	149443729	PR-chr6-49903	41.686			chr12	15883551	15884225	PRonly-chr12-9170	8
chr1	207608778	207611122	PR-chr1-74065	41.636			chr12	24329486	24330034	PRonly-chr12-13774	8
chr14	91140384	91141295	PR-chr14-29693	41.542			chr12	28654796	28655180	PRonly-chr12-16345	8
chr19	60827647	60828635	PR-chr19-18807	41.538			chr12	32741454	32742120	PRonly-chr12-18342	8
chr2	95046347	95047159	PR-chr2-37108	41.486			chr12	36964407	36965094	PRonly-chr12-19233	8
chr20	48893105	48893843	PR-chr20-19268	41.151			chr12	59878564	59879007	PRonly-chr12-29475	8
chr16	71581394	71582102	PR-chr16-26374	41.094			chr12	62644117	62645077	PRonly-chr12-30739	8
chr1	233077852	233079261	PR-chr1-89610	41.042			chr12	70994559	70995151	PRonly-chr12-35682	8
chr1	200948268	200949609	PR-chr1-69849	41.037			chr12	78354288	78355358	PRonly-chr12-38869	8
chr12	7838111	7839328	PR-chr12-4722	41.013			chr12	90300279	90300950	PRonly-chr12-43558	8
chr18	72498054	72499226	PR-chr18-34864	40.969			chr13	33055141	33055967	PRonly-chr13-5905	8
chr12	37727265	37728435	PR-chr12-18550	40.919			chr13	49932388	49932780	PRonly-chr13-13291	8
chr8	134437442	134438248	PR-chr8-58270	40.915			chr13	60879922	60880487	PRonly-chr13-17727	8
chr20	46747650	46749594	PR-chr20-18127	40.887			chr13	74905020	74905585	PRonly-chr13-23526	8
chr9	94946254	94946920	PR-chr9-26026	40.806			chr13	76319097	76319670	PRonly-chr13-24165	8
chr7	2198989	2200300	PR-chr7-1240	40.636			chr13	80331252	80331608	PRonly-chr13-25888	8
chr14	49463050	49463726	PR-chr14-11185	40.601			chr13	80896148	80896704	PRonly-chr13-26072	8
chr17	76897446	76898100	PR-chr17-34038	40.584			chr13	98294732	98295252	PRonly-chr13-33098	8
chr8	48600926	48602014	PR-chr8-18984	40.53			chr14	31751544	31752140	PRonly-chr14-5305	8
chr1	234728586	234729493	PR-chr1-90634	40.443			chr14	33529754	33531016	PRonly-chr14-6312	8
chrX	9979836	9981022	PR-chrX-3277	40.441			chr14	71391016	71391580	PRonly-chr14-22037	8
chr2	234942143	234942882	PR-chr2-92709	40.421			chr14	86323366	86323973	PRonly-chr14-29549	8
chr5	138511835	138512769	PR-chr5-52467	40.367			chr15	19174277	19175059	PRonly-chr15-222	8
chr12	41439426	41440462	PR-chr12-20179	40.115			chr15	49904767	49905252	PRonly-chr15-13804	8
chr19	52704956	52706257	PR-chr19-15854	40.076			chr15	62437305	62437880	PRonly-chr15-20340	8
chr4	13975596	13976180	PR-chr4-5847	40			chr15	62751982	62752743	PRonly-chr15-20490	8
chr16	8946490	8947184	PR-chr16-4907	39.93			chr15	77281552	77282063	PRonly-chr15-27947	8
chr12	111772151	111773033	PR-chr12-49464	39.908			chr15	77546905	77547564	PRonly-chr15-28077	8
chr11	19890290	19891298	PR-chr11-7956	39.884			chr15	77729625	77730223	PRonly-chr15-28168	8
chr1	8172455	8173075	PR-chr1-3079	39.799			chr15	91334739	91335723	PRonly-chr15-34704	8
chr9	129113448	129114056	PR-chr9-40164	39.774			chr16	33067780	33068365	PRonly-chr16-15068	8
chr8	81882354	81883534	PR-chr8-33976	39.718			chr16	58541038	58541906	PRonly-chr16-21657	8
chr14	72036442	72037550	PR-chr14-20585	39.717			chr16	58918563	58919416	PRonly-chr16-21785	8
chr7	28042612	28043528	PR-chr7-15573	39.692			chr16	61520706	61521223	PRonly-chr16-22932	8
chr5	142112850	142113824	PR-chr5-54057	39.64			chr16	69138282	69140188	PRonly-chr16-26711	8
chr1	28636899	28637638	PR-chr1-10347	39.452			chr16	69636111	69638866	PRonly-chr16-27012	8
chr12	1029354	1030008	PR-chr12-552	39.302			chr17	48115728	48116197	PRonly-chr17-19046	8
chr1	11552107	11552770	PR-chr1-4259	39.245			chr17	56999964	57001362	PRonly-chr17-23876	8
chr12	121938569	121939405	PR-chr12-53621	39.237			chr17	58668737	58669225	PRonly-chr17-24649	8
chr21	43760625	43761745	PR-chr21-9553	39.054			chr17	61606966	61607502	PRonly-chr17-26325	8
chr8	98165723	98166396	PR-chr8-41124	39.021			chr17	64164443	64165645	PRonly-chr17-27774	8
chr2	242693838	242694518	PR-chr2-96391	38.999			chr17	65546904	65547667	PRonly-chr17-28550	8
chr19	44081789	44082374	PR-chr19-12565	38.996			chr17	67198863	67200488	PRonly-chr17-29616	8
chr5	133874341	133875658	PR-chr5-50384	38.941			chr18	22410137	22410700	PRonly-chr18-10615	8
chr9	4856154	4856999	PR-chr9-2055	38.921			chr18	30573354	30573898	PRonly-chr18-14736	8
chr1	161178661	161179808	PR-chr1-48438	38.856			chr18	40673401	40674787	PRonly-chr18-20238	8
chr2	233870301	233870915	PR-chr2-92241	38.789			chr18	41876041	41876605	PRonly-chr18-21008	8
chr10	65111870	65112820	PR-chr10-24358	38.735			chr18	43290301	43290852	PRonly-chr18-21818	8
chr2	158431831	158432585	PR-chr2-61183	38.679			chr18	60344821	60345825	PRonly-chr18-31392	8
chr2	217124007	217124588	PR-chr2-84907	38.647			chr18	62698750	62700095	PRonly-chr18-32580	8
chr5	163877264	163878245	PR-chr5-63400	38.644			chr18	66452924	66453417	PRonly-chr18-34512	8
chr10	3920016	3920694	PR-chr10-1908	38.57			chr19	7208360	7208931	PRonly-chr19-2708	8
chr13	48569499	48570736	PR-chr13-11808	38.562			chr19	12468844	12469325	PRonly-chr19-4389	8
chrX	16754223	16754872	PR-chrX-6234	38.525			chr19	41901316	41901958	PRonly-chr19-12396	8
chr8	126151003	126151680	PR-chr8-54202	38.475			chr19	61000402	61000933	PRonly-chr19-19612	8
chr14	69067800	69068604	PR-chr14-19332	38.266			chr19	61677835	61678432	PRonly-chr19-19893	8
chr4	40359842	40360446	PR-chr4-15964	38.217			chr1	83297499	83298996	PRonly-chr1-29425	8
chr3	141483197	141484005	PR-chr3-53312	38.177			chr1	93586868	93587888	PRonly-chr1-32718	8
chr8	116942570	116944253	PR-chr8-49610	38.008			chr1	115658329	115658892	PRonly-chr1-40106	8
chr17	73189430	73190118	PR-chr17-31762	38			chr1	117541778	117542365	PRonly-chr1-41258	8
chr10	21621845	21622840	PR-chr10-9429	37.915			chr1	118675035	118675516	PRonly-chr1-41855	8
chr4	75460229	75460949	PR-chr4-26773	37.893			chr1	141895682	141896399	PRonly-chr1-42996	8
chr8	59952412	59953127	PR-chr8-23902	37.854			chr1	149748050	149748583	PRonly-chr1-45694	8
chr2	43356961	43357829	PR-chr2-18662	37.848			chr1	167247782	167248504	PRonly-chr1-55466	8
chr2	160787082	160788081	PR-chr2-62170	37.806			chr1	176557997	176558767	PRonly-chr1-60565	8
chr1	244847599	244849198	PR-chr1-96242	37.765			chr1	180165933	180167478	PRonly-chr1-62741	8
chr10	78927758	78928921	PR-chr10-30537	37.763			chr1	180251912	180252495	PRonly-chr1-62778	8
chr3	27376362	27377542	PR-chr3-11072	37.72			chr1	181322873	181323810	PRonly-chr1-63461	8
chr13	99403096	99404683	PR-chr13-31171	37.712			chr1	187421532	187421904	PRonly-chr1-67095	8
chr20	36457039	36457757	PR-chr20-12604	37.637			chr1	191937270	191938057	PRonly-chr1-69457	8
chr4	3105515	3106294	PR-chr4-1339	37.624			chr1	195367840	195368404	PRonly-chr1-70902	8
chr14	83496941	83498478	PR-chr14-25889	37.612			chr1	203259360	203260034	PRonly-chr1-76056	8
chr15	23533300	23533994	PR-chr15-1428	37.567			chr1	205673188	205675711	PRonly-chr1-77539	8
chr15	68820306	68821066	PR-chr15-21644	37.558			chr1	209985188	209986435	PRonly-chr1-80250	8
chr7	3112309	3113099	PR-chr7-1752	37.558			chr1	211849805	211851368	PRonly-chr1-81384	8
chr14	80141606	80143048	PR-chr14-24338	37.521			chr1	213007382	213007944	PRonly-chr1-82186	8
chr9	33397960	33398575	PR-chr9-13186	37.483			chr1	215694642	215695600	PRonly-chr1-83886	8
chr8	116860539	116861643	PR-chr8-49582	37.364			chr1	216407498	216408498	PRonly-chr1-84321	8
chr9	79568133	79568870	PR-chr9-19811	37.347			chr1	216443005	216443978	PRonly-chr1-84350	8
chr14	95701931	95702841	PR-chr14-32049	37.321			chr1	217155586	217156382	PRonly-chr1-84838	8
chr1	8394815	8395790	PR-chr1-3148	37.249			chr1	218853462	218854134	PRonly-chr1-85901	8
chr11	130070552	130071327	PR-chr11-46871	37.23			chr1	219752498	219753216	PRonly-chr1-86430	8
chr1	178362757	178364285	PR-chr1-57571	37.09			chr1	220087067	220088396	PRonly-chr1-86641	8
chr11	111696131	111697047	PR-chr11-39525	37.052			chr1	223543726	223544690	PRonly-chr1-88573	8
chr13	31856720	31857720	PR-chr13-4980	37.022			chr1	223652630	223653142	PRonly-chr1-88627	8
chr5	172845722	172846443	PR-chr5-67684	37.013			chr1	228089725	228090390	PRonly-chr1-91319	8
chr8	75035207	75035879	PR-chr8-30941	37			chr1	232096358	232097979	PRonly-chr1-93899	8
chr1	180453565	180454161	PR-chr1-58806	36.963			chr1	237665199	237666177	PRonly-chr1-97271	8
chr7	80622852	80624067	PR-chr7-35760	36.893			chr1	239217077	239217556	PRonly-chr1-98264	8
chr18	66954544	66955220	PR-chr18-31954	36.887			chr1	240002700	240003567	PRonly-chr1-98798	8
chr22	16500538	16501418	PR-chr22-586	36.798			chr20	28246057	28247156	PRonly-chr20-9904	8
chr9	139626102	139626992	PR-chr9-45028	36.794			chr20	46125138	46125504	PRonly-chr20-18820	8
chr20	51395977	51396690	PR-chr20-20632	36.78			chr21	40554112	40554831	PRonly-chr21-9217	8
chr10	72671058	72671863	PR-chr10-27493	36.75			chr22	30516054	30516757	PRonly-chr22-8094	8
chr13	108693433	108694976	PR-chr13-35302	36.748			chr2	10610429	10610934	PRonly-chr2-5231	8
chr14	34942595	34943923	PR-chr14-6293	36.679			chr2	12498160	12498908	PRonly-chr2-6145	8
chr20	295807	296410	PR-chr20-72	36.671			chr2	60138184	60138769	PRonly-chr2-27786	8
chr14	67994529	67996748	PR-chr14-18759	36.441			chr2	65759073	65759568	PRonly-chr2-30115	8
chr18	22775348	22776056	PR-chr18-9958	36.334			chr2	66623453	66624298	PRonly-chr2-30549	8
chr13	23674230	23674867	PR-chr13-1620	36.19			chr2	66764900	66765591	PRonly-chr2-30610	8
chr12	11929851	11930808	PR-chr12-6632	36.173			chr2	81901020	81901568	PRonly-chr2-37099	8
chr1	230995503	230998083	PR-chr1-88318	36.056			chr2	99937756	99938259	PRonly-chr2-42155	8
chr1	189811181	189812289	PR-chr1-63943	36.041			chr2	104321425	104321960	PRonly-chr2-44107	8
chr1	180379673	180381128	PR-chr1-58749	35.998			chr2	112432325	112433101	PRonly-chr2-46956	8
chr15	99079331	99079971	PR-chr15-35539	35.948			chr2	136114600	136115180	PRonly-chr2-56561	8
chr1	227476075	227476668	PR-chr1-86080	35.923			chr2	144963660	144964201	PRonly-chr2-60663	8
chr13	51146319	51147183	PR-chr13-12858	35.771			chr2	145610420	145610930	PRonly-chr2-61022	8
chr17	53363755	53364464	PR-chr17-20808	35.769			chr2	147228047	147228582	PRonly-chr2-61720	8
chr11	129804468	129805588	PR-chr11-46740	35.748			chr2	164907836	164908317	PRonly-chr2-69455	8
chr14	99011144	99011785	PR-chr14-33932	35.748			chr2	170562789	170563528	PRonly-chr2-71992	8
chr9	27529541	27530168	PR-chr9-10973	35.747			chr2	175453268	175453815	PRonly-chr2-74222	8
chr7	42298554	42299751	PR-chr7-24067	35.655			chr2	219524459	219525150	PRonly-chr2-93630	8
chr7	157262500	157263319	PR-chr7-65988	35.576			chr3	2082744	2083688	PRonly-chr3-884	8
chr12	14956878	14958621	PR-chr12-8231	35.51			chr3	45566945	45567459	PRonly-chr3-19538	8
chr2	11581444	11582517	PR-chr2-5350	35.497			chr3	64518776	64519958	PRonly-chr3-28102	8
chr1	201446656	201447267	PR-chr1-70207	35.456			chr3	74115096	74115794	PRonly-chr3-32355	8
chr4	170237641	170238500	PR-chr4-62041	35.446			chr3	102038359	102038847	PRonly-chr3-41792	8
chr16	87991442	87992562	PR-chr16-34004	35.398			chr3	103702333	103703397	PRonly-chr3-42447	8
chr5	167712605	167713296	PR-chr5-65225	35.357			chr3	106616888	106617335	PRonly-chr3-43501	8
chr9	131292646	131293560	PR-chr9-41121	35.281			chr3	123130862	123131429	PRonly-chr3-50639	8
chr18	44136990	44138029	PR-chr18-20553	35.228			chr3	125896371	125896852	PRonly-chr3-52024	8
chr7	12947592	12948522	PR-chr7-6840	35.159			chr3	159627189	159627715	PRonly-chr3-66556	8
chr21	43558868	43559975	PR-chr21-9462	35			chr3	175138012	175138541	PRonly-chr3-72957	8
chr1	150982172	150983247	PR-chr1-43133	34.978			chr4	19256783	19257425	PRonly-chr4-8434	8
chr18	30812977	30813856	PR-chr18-13613	34.964			chr4	39473341	39473646	PRonly-chr4-16970	8
chr12	46556419	46558954	PR-chr12-22107	34.956			chr4	46167377	46167968	PRonly-chr4-19555	8
chr9	129896487	129897666	PR-chr9-40517	34.892			chr4	62460962	62461537	PRonly-chr4-24728	8
chr20	42529181	42529941	PR-chr20-15907	34.867			chr4	71215871	71217553	PRonly-chr4-27535	8
chr3	189459328	189460546	PR-chr3-72011	34.844			chr4	109769813	109770391	PRonly-chr4-43236	8
chr5	59121796	59123333	PR-chr5-21788	34.819			chr4	137299370	137300265	PRonly-chr4-53916	8
chr7	133188836	133189460	PR-chr7-56423	34.796			chr4	141373328	141373701	PRonly-chr4-55704	8
chr14	105528719	105529382	PR-chr14-37349	34.788			chr4	142240571	142241358	PRonly-chr4-56112	8
chr20	24968044	24969155	PR-chr20-8814	34.752			chr5	6333953	6334333	PRonly-chr5-3289	8
chr1	202522253	202523333	PR-chr1-70864	34.735			chr5	51816907	51817392	PRonly-chr5-20716	8
chrX	17098211	17098898	PR-chrX-6395	34.717			chr5	72376237	72376754	PRonly-chr5-29124	8
chr7	30170840	30173240	PR-chr7-16954	34.708			chr5	78009573	78009897	PRonly-chr5-31742	8
chr5	100010934	100012041	PR-chr5-37447	34.669			chr5	153156349	153157408	PRonly-chr5-63958	8
chr19	1114965	1115645	PR-chr19-400	34.666			chr6	580388	581732	PRonly-chr6-250	8
chr7	50620250	50621218	PR-chr7-27615	34.636			chr6	17217242	17217776	PRonly-chr6-7719	8
chr15	83674747	83675944	PR-chr15-28021	34.609			chr6	38556181	38556755	PRonly-chr6-16502	8
chr3	196767761	196769241	PR-chr3-75197	34.588			chr6	38670039	38670578	PRonly-chr6-16553	8
chr8	112195106	112196101	PR-chr8-47605	34.533			chr6	53562560	53563125	PRonly-chr6-23129	8
chr8	96182030	96182896	PR-chr8-40109	34.529			chr6	73033933	73035245	PRonly-chr6-29007	8
chr5	117894518	117895543	PR-chr5-44232	34.464			chr6	76103456	76104008	PRonly-chr6-30151	8
chr7	134596409	134597262	PR-chr7-57037	34.291			chr6	139660797	139661178	PRonly-chr6-52370	8
chr14	79917868	79918709	PR-chr14-24223	34.193			chr6	141531933	141532580	PRonly-chr6-52950	8
chr8	37397788	37398890	PR-chr8-15885	34.117			chr6	168089165	168090040	PRonly-chr6-62414	8
chr5	132873823	132875025	PR-chr5-49944	34.02			chr7	3416862	3418379	PRonly-chr7-1985	8
chr8	86946021	86948055	PR-chr8-36025	34			chr7	3967556	3968170	PRonly-chr7-2338	8
chr9	116420925	116421855	PR-chr9-34627	34			chr7	18077092	18078105	PRonly-chr7-10199	8
chr8	129238583	129239219	PR-chr8-55694	33.991			chr7	23638702	23639265	PRonly-chr7-13511	8
chr2	237561992	237562609	PR-chr2-93998	33.946			chr7	28733239	28733931	PRonly-chr7-16776	8
chr19	50314476	50315238	PR-chr19-14923	33.941			chr7	31922948	31923451	PRonly-chr7-18783	8
chr12	14948985	14949815	PR-chr12-8226	33.93			chr7	37329007	37330584	PRonly-chr7-21940	8
chr6	109014641	109017744	PR-chr6-37955	33.916			chr7	39019657	39020183	PRonly-chr7-22985	8
chr18	20922688	20924323	PR-chr18-9042	33.891			chr7	41148793	41150578	PRonly-chr7-24263	8
chr3	15303950	15304899	PR-chr3-6392	33.841			chr7	42040547	42041063	PRonly-chr7-24857	8
chr8	131066819	131067435	PR-chr8-56559	33.808			chr7	42703037	42704226	PRonly-chr7-25265	8
chr14	99639337	99640968	PR-chr14-34299	33.736			chr7	76624743	76625226	PRonly-chr7-35941	8
chr14	66978667	66979508	PR-chr14-18289	33.703			chr7	107678905	107679823	PRonly-chr7-49187	8
chr1	116655717	116656778	PR-chr1-37788	33.62			chr7	122231674	122232441	PRonly-chr7-55440	8
chr8	117664400	117665554	PR-chr8-50010	33.616			chr7	142590297	142590855	PRonly-chr7-64554	8
chr5	17265990	17266698	PR-chr5-7763	33.549			chr8	13441887	13442226	PRonly-chr8-5682	8
chr22	30305668	30306303	PR-chr22-7462	33.516			chr8	41951840	41953467	PRonly-chr8-19233	8
chr9	97918085	97919488	PR-chr9-27244	33.453			chr8	56957470	56957998	PRonly-chr8-24140	8
chr1	22671530	22672167	PR-chr1-8215	33.447			chr8	68341435	68342217	PRonly-chr8-29736	8
chr11	1774195	1774991	PR-chr11-442	33.398			chr8	70261381	70262074	PRonly-chr8-30671	8
chr17	44827046	44827845	PR-chr17-16191	33.377			chr8	70652672	70653464	PRonly-chr8-30912	8
chr5	31860959	31861852	PR-chr5-12545	33.26			chr8	79481948	79482456	PRonly-chr8-35194	8
chr9	124050398	124051262	PR-chr9-37964	33.183			chr8	91995863	91996515	PRonly-chr8-40851	8
chr9	15200932	15201889	PR-chr9-6160	33.162			chr8	102775036	102775840	PRonly-chr8-46407	8
chr2	157171481	157172378	PR-chr2-60689	33.139			chr8	107240351	107240964	PRonly-chr8-48690	8
chr10	29268535	29269213	PR-chr10-12383	33.062			chr8	122402728	122403620	PRonly-chr8-56369	8
chr18	53896969	53897914	PR-chr18-25616	33			chr8	126913714	126914058	PRonly-chr8-58792	8
chr19	2706498	2707173	PR-chr19-1067	33			chr9	10372181	10373378	PRonly-chr9-4562	8
chr1	93856136	93856742	PR-chr1-30564	32.999			chr9	128241196	128241844	PRonly-chr9-42814	8
chr8	85679242	85680026	PR-chr8-35578	32.989			chrX	19446344	19447096	PRonly-chrX-7935	8
chr2	189146240	189146773	PR-chr2-73582	32.938			chrX	23268158	23269201	PRonly-chrX-9514	8
chr8	69928796	69929719	PR-chr8-28546	32.935			chrX	27902460	27902953	PRonly-chrX-11203	8
chr8	125862321	125863388	PR-chr8-54063	32.897			chrX	35245888	35246375	PRonly-chrX-14236	8
chr9	84937453	84938189	PR-chr9-21952	32.891			chrX	53088522	53089012	PRonly-chrX-20174	8
chr1	186883144	186885433	PR-chr1-62590	32.876			chrX	119310820	119311844	PRonly-chrX-37106	8
chr2	103771360	103773040	PR-chr2-40514	32.848			chrX	126418779	126419824	PRonly-chrX-39295	8
chr5	157824920	157825855	PR-chr5-60776	32.834
chr16	79732273	79732892	PR-chr16-29969	32.828
chr21	36907152	36907737	PR-chr21-7081	32.806
chr1	117736908	117738066	PR-chr1-38488	32.788
chr2	67527137	67528405	PR-chr2-28605	32.735
chr20	20476923	20477766	PR-chr20-7039	32.707
chr12	25629273	25629943	PR-chr12-13729	32.643
chr8	129398462	129399183	PR-chr8-55799	32.518
chr1	185862195	185862794	PR-chr1-62052	32.491
chr7	7568308	7569396	PR-chr7-4003	32.481
chr12	20032321	20032934	PR-chr12-10947	32
chr8	102477915	102478547	PR-chr8-43084	31.965
chr18	72527626	72528804	PR-chr18-34883	31.953
chr11	69757187	69758365	PR-chr11-25265	31.936
chr1	114654715	114655464	PR-chr1-36943	31.922
chr1	150657247	150658898	PR-chr1-42960	31.84
chr3	76697329	76698316	PR-chr3-30203	31.84
chr1	175824815	175825790	PR-chr1-56133	31.833
chr18	8288874	8289499	PR-chr18-3858	31.819
chr5	71193724	71194875	PR-chr5-25857	31.758
chrX	64974590	64975916	PR-chrX-20134	31.75
chr3	192007970	192008743	PR-chr3-73159	31.744
chr6	41540939	41542065	PR-chr6-16268	31.739
chr2	211754666	211755297	PR-chr2-82534	31.625
chr16	79428192	79429078	PR-chr16-29861	31.604
chr1	47044791	47045408	PR-chr1-16590	31.551
chr5	134536934	134538168	PR-chr5-50678	31.539
chr7	118899545	118900274	PR-chr7-50645	31.377
chr2	65380703	65381395	PR-chr2-27595	31.293
chr10	62331594	62333289	PR-chr10-23041	31.256
chr13	51378623	51379239	PR-chr13-12970	31.228
chr9	138055612	138056727	PR-chr9-44237	31.203
chr5	32308408	32309128	PR-chr5-12746	31.194
chr5	38702575	38703328	PR-chr5-15189	31.063
chr1	201504597	201505310	PR-chr1-70235	31.041
chr15	23655506	23657135	PR-chr15-1482	31.031
chr16	66051756	66054135	PR-chr16-23764	31.009
chr1	173374126	173374704	PR-chr1-54652	30.996
chr16	65108021	65108699	PR-chr16-23277	30.973
chr1	150286467	150287846	PR-chr1-42772	30.954
chr22	45218011	45219119	PR-chr22-13254	30.913
chr11	48019974	48021048	PR-chr11-18939	30.893
chr4	77666109	77667135	PR-chr4-27578	30.879
chr2	20501664	20502341	PR-chr2-9130	30.86
chr15	65994135	65994805	PR-chr15-20239	30.829
chr12	10707600	10708310	PR-chr12-5979	30.807
chr12	79270853	79271660	PR-chr12-36941	30.754
chr12	118400966	118402168	PR-chr12-52294	30.65
chr17	76348898	76350781	PR-chr17-33658	30.643
chr7	156803559	156804219	PR-chr7-65725	30.615
chr9	109343486	109344054	PR-chr9-31555	30.589
chr13	44326359	44327341	PR-chr13-10192	30.584
chr7	127693935	127695013	PR-chr7-54013	30.578
chr5	44033287	44034263	PR-chr5-17212	30.573
chr15	68455176	68455813	PR-chr15-21451	30.563
chr7	95017056	95018140	PR-chr7-41377	30.552
chr8	59954226	59955075	PR-chr8-23904	30.492
chr1	230188697	230190498	PR-chr1-87782	30.49
chr6	35676802	35678519	PR-chr6-13880	30.438
chr2	119811660	119812262	PR-chr2-46248	30.403
chr5	17369863	17370936	PR-chr5-7831	30.387
chr4	57952022	57952774	PR-chr4-21324	30.354
chr16	73644985	73647152	PR-chr16-27252	30.283
chr8	81152740	81154168	PR-chr8-33631	30.278
chr10	127966848	127967583	PR-chr10-53214	30.273
chr17	52240300	52241843	PR-chr17-20075	30.055
chr16	84311142	84311833	PR-chr16-32147	29.979
chr1	202652782	202653366	PR-chr1-70960	29.978
chr1	215155517	215156799	PR-chr1-78755	29.959
chr5	10354720	10355559	PR-chr5-4843	29.957
chr17	1831438	1832090	PR-chr17-591	29.902
chr10	115716088	115717285	PR-chr10-46992	29.804
chr10	120106073	120106792	PR-chr10-49130	29.801
chr2	217331271	217332169	PR-chr2-85012	29.801
chr16	30742502	30743459	PR-chr16-13629	29.797
chr13	109026319	109027212	PR-chr13-35431	29.782
chr7	37339017	37339774	PR-chr7-21077	29.756
chr16	66014864	66015750	PR-chr16-23731	29.722
chr7	148556461	148557325	PR-chr7-62478	29.652
chr5	10648770	10649497	PR-chr5-4981	29.631
chr1	221993546	221994827	PR-chr1-83001	29.594
chr2	231190585	231191718	PR-chr2-91099	29.53
chr8	103243791	103244659	PR-chr8-43488	29.443
chr19	17989049	17989893	PR-chr19-6059	29.429
chr10	6379256	6380334	PR-chr10-2967	29.42
chr22	41716744	41717344	PR-chr22-12053	29.378
chr5	133357020	133359330	PR-chr5-50193	29.269
chr17	45864484	45865360	PR-chr17-16835	29.225
chr17	75652130	75652983	PR-chr17-33233	29.087
chr15	75675819	75677085	PR-chr15-24683	29.072
chr5	58857427	58858654	PR-chr5-21645	29.048
chr2	114040526	114041172	PR-chr2-44065	29
chr12	115488104	115488907	PR-chr12-51096	28.997
chrX	49840698	49841866	PR-chrX-17984	28.987
chr13	42192537	42193102	PR-chr13-9218	28.981
chr10	4298406	4299040	PR-chr10-2102	28.957
chr3	14142362	14143509	PR-chr3-5848	28.954
chr5	135314297	135315264	PR-chr5-51053	28.946
chr1	8102871	8104194	PR-chr1-3052	28.875
chr1	175093271	175094470	PR-chr1-55673	28.844
chr10	115671594	115672255	PR-chr10-46968	28.785
chr12	26223683	26225784	PR-chr12-14081	28.762
chr14	68043100	68044508	PR-chr14-18790	28.742
chr1	35879494	35880159	PR-chr1-12783	28.72
chr15	86293385	86294705	PR-chr15-29275	28.683
chr10	78842979	78843955	PR-chr10-30487	28.68
chr16	70222158	70222800	PR-chr16-25802	28.654
chr1	116358935	116360301	PR-chr1-37618	28.644
chr13	50590684	50591729	PR-chr13-12609	28.565
chr4	151345569	151346158	PR-chr4-54815	28.473
chr7	36692564	36693214	PR-chr7-20654	28.467
chr9	73587393	73588472	PR-chr9-17487	28.41
chr4	188512695	188513420	PR-chr4-69378	28.393
chr12	55621652	55622377	PR-chr12-26063	28.3
chr16	52671430	52672746	PR-chr16-17989	28.256
chr6	47119911	47121585	PR-chr6-18610	28.251
chr5	75934321	75935220	PR-chr5-27925	28.22
chr3	140113663	140114398	PR-chr3-52686	28.198
chr3	66549670	66550417	PR-chr3-26186	28.192
chr4	141445272	141446487	PR-chr4-51053	28.156
chr10	60767053	60767630	PR-chr10-22240	28.093
chr22	29134533	29135353	PR-chr22-6881	28.022
chr15	37827544	37828144	PR-chr15-7175	28
chr1	230909468	230910076	PR-chr1-88272	28
chr17	5558083	5558916	PR-chr17-1780	27.996
chr6	64260294	64260831	PR-chr6-23225	27.969
chr17	27005810	27006557	PR-chr17-8702	27.948
chr1	209713875	209714992	PR-chr1-75312	27.943
chr1	167175419	167176328	PR-chr1-51618	27.927
chr12	50061176	50061790	PR-chr12-23485	27.926
chr18	72251835	72252592	PR-chr18-34699	27.913
chr12	17623203	17624397	PR-chr12-9740	27.894
chr15	66671818	66672452	PR-chr15-20535	27.892
chr5	42519503	42520270	PR-chr5-16654	27.89
chr18	22408996	22410345	PR-chr18-9740	27.878
chr3	171071916	171072579	PR-chr3-64455	27.877
chr5	103087408	103088422	PR-chr5-38499	27.87
chr19	45913036	45913713	PR-chr19-13234	27.85
chr16	83333087	83334504	PR-chr16-31646	27.828
chr18	64616012	64616768	PR-chr18-30880	27.823
chr13	75308132	75309761	PR-chr13-21874	27.8
chr2	169197430	169198024	PR-chr2-65636	27.785
chr14	30768441	30769226	PR-chr14-4651	27.77
chr19	18125758	18126305	PR-chr19-6111	27.77
chr6	138621840	138622504	PR-chr6-46582	27.747
chr16	14285674	14286640	PR-chr16-7484	27.74
chr11	74760833	74761712	PR-chr11-27322	27.739
chr20	57781716	57782880	PR-chr20-24126	27.73
chr3	196766627	196767357	PR-chr3-75196	27.699
chr10	121287026	121287998	PR-chr10-49718	27.673
chr12	7309183	7310014	PR-chr12-4540	27.626
chr19	2527050	2527629	PR-chr19-1014	27.624
chrX	118520537	118521308	PR-chrX-33654	27.621
chr6	12432083	12432955	PR-chr6-5009	27.617
chr17	198258	198844	PR-chr17-63	27.608
chr18	32495929	32497005	PR-chr18-14421	27.576
chr1	153171130	153172115	PR-chr1-44350	27.56
chr17	43387777	43388395	PR-chr17-15342	27.539
chr5	14061772	14062817	PR-chr5-6321	27.498
chr20	49075915	49076611	PR-chr20-19373	27.494
chr8	17420049	17420671	PR-chr8-6863	27.437
chr16	24907706	24908399	PR-chr16-11365	27.422
chr20	34992336	34993030	PR-chr20-11886	27.394
chr8	117532115	117532759	PR-chr8-49926	27.361
chr1	224026631	224027969	PR-chr1-84079	27.323
chr11	68343388	68344076	PR-chr11-24308	27.314
chr1	27147063	27147733	PR-chr1-9816	27.311
chr19	4751757	4752389	PR-chr19-1801	27.286
chr8	96193754	96194694	PR-chr8-40115	27.246
chr9	123252278	123253209	PR-chr9-37573	27.184
chr2	179481597	179484189	PR-chr2-70156	27.176
chr7	115743477	115745022	PR-chr7-49415	27.159
chr1	221909396	221910577	PR-chr1-82942	27.158
chr17	55289261	55289941	PR-chr17-21768	27.013
chr1	219894355	219894940	PR-chr1-81714	27
chr10	68611378	68611949	PR-chr10-25705	27
chr1	212518370	212519260	PR-chr1-77034	27
chr18	9793936	9795004	PR-chr18-4580	26.999
chr5	141329894	141330789	PR-chr5-53728	26.992
chr12	62760208	62761539	PR-chr12-29044	26.987
chr14	80124112	80124804	PR-chr14-24333	26.971
chr5	97792144	97792770	PR-chr5-36744	26.963
chr21	41997304	41997892	PR-chr21-8883	26.96
chr1	108534717	108535280	PR-chr1-34515	26.957
chr5	141701922	141702685	PR-chr5-53878	26.952
chr10	129046461	129047906	PR-chr10-53757	26.943
chr1	228306673	228308031	PR-chr1-86595	26.926
chr16	86638365	86639279	PR-chr16-33297	26.911
chr14	55683972	55685666	PR-chr14-13812	26.903
chr12	43972692	43973271	PR-chr12-21141	26.89
chr16	71427577	71428372	PR-chr16-26271	26.858
chr5	14774678	14775534	PR-chr5-6695	26.826
chr1	208339843	208340458	PR-chr1-74519	26.818
chr1	85536065	85537319	PR-chr1-28125	26.81
chr2	43839334	43840413	PR-chr2-18858	26.809
chr10	79285188	79286087	PR-chr10-30714	26.804
chr10	129948000	129950196	PR-chr10-54230	26.794
chr2	11640283	11640894	PR-chr2-5384	26.781
chr10	88841065	88841816	PR-chr10-34686	26.755
chr15	75148716	75150529	PR-chr15-24471	26.707
chr4	77657309	77657891	PR-chr4-27572	26.694
chr14	27921590	27922255	PR-chr14-3544	26.617
chr8	22900259	22900915	PR-chr8-9304	26.61
chr5	123363827	123365300	PR-chr5-46246	26.599
chr8	134407847	134408747	PR-chr8-58254	26.526
chr2	113062180	113063386	PR-chr2-43678	26.493
chr1	120562272	120562856	PR-chr1-39719	26.492
chr14	64051319	64052088	PR-chr14-17162	26.475
chr17	63803747	63805885	PR-chr17-26170	26.367
chr16	3635643	3636980	PR-chr16-2111	26.343
chr4	8356123	8356782	PR-chr4-3716	26.329
chr12	57710023	57711023	PR-chr12-27063	26.251
chr8	23115778	23116492	PR-chr8-9398	26.148
chr3	66721288	66722094	PR-chr3-26272	26.138
chr12	16517948	16519036	PR-chr12-9156	26.044
chr4	89460292	89461502	PR-chr4-32239	26.007
chr3	5513995	5515101	PR-chr3-2319	26.002
chr18	9844015	9847359	PR-chr18-4608	26
chr8	116919669	116920241	PR-chr8-49598	26
chr4	543563	544143	PR-chr4-156	26
chr15	88503264	88504041	PR-chr15-30370	25.999
chr4	88173340	88173954	PR-chr4-31768	25.999
chr8	133493583	133494259	PR-chr8-57740	25.995
chr17	75523464	75524312	PR-chr17-33148	25.995
chr9	99922729	99925177	PR-chr9-27981	25.992
chr9	113659519	113660180	PR-chr9-33485	25.987
chr17	67975882	67977328	PR-chr17-28601	25.986
chr1	57026278	57027245	PR-chr1-19621	25.963
chr20	31242749	31243402	PR-chr20-10202	25.958
chr20	36052323	36052941	PR-chr20-12390	25.945
chr20	39065521	39066772	PR-chr20-14060	25.944
chr15	44714106	44714745	PR-chr15-10160	25.936
chr3	112782782	112784211	PR-chr3-41467	25.925
chr13	23620663	23621376	PR-chr13-1591	25.919
chr7	1052623	1053562	PR-chr7-502	25.898
chr1	230880349	230881306	PR-chr1-88253	25.896
chr20	33357756	33359030	PR-chr20-11142	25.887
chr6	38225975	38226742	PR-chr6-14900	25.866
chr14	56278568	56279302	PR-chr14-14052	25.844
chr3	195122727	195123365	PR-chr3-74432	25.842
chr16	11754189	11754880	PR-chr16-6235	25.771
chr6	25114502	25115808	PR-chr6-10061	25.767
chr17	51604099	51605564	PR-chr17-19683	25.725
chr12	6352282	6352906	PR-chr12-3996	25.72
chr8	142097729	142098464	PR-chr8-62159	25.708
chr4	74307305	74308002	PR-chr4-26350	25.689
chr1	110668648	110669363	PR-chr1-35320	25.621
chr8	103979227	103980069	PR-chr8-43872	25.621
chr6	6666659	6667298	PR-chr6-2734	25.617
chr12	13745612	13747000	PR-chr12-7575	25.591
chr5	174068763	174069440	PR-chr5-68281	25.56
chr1	6395439	6396138	PR-chr1-2338	25.556
chr5	128492703	128493319	PR-chr5-48369	25.545
chr13	108959788	108960828	PR-chr13-35402	25.483
chr10	75485515	75486865	PR-chr10-28816	25.447
chr1	198650970	198652479	PR-chr1-68310	25.447
chr1	5942113	5942886	PR-chr1-2130	25.366
chr3	139552309	139553491	PR-chr3-52500	25.36
chr7	138216554	138217537	PR-chr7-58441	25.303
chr10	35108787	35111040	PR-chr10-14807	25.291
chr21	46805209	46806510	PR-chr21-10667	25.279
chr6	134835368	134836115	PR-chr6-45294	25.249
chr8	22296489	22297758	PR-chr8-9010	25.239
chr16	11825509	11826430	PR-chr16-6274	25.237
chr9	92875111	92876030	PR-chr9-25198	25.178
chr16	11793882	11794817	PR-chr16-6266	25.137
chr3	15309359	15310291	PR-chr3-6394	25.115
chr10	23409930	23410852	PR-chr10-10106	25.092
chr14	90826540	90827533	PR-chr14-29508	25.091
chr1	116674363	116675708	PR-chr1-37803	25.079
chr6	21664846	21665681	PR-chr6-8718	25.052
chr1	161895451	161896122	PR-chr1-48779	25.029
chr7	105579745	105580471	PR-chr7-45453	25.022
chr14	98502453	98503017	PR-chr14-33634	25
chr5	173243719	173244647	PR-chr5-67907	25
chr3	170954957	170955510	PR-chr3-64404	24.999
chrX	128154093	128155122	PR-chrX-36374	24.999
chr5	115805814	115806444	PR-chr5-43362	24.994
chr1	61539781	61540569	PR-chr1-21103	24.993
chr11	128692515	128693140	PR-chr11-46360	24.985
chr18	44168921	44169654	PR-chr18-20568	24.982
chr17	25695535	25696561	PR-chr17-8232	24.981
chr1	167313923	167315558	PR-chr1-51692	24.979
chr12	13146176	13147304	PR-chr12-7185	24.977
chr2	130668616	130669815	PR-chr2-50273	24.958
chr8	141388484	141389133	PR-chr8-61817	24.953
chr7	37207194	37208671	PR-chr7-20988	24.953
chr11	113535771	113537276	PR-chr11-40293	24.942
chr6	106657659	106658620	PR-chr6-37081	24.941
chr9	110511928	110513048	PR-chr9-32112	24.94
chr22	27684481	27685136	PR-chr22-6068	24.939
chr8	81609042	81609847	PR-chr8-33840	24.935
chr5	102733927	102735091	PR-chr5-38337	24.934
chr2	113413443	113414223	PR-chr2-43835	24.93
chr12	7950758	7951402	PR-chr12-4767	24.918
chrX	71756998	71758567	PR-chrX-22096	24.911
chr5	31507644	31508903	PR-chr5-12406	24.906
chr9	33239240	33239852	PR-chr9-13112	24.896
chr5	172831773	172832917	PR-chr5-67673	24.893
chr11	34728002	34728829	PR-chr11-13713	24.883
chr1	24616400	24617182	PR-chr1-8837	24.868
chr21	43586956	43587951	PR-chr21-9475	24.843
chr17	46341463	46342150	PR-chr17-17156	24.841
chr18	69713514	69714339	PR-chr18-33211	24.808
chr22	45220839	45221727	PR-chr22-13255	24.807
chr19	47851768	47852663	PR-chr19-14076	24.773
chr6	83335839	83336788	PR-chr6-29223	24.727
chr10	29436723	29437321	PR-chr10-12461	24.725
chr8	134755572	134756883	PR-chr8-58473	24.677
chr18	72261723	72262464	PR-chr18-34708	24.655
chr20	46750609	46751207	PR-chr20-18128	24.655
chr21	37952971	37953709	PR-chr21-7433	24.618
chr15	38866599	38867354	PR-chr15-7728	24.586
chr11	35136594	35137397	PR-chr11-13881	24.562
chr1	212455692	212458360	PR-chr1-76989	24.518
chrX	9357856	9358440	PR-chrX-2956	24.515
chr17	31139639	31140515	PR-chr17-10431	24.51
chr4	75207508	75208970	PR-chr4-26671	24.448
chr11	9697540	9698135	PR-chr11-3604	24.399
chr17	41542747	41543344	PR-chr17-14763	24.335
chr11	57303374	57303946	PR-chr11-20240	24.325
chr11	92233692	92235029	PR-chr11-33115	24.314
chr12	15232224	15233250	PR-chr12-8388	24.284
chr5	6572031	6573369	PR-chr5-3149	24.226
chr15	40004661	40005248	PR-chr15-8240	24.223
chr10	14341821	14342835	PR-chr10-6615	24.185
chr2	30941399	30942100	PR-chr2-13723	24.147
chr4	123742819	123743868	PR-chr4-44857	24.12
chr20	43577511	43578350	PR-chr20-16452	24.015
chr13	42025116	42026290	PR-chr13-9148	24
chr15	55676801	55677791	PR-chr15-14965	24
chr2	150730323	150731739	PR-chr2-58141	24
chr4	9607412	9608056	PR-chr4-4107	24
chr5	14214125	14214714	PR-chr5-6392	24
chr10	89344255	89345112	PR-chr10-34794	23.998
chr17	55257588	55258161	PR-chr17-21745	23.995
chrX	66779557	66780897	PR-chrX-20517	23.993
chr14	79921119	79922290	PR-chr14-24225	23.992
chr22	34097845	34098608	PR-chr22-9370	23.991
chr7	13048761	13049345	PR-chr7-6901	23.985
chr1	49170131	49170750	PR-chr1-17379	23.982
chr10	122804303	122805093	PR-chr10-50412	23.966
chr12	32479747	32480868	PR-chr12-17130	23.966
chr10	14662570	14663150	PR-chr10-6756	23.965
chr1	215138628	215140502	PR-chr1-78742	23.957
chr9	113813754	113815275	PR-chr9-33543	23.93
chr2	1026540	1027133	PR-chr2-477	23.923
chr7	101439403	101440064	PR-chr7-43878	23.917
chr10	5545160	5545840	PR-chr10-2590	23.905
chr18	50015199	50016821	PR-chr18-23541	23.894
chr18	11645081	11645656	PR-chr18-5527	23.894
chr8	87498147	87499088	PR-chr8-36278	23.888
chr2	21068515	21069121	PR-chr2-9398	23.883
chr4	111674439	111674967	PR-chr4-40460	23.877
chr13	109193743	109195567	PR-chr13-35527	23.873
chr7	50537264	50538107	PR-chr7-27581	23.862
chr17	16930586	16931815	PR-chr17-5380	23.852
chr10	51931076	51932114	PR-chr10-18876	23.842
chr22	16256461	16257133	PR-chr22-461	23.824
chr2	166376906	166377566	PR-chr2-64464	23.814
chr8	81827632	81828854	PR-chr8-33958	23.799
chr9	97703455	97704110	PR-chr9-27155	23.798
chr14	92521732	92522829	PR-chr14-30354	23.764
chr8	110651834	110652568	PR-chr8-47001	23.737
chr20	39461382	39462076	PR-chr20-14298	23.729
chr1	38247198	38247886	PR-chr1-13682	23.685
chr12	100533888	100534468	PR-chr12-44920	23.663
chr8	133980282	133981129	PR-chr8-57982	23.656
chr14	99115086	99115725	PR-chr14-34009	23.654
chr3	142476364	142477115	PR-chr3-53681	23.646
chr6	149423730	149424535	PR-chr6-49891	23.646
chr13	23194544	23195595	PR-chr13-1402	23.6
chr2	172327458	172328299	PR-chr2-66898	23.566
chr7	22486321	22487512	PR-chr7-12294	23.548
chr2	70462109	70463501	PR-chr2-29860	23.477
chr5	145379761	145380387	PR-chr5-55409	23.452
chr2	172362989	172363624	PR-chr2-66911	23.327
chr22	28524399	28526005	PR-chr22-6539	23.279
chr15	83932117	83932792	PR-chr15-28165	23.244
chr10	91928918	91929999	PR-chr10-35942	23.215
chr8	102442171	102442790	PR-chr8-43064	23.134
chr5	76022448	76023653	PR-chr5-27975	23.095
chr1	230524510	230525450	PR-chr1-87982	23.071
chr16	69609381	69611217	PR-chr16-25516	23.038
chr14	22684669	22685309	PR-chr14-1468	23
chr15	61132317	61132872	PR-chr15-17815	22.998
chr20	51646166	51647640	PR-chr20-20768	22.997
chr4	15665461	15666106	PR-chr4-6540	22.993
chr7	38709737	38710547	PR-chr7-21853	22.993
chr11	76161008	76161715	PR-chr11-27872	22.992
chr20	37332752	37333720	PR-chr20-13086	22.991
chr2	65390104	65390843	PR-chr2-27600	22.987
chr3	189261398	189262241	PR-chr3-71909	22.985
chr12	6953151	6954090	PR-chr12-4374	22.969
chr16	84066203	84066831	PR-chr16-32016	22.967
chrX	40611427	40612092	PR-chrX-15146	22.965
chr2	173610736	173612112	PR-chr2-67443	22.957
chr22	36948356	36949309	PR-chr22-10543	22.954
chr10	29699188	29700427	PR-chr10-12594	22.95
chr8	40536337	40537057	PR-chr8-17095	22.947
chr17	39577718	39578501	PR-chr17-13891	22.945
chr7	7327606	7328284	PR-chr7-3862	22.944
chr4	40839957	40840618	PR-chr4-16166	22.935
chr1	244395355	244396554	PR-chr1-96006	22.932
chr1	241782228	241783935	PR-chr1-94540	22.923
chr5	74419924	74421239	PR-chr5-27360	22.922
chr20	61756987	61757737	PR-chr20-26591	22.908
chr8	102846273	102847561	PR-chr8-43293	22.892
chr8	115618580	115620311	PR-chr8-48977	22.891
chr2	200650063	200650685	PR-chr2-78015	22.874
chr19	39415355	39416461	PR-chr19-10859	22.849
chr22	16794043	16794677	PR-chr22-770	22.845
chr3	190496005	190496976	PR-chr3-72518	22.845
chr7	45590791	45591398	PR-chr7-25622	22.844
chr17	72637515	72638092	PR-chr17-31418	22.831
chr2	120821533	120822911	PR-chr2-46618	22.814
chr1	60006957	60007798	PR-chr1-20586	22.791
chr15	29414817	29415853	PR-chr15-3355	22.787
chr20	19594015	19594696	PR-chr20-6651	22.785
chr17	4010817	4012183	PR-chr17-1249	22.77
chr4	149446282	149447242	PR-chr4-54074	22.741
chr1	165371501	165372533	PR-chr1-50591	22.739
chr13	30564618	30565693	PR-chr13-4401	22.739
chr14	29989365	29990666	PR-chr14-4353	22.709
chr15	54119804	54120484	PR-chr15-14297	22.68
chr2	39528692	39529275	PR-chr2-17011	22.656
chr6	34673925	34675352	PR-chr6-13458	22.653
chr8	30784168	30785080	PR-chr8-12785	22.606
chr1	185857447	185859062	PR-chr1-62051	22.596
chr4	25165404	25166379	PR-chr4-10404	22.555
chr2	1820121	1820857	PR-chr2-861	22.501
chr1	235083990	235084574	PR-chr1-90880	22.489
chr4	102351281	102352170	PR-chr4-37044	22.464
chr4	111070655	111071951	PR-chr4-40209	22.452
chr6	34676992	34679135	PR-chr6-13459	22.417
chr22	44372075	44373001	PR-chr22-12916	22.414
chr12	129148021	129149129	PR-chr12-56706	22.397
chr1	171168557	171169170	PR-chr1-53642	22.372
chr13	40412547	40413454	PR-chr13-8476	22.346
chr5	56088567	56089168	PR-chr5-20485	22.336
chrX	40212212	40212895	PR-chrX-14993	22.331
chr19	18669508	18671146	PR-chr19-6332	22.265
chr10	21512909	21513695	PR-chr10-9386	22.231
chr5	73244484	73245455	PR-chr5-26811	22.206
chr2	113786849	113787442	PR-chr2-44004	22.193
chrX	9365609	9366284	PR-chrX-2958	22.117
chr9	96810113	96811047	PR-chr9-26719	22.107
chr7	45895354	45896155	PR-chr7-25753	22.102
chr17	75691174	75691796	PR-chr17-33259	22.094
chr2	182650231	182650961	PR-chr2-71427	22.084
chr16	53016834	53017963	PR-chr16-18163	22.084
chr5	95196185	95197010	PR-chr5-35681	22.077
chr2	65657170	65658011	PR-chr2-27718	22.027
chr2	238858944	238859805	PR-chr2-94616	22.022
chr20	39779298	39780434	PR-chr20-14467	22.003
chr10	63529071	63529711	PR-chr10-23673	22
chr11	62032212	62033174	PR-chr11-21583	22
chr11	71569394	71569852	PR-chr11-26182	22
chr20	17934636	17935233	PR-chr20-6048	22
chr21	23730044	23730599	PR-chr21-2813	22
chr22	24354347	24354979	PR-chr22-4252	22
chr5	168854544	168855127	PR-chr5-65802	22
chr6	51209711	51211224	PR-chr6-20013	22
chr10	79299736	79300309	PR-chr10-30722	21.999
chr1	42087529	42088114	PR-chr1-14963	21.999
chr16	30658455	30660785	PR-chr16-13573	21.998
chr15	66033981	66034643	PR-chr15-20251	21.99
chr17	7900299	7901053	PR-chr17-2582	21.988
chr3	101265220	101266230	PR-chr3-37364	21.979
chr1	150211989	150212570	PR-chr1-42715	21.977
chr12	123978232	123979241	PR-chr12-54508	21.973
chr7	12955388	12956344	PR-chr7-6846	21.966
chr18	21002391	21003068	PR-chr18-9091	21.957
chr5	167611078	167611750	PR-chr5-65171	21.94
chr3	58110010	58110600	PR-chr3-22832	21.939
chr15	69689387	69690357	PR-chr15-22050	21.922
chr7	135297972	135298561	PR-chr7-57344	21.915
chr11	125877237	125877798	PR-chr11-45191	21.907
chr13	76780956	76781794	PR-chr13-22492	21.886
chr10	121404974	121405853	PR-chr10-49774	21.884
chr22	29118404	29120213	PR-chr22-6871	21.865
chr20	10789977	10790647	PR-chr20-3418	21.857
chr6	168049928	168050864	PR-chr6-56083	21.846
chr2	118715974	118716891	PR-chr2-45755	21.835
chr2	74925744	74926518	PR-chr2-31693	21.834
chr17	71953693	71955437	PR-chr17-31029	21.824
chr6	44134183	44134786	PR-chr6-17352	21.808
chr2	20537477	20538745	PR-chr2-9147	21.78
chr15	66419830	66421236	PR-chr15-20416	21.77
chr16	66285772	66286451	PR-chr16-23904	21.759
chr8	48718841	48719509	PR-chr8-19037	21.754
chr9	101977348	101978264	PR-chr9-28829	21.725
chr7	43267411	43267965	PR-chr7-24563	21.719
chr1	227055939	227057043	PR-chr1-85830	21.718
chr10	126367326	126368333	PR-chr10-52345	21.677
chr11	90536320	90537097	PR-chr11-32475	21.648
chr11	130028302	130029674	PR-chr11-46857	21.618
chr16	86668293	86668937	PR-chr16-33312	21.527
chr2	95700166	95700839	PR-chr2-37337	21.522
chr8	105977170	105978091	PR-chr8-44761	21.515
chr8	133443625	133445962	PR-chr8-57715	21.514
chr13	31179711	31180500	PR-chr13-4656	21.501
chr10	120708479	120710114	PR-chr10-49418	21.43
chr9	5616945	5617775	PR-chr9-2290	21.387
chr9	90338337	90338941	PR-chr9-24106	21.363
chr1	219860828	219862099	PR-chr1-81700	21.341
chr17	52467989	52468732	PR-chr17-20195	21.334
chr1	158412886	158413811	PR-chr1-47069	21.25
chr15	85864324	85864859	PR-chr15-29047	21.243
chr19	7395775	7396403	PR-chr19-2633	21.153
chr8	29439695	29440399	PR-chr8-12166	21.143
chr17	68037709	68038600	PR-chr17-28639	21.133
chr15	83881066	83881748	PR-chr15-28128	21.113
chr2	28737775	28738379	PR-chr2-12694	21.11
chr5	73721109	73721812	PR-chr5-27066	21.105
chr12	63836636	63837601	PR-chr12-29690	21
chr14	98448683	98449345	PR-chr14-33603	21
chr20	34162361	34163060	PR-chr20-11508	21
chr9	14096623	14097254	PR-chr9-5638	21
chr12	75184561	75185151	PR-chr12-35299	21
chr17	58156782	58157387	PR-chr17-23069	21
chr9	24364076	24364686	PR-chr9-9766	20.999
chr16	11225433	11226046	PR-chr16-5988	20.998
chr11	85478175	85478955	PR-chr11-31036	20.995
chrX	149792683	149793283	PR-chrX-43548	20.993
chr5	93764834	93765430	PR-chr5-35056	20.992
chr18	43937944	43938742	PR-chr18-20435	20.99
chr7	137529764	137530388	PR-chr7-58244	20.987
chrX	81955289	81956490	PR-chrX-23896	20.981
chr10	115697300	115697864	PR-chr10-46983	20.98
chr4	140697757	140700288	PR-chr4-50660	20.98
chr17	37539082	37539921	PR-chr17-13053	20.977
chr1	160401273	160402430	PR-chr1-47998	20.975
chr16	51722893	51723492	PR-chr16-17613	20.971
chr16	25037884	25038932	PR-chr16-11427	20.957
chr13	66880828	66881396	PR-chr13-18503	20.955
chr12	32961288	32961890	PR-chr12-17412	20.953
chr10	95184678	95185279	PR-chr10-37289	20.951
chr8	99994686	99995376	PR-chr8-41908	20.94
chrX	41140514	41141139	PR-chrX-15323	20.937
chr12	87788096	87788685	PR-chr12-39898	20.933
chr16	66224041	66224870	PR-chr16-23858	20.91
chr6	35617639	35618258	PR-chr6-13857	20.891
chr8	67096971	67097864	PR-chr8-27229	20.89
chr7	11766285	11767633	PR-chr7-6241	20.86
chr18	18443271	18444193	PR-chr18-7763	20.85
chr14	89103302	89103994	PR-chr14-28635	20.846
chr14	69179558	69180272	PR-chr14-19395	20.843
chr1	148494845	148495510	PR-chr1-41790	20.783
chr4	154129917	154130731	PR-chr4-56014	20.761
chr2	159675964	159676804	PR-chr2-61721	20.733
chr9	89880465	89881875	PR-chr9-23955	20.72
chr7	83628554	83629433	PR-chr7-36962	20.709
chr5	167050736	167051358	PR-chr5-64809	20.695
chrX	109073499	109074308	PR-chrX-30713	20.682
chr5	57458819	57460285	PR-chr5-21020	20.673
chr16	1885716	1886694	PR-chr16-1192	20.642
chrX	133649758	133650488	PR-chrX-38516	20.638
chr10	126423123	126425040	PR-chr10-52387	20.634
chr10	108256238	108257321	PR-chr10-43375	20.614
chr11	101682080	101682677	PR-chr11-36148	20.612
chr2	230017784	230018412	PR-chr2-90620	20.611
chr6	133170433	133171667	PR-chr6-44741	20.567
chr1	220072178	220073247	PR-chr1-81833	20.546
chr5	130993945	130994655	PR-chr5-49145	20.518
chr4	77751473	77752432	PR-chr4-27634	20.504
chr6	149424668	149425264	PR-chr6-49892	20.503
chr12	14990955	14992260	PR-chr12-8254	20.486
chr3	153470587	153471272	PR-chr3-58004	20.416
chr20	25205780	25207278	PR-chr20-8909	20.405
chr11	92901277	92902612	PR-chr11-33336	20.364
chr8	63732751	63734202	PR-chr8-25733	20.325
chr2	160792582	160794870	PR-chr2-62175	20.297
chr8	70222425	70223458	PR-chr8-28673	20.267
chr20	47431412	47432327	PR-chr20-18474	20.26
chr10	3968041	3968916	PR-chr10-1929	20.218
chr2	5967156	5968094	PR-chr2-2698	20.139
chr19	19562913	19563652	PR-chr19-6744	20.119
chr4	7009679	7010359	PR-chr4-3003	20.117
chr12	32937555	32938191	PR-chr12-17404	20.105
chr15	37816140	37817283	PR-chr15-7167	20.089
chr6	134984423	134985130	PR-chr6-45346	20.082
chr22	23879685	23880948	PR-chr22-4057	20.035
chr13	23250827	23251464	PR-chr13-1429	20
chr1	1778514	1780173	PR-chr1-463	20
chr1	21475227	21475918	PR-chr1-7777	20
chr4	82626546	82627130	PR-chr4-29587	20
chr5	147627982	147628669	PR-chr5-56358	20
chrX	22644331	22645135	PR-chrX-8593	20
chrX	28051755	28052320	PR-chrX-10471	20
chr2	20270792	20272220	PR-chr2-9020	20
chr10	486849	487430	PR-chr10-176	20
chr10	15240371	15241112	PR-chr10-6980	19.999
chr8	102624420	102625205	PR-chr8-43161	19.999
chr4	166332490	166333344	PR-chr4-60607	19.998
chr17	65241182	65242001	PR-chr17-26940	19.994
chr3	33219109	33219845	PR-chr3-13281	19.993
chr12	7056713	7057343	PR-chr12-4427	19.992
chr16	55198462	55199098	PR-chr16-19148	19.988
chr10	101559801	101560393	PR-chr10-40095	19.982
chr13	72762823	72763485	PR-chr13-20718	19.981
chr20	14773688	14774680	PR-chr20-4782	19.981
chr3	139484254	139484842	PR-chr3-52464	19.977
chr21	31216377	31217462	PR-chr21-5014	19.975
chr1	209589496	209590370	PR-chr1-75260	19.971
chr12	115695181	115696017	PR-chr12-51183	19.967
chr5	173995642	173996586	PR-chr5-68242	19.96
chr13	29597793	29598439	PR-chr13-3977	19.956
chr12	48931643	48932398	PR-chr12-23105	19.952
chr5	42057550	42058730	PR-chr5-16509	19.947
chr8	19220794	19222381	PR-chr8-7595	19.944
chr8	133501655	133502609	PR-chr8-57746	19.926
chr8	122512696	122513733	PR-chr8-52445	19.905
chrX	16489582	16490276	PR-chrX-6125	19.883
chr12	121737615	121739397	PR-chr12-53533	19.877
chr19	18478649	18479352	PR-chr19-6259	19.853
chr10	73684733	73685359	PR-chr10-28065	19.809
chr3	179285052	179286735	PR-chr3-67809	19.786
chr10	95130630	95131527	PR-chr10-37257	19.777
chr11	35341830	35342541	PR-chr11-14012	19.74
chr13	61242723	61243311	PR-chr13-16496	19.734
chr20	34994694	34995324	PR-chr20-11887	19.73
chr13	42610921	42611682	PR-chr13-9395	19.726
chr5	138585318	138585902	PR-chr5-52496	19.723
chr6	106353482	106354238	PR-chr6-36941	19.722
chr10	74547596	74548116	PR-chr10-28393	19.709
chr4	174353076	174353694	PR-chr4-63482	19.685
chr9	79517270	79519143	PR-chr9-19786	19.677
chr5	111738161	111739090	PR-chr5-41838	19.671
chr1	164059390	164060361	PR-chr1-49933	19.658
chr17	70966549	70968383	PR-chr17-30431	19.64
chr4	109199207	109200155	PR-chr4-39400	19.606
chr3	161877837	161878477	PR-chr3-61354	19.603
chr14	97424191	97425050	PR-chr14-33012	19.581
chr6	135575086	135576316	PR-chr6-45536	19.514
chr6	105918820	105919456	PR-chr6-36750	19.51
chrX	13029235	13030194	PR-chrX-4699	19.508
chr21	35028745	35029399	PR-chr21-6303	19.483
chr18	31430508	31431492	PR-chr18-13907	19.481
chr9	139678794	139679432	PR-chr9-45051	19.452
chr9	131122553	131123181	PR-chr9-41026	19.419
chr11	72461254	72462269	PR-chr11-26534	19.391
chr8	81463231	81464918	PR-chr8-33775	19.386
chr8	125750444	125751066	PR-chr8-53997	19.36
chr17	31067862	31068670	PR-chr17-10395	19.348
chr2	223672344	223673407	PR-chr2-87987	19.157
chr10	78860323	78861519	PR-chr10-30496	19.144
chr1	209569733	209570734	PR-chr1-75247	19.117
chr12	96929814	96930294	PR-chr12-43581	19.093
chr20	21462862	21463626	PR-chr20-7437	19.085
chr18	3523371	3524546	PR-chr18-1531	19.06
chr13	34288269	34288860	PR-chr13-5982	19.053
chr14	102088936	102089544	PR-chr14-35582	19.048
chr8	92525889	92527467	PR-chr8-38359	19.043
chr11	123993415	123994011	PR-chr11-44426	19.009
chr8	116739332	116740362	PR-chr8-49507	19.002
chr11	26888633	26889293	PR-chr11-10462	19
chr16	14983805	14984371	PR-chr16-7691	19
chr4	129712214	129712785	PR-chr4-47032	19
chr7	16816258	16817255	PR-chr7-9011	19
chr1	198354325	198355041	PR-chr1-68106	19
chr2	85618280	85619166	PR-chr2-35573	19
chr10	122826130	122827267	PR-chr10-50422	18.999
chr12	120222128	120222728	PR-chr12-53024	18.999
chr1	36646564	36647096	PR-chr1-13096	18.999
chr3	195394303	195395248	PR-chr3-74583	18.999
chr8	82371883	82373578	PR-chr8-34241	18.999
chr9	100405743	100406804	PR-chr9-28191	18.995
chr13	52668645	52670073	PR-chr13-13489	18.991
chr12	41545297	41546086	PR-chr12-20229	18.988
chr12	57021700	57022705	PR-chr12-26756	18.98
chr3	191324181	191324968	PR-chr3-72891	18.98
chr6	43986402	43987337	PR-chr6-17274	18.978
chr15	85182974	85183754	PR-chr15-28778	18.976
chr7	25668965	25669593	PR-chr7-14024	18.967
chrX	67500387	67501087	PR-chrX-20692	18.961
chr12	15318799	15319357	PR-chr12-8442	18.96
chr1	32170198	32171089	PR-chr1-11578	18.96
chr2	179329854	179330648	PR-chr2-70066	18.956
chr14	78873798	78874436	PR-chr14-23702	18.952
chr5	40342725	40343352	PR-chr5-15875	18.951
chr13	46067604	46068224	PR-chr13-10892	18.933
chr3	138272488	138273320	PR-chr3-52007	18.932
chr12	10796514	10797849	PR-chr12-6028	18.903
chr16	55856395	55857093	PR-chr16-19463	18.896
chr15	88821492	88822131	PR-chr15-30544	18.889
chr4	56871238	56871910	PR-chr4-20879	18.886
chr17	6392518	6393109	PR-chr17-2053	18.876
chr12	92233658	92234753	PR-chr12-41755	18.855
chr1	244183556	244184086	PR-chr1-95861	18.843
chr5	96329502	96330592	PR-chr5-36252	18.836
chr2	38508216	38509074	PR-chr2-16565	18.83
chr7	12656114	12657000	PR-chr7-6680	18.826
chr12	29769600	29770634	PR-chr12-16018	18.821
chr5	158361945	158363165	PR-chr5-61080	18.821
chr6	44186037	44186688	PR-chr6-17383	18.809
chr7	34063113	34064543	PR-chr7-19212	18.802
chr18	13292100	13293503	PR-chr18-6305	18.8
chr1	61537660	61538236	PR-chr1-21102	18.796
chrX	15197403	15198825	PR-chrX-5568	18.79
chr6	160258113	160258991	PR-chr6-53429	18.789
chr20	56039971	56040771	PR-chr20-23044	18.785
chr2	47051146	47051851	PR-chr2-20360	18.766
chr15	76091917	76092524	PR-chr15-24926	18.75
chr5	14314034	14314720	PR-chr5-6455	18.732
chr6	15531423	15532156	PR-chr6-6335	18.727
chr1	178349776	178351567	PR-chr1-57564	18.696
chr1	229341329	229342910	PR-chr1-87255	18.686
chr20	16488803	16489328	PR-chr20-5479	18.685
chr5	169336310	169337148	PR-chr5-66061	18.683
chr20	20668991	20669579	PR-chr20-7136	18.671
chr5	71802234	71802909	PR-chr5-26173	18.662
chr17	55492524	55493247	PR-chr17-21855	18.652
chrX	22544809	22545399	PR-chrX-8550	18.641
chr5	67025109	67026365	PR-chr5-24883	18.631
chr15	48308183	48308805	PR-chr15-11839	18.622
chr2	132513614	132514394	PR-chr2-50742	18.609
chr17	77685104	77685809	PR-chr17-34538	18.603
chr1	109172403	109173717	PR-chr1-34643	18.602
chr4	106767379	106768027	PR-chr4-38509	18.572
chr8	41574696	41576268	PR-chr8-17719	18.555
chr9	94542565	94543527	PR-chr9-25856	18.54
chr4	158502745	158504671	PR-chr4-57821	18.526
chr7	134254239	134255522	PR-chr7-56931	18.512
chr17	38877023	38878003	PR-chr17-13575	18.508
chr4	109212530	109213612	PR-chr4-39409	18.419
chr11	82799258	82800895	PR-chr11-30061	18.418
chr19	37852321	37853323	PR-chr19-10166	18.39
chr5	109351406	109351996	PR-chr5-40969	18.379
chr4	9616743	9617494	PR-chr4-4110	18.378
chr16	23328539	23329304	PR-chr16-10695	18.324
chr5	54932486	54933465	PR-chr5-19984	18.303
chr11	106869915	106870494	PR-chr11-37854	18.287
chr18	60012470	60013403	PR-chr18-28828	18.282
chr6	35801288	35802068	PR-chr6-13916	18.274
chr17	73546670	73550191	PR-chr17-31987	18.198
chr13	98021889	98023091	PR-chr13-30564	18.169
chr12	42987167	42988523	PR-chr12-20785	18.152
chr12	6339624	6340273	PR-chr12-3989	18.152
chr4	89728469	89729057	PR-chr4-32329	18.118
chr16	68753150	68754311	PR-chr16-25048	18.033
chr3	42560818	42561712	PR-chr3-16606	18.033
chr12	33277780	33278965	PR-chr12-17547	18.009
chr18	9326841	9327552	PR-chr18-4366	18.007
chr10	76326862	76327518	PR-chr10-29135	18
chr13	82537214	82537930	PR-chr13-24642	18
chr13	96591927	96593017	PR-chr13-29905	18
chr14	45237690	45238822	PR-chr14-9749	18
chr14	49082935	49083842	PR-chr14-11061	18
chr15	83923087	83923676	PR-chr15-28159	18
chr17	55285199	55286148	PR-chr17-21765	18
chr1	142758861	142759442	PR-chr1-40100	18
chr21	41974441	41975130	PR-chr21-8872	18
chr3	162627313	162627939	PR-chr3-61634	18
chr4	140005567	140006426	PR-chr4-50413	18
chr7	105634336	105635169	PR-chr7-45471	18
chr8	130028006	130029101	PR-chr8-56083	18
chrX	53117378	53117976	PR-chrX-18595	18
chrX	47306612	47307632	PR-chrX-17207	18
chr15	40628513	40629101	PR-chr15-8551	17.999
chr1	207786255	207786906	PR-chr1-74173	17.997
chr2	59705076	59705963	PR-chr2-25375	17.997
chr2	208306806	208307741	PR-chr2-81209	17.992
chrX	12992629	12993205	PR-chrX-4675	17.991
chr1	44021738	44022640	PR-chr1-15567	17.99
chr5	176303806	176304417	PR-chr5-69121	17.987
chr1	182857209	182858974	PR-chr1-60338	17.987
chr1	10498669	10500221	PR-chr1-3832	17.985
chr2	132913593	132914591	PR-chr2-50840	17.985
chr16	71432877	71433453	PR-chr16-26275	17.984
chr7	130619942	130620521	PR-chr7-55162	17.981
chr9	110280172	110281691	PR-chr9-31994	17.981
chr1	68118396	68118986	PR-chr1-23134	17.979
chr14	94845230	94845863	PR-chr14-31577	17.973
chr9	33426933	33428115	PR-chr9-13196	17.973
chr9	100848707	100850392	PR-chr9-28385	17.956
chr17	47040277	47041062	PR-chr17-17500	17.953
chr9	90303476	90304237	PR-chr9-24092	17.953
chr8	42613435	42614111	PR-chr8-18365	17.93
chr10	5535270	5535995	PR-chr10-2586	17.924
chr1	207718804	207719986	PR-chr1-74136	17.923
chr1	85065797	85066657	PR-chr1-27964	17.921
chr3	186363200	186363844	PR-chr3-70634	17.916
chr20	61310075	61311046	PR-chr20-26276	17.915
chr4	27889339	27889931	PR-chr4-11456	17.906
chr7	95075910	95076866	PR-chr7-41401	17.904
chr1	198540452	198541213	PR-chr1-68235	17.902
chr6	148621454	148622330	PR-chr6-49602	17.9
chr17	62395361	62396131	PR-chr17-25484	17.894
chr14	61096603	61097163	PR-chr14-16029	17.891
chr6	132186079	132186649	PR-chr6-44410	17.89
chr2	9269001	9270302	PR-chr2-4251	17.888
chrX	92363442	92364428	PR-chrX-25633	17.87
chr1	198247865	198248461	PR-chr1-68030	17.865
chr16	3193763	3194264	PR-chr16-1891	17.863
chr3	195361533	195362485	PR-chr3-74564	17.86
chr9	115483620	115485083	PR-chr9-34217	17.844
chr16	71576529	71577882	PR-chr16-26371	17.824
chr21	38886556	38887211	PR-chr21-7790	17.802
chr2	175600930	175601512	PR-chr2-68314	17.783
chr1	220249544	220251186	PR-chr1-81938	17.761
chr7	130736044	130736681	PR-chr7-55201	17.76
chr1	37278738	37279430	PR-chr1-13309	17.742
chr8	133448788	133449448	PR-chr8-57716	17.712
chr9	23672883	23673464	PR-chr9-9498	17.685
chr1	51805713	51806359	PR-chr1-18058	17.657
chr17	53333416	53334264	PR-chr17-20779	17.64
chrX	10559648	10560565	PR-chrX-3565	17.631
chr2	114305226	114305866	PR-chr2-44142	17.616
chr4	144161240	144161897	PR-chr4-52077	17.612
chr2	98361935	98363146	PR-chr2-38212	17.612
chr4	30477490	30478542	PR-chr4-12426	17.606
chr1	215123941	215124931	PR-chr1-78730	17.571
chr10	24592119	24592797	PR-chr10-10542	17.53
chr10	90765890	90766565	PR-chr10-35481	17.524
chr2	179791765	179792395	PR-chr2-70262	17.515
chr3	158106685	158107263	PR-chr3-59791	17.513
chr14	39132356	39132983	PR-chr14-7907	17.494
chr4	57182906	57183831	PR-chr4-20987	17.459
chr7	104684414	104685024	PR-chr7-45071	17.428
chr12	52484400	52485059	PR-chr12-24692	17.425
chrX	71384041	71385021	PR-chrX-21974	17.39
chr1	207485449	207486915	PR-chr1-73982	17.385
chr12	92695022	92695602	PR-chr12-41927	17.359
chr12	62542155	62542733	PR-chr12-28892	17.321
chr15	38182412	38183063	PR-chr15-7358	17.32
chr7	39760645	39761408	PR-chr7-22555	17.31
chr4	11116007	11116739	PR-chr4-4819	17.302
chr11	72529445	72530013	PR-chr11-26547	17.262
chr13	32794078	32794786	PR-chr13-5374	17.239
chr11	65897281	65897687	PR-chr11-22995	17.229
chr2	219971774	219972369	PR-chr2-86240	17.226
chr2	127108293	127109783	PR-chr2-49001	17.197
chr19	18740459	18741936	PR-chr19-6366	17.188
chr11	130119816	130120777	PR-chr11-46888	17.162
chr1	149474444	149475544	PR-chr1-42310	17.138
chr11	101401986	101402745	PR-chr11-36056	17.133
chr18	19946348	19947503	PR-chr18-8519	17.114
chr18	33873272	33875364	PR-chr18-15164	17.048
chr3	66729177	66730011	PR-chr3-26274	17.043
chr2	172981020	172981608	PR-chr2-67165	17.036
chr9	2668079	2668996	PR-chr9-1118	17.03
chr11	77648370	77649285	PR-chr11-28302	17
chr12	43899455	43900043	PR-chr12-21112	17
chr1	153261884	153262463	PR-chr1-44415	17
chr3	22175688	22176261	PR-chr3-8993	17
chr3	27371191	27371803	PR-chr3-11068	17
chr7	21967965	21968628	PR-chr7-11939	17
chr8	128959039	128959745	PR-chr8-55511	17
chr12	119041427	119042369	PR-chr12-52556	17
chr20	30255391	30257491	PR-chr20-9711	17
chr4	159317108	159318992	PR-chr4-58132	17
chr11	76162554	76163148	PR-chr11-27873	16.999
chr5	169140824	169141491	PR-chr5-65946	16.996
chr2	42462799	42463375	PR-chr2-18268	16.992
chr3	24156414	24157028	PR-chr3-9736	16.987
chr12	30380082	30380598	PR-chr12-16301	16.983
chr8	102866971	102868712	PR-chr8-43304	16.982
chr10	72772602	72773442	PR-chr10-27560	16.981
chr15	50735807	50736415	PR-chr15-12908	16.978
chr4	77863964	77864711	PR-chr4-27697	16.975
chr5	75044561	75045262	PR-chr5-27568	16.972
chr14	102232980	102233539	PR-chr14-35636	16.962
chr10	97224003	97224587	PR-chr10-38067	16.958
chr1	112727376	112727975	PR-chr1-36197	16.955
chr13	73752216	73752877	PR-chr13-21222	16.951
chrX	109084737	109085306	PR-chrX-30719	16.951
chr7	94168446	94169154	PR-chr7-41092	16.949
chr17	73706383	73706963	PR-chr17-32091	16.944
chr1	149630228	149630840	PR-chr1-42398	16.943
chr9	35357436	35358152	PR-chr9-13910	16.938
chr11	6228722	6229341	PR-chr11-2209	16.938
chr16	88004402	88005119	PR-chr16-34012	16.935
chr13	99320822	99322471	PR-chr13-31131	16.934
chr1	142739873	142740757	PR-chr1-40096	16.934
chr18	36930259	36930951	PR-chr18-16711	16.929
chr3	121890876	121891751	PR-chr3-45349	16.915
chr3	189117573	189118147	PR-chr3-71821	16.909
chr3	189466493	189468230	PR-chr3-72014	16.909
chr9	109903938	109905261	PR-chr9-31833	16.909
chr17	67422398	67423675	PR-chr17-28215	16.907
chr12	108790448	108791066	PR-chr12-48335	16.906
chr16	27092576	27093225	PR-chr16-12305	16.902
chr18	11966522	11967104	PR-chr18-5689	16.897
chr9	698210	699558	PR-chr9-256	16.886
chr15	84359200	84359790	PR-chr15-28398	16.885
chr7	112879401	112880007	PR-chr7-48255	16.86
chr13	32324611	32325214	PR-chr13-5150	16.847
chr7	12721394	12723491	PR-chr7-6708	16.846
chr5	71083263	71083957	PR-chr5-25816	16.822
chr3	172766116	172767141	PR-chr3-65159	16.82
chr13	51107873	51108908	PR-chr13-12842	16.783
chr8	31090200	31091178	PR-chr8-12892	16.781
chrX	11295337	11296546	PR-chrX-3912	16.758
chr18	44111816	44112425	PR-chr18-20535	16.754
chr2	109452854	109454036	PR-chr2-42850	16.754
chr12	102827651	102828238	PR-chr12-45860	16.75
chr5	148326015	148326929	PR-chr5-56684	16.748
chr1	117934056	117935946	PR-chr1-38570	16.739
chr19	1983207	1984134	PR-chr19-801	16.738
chr5	81554090	81554914	PR-chr5-30249	16.738
chr4	122366186	122367469	PR-chr4-44376	16.722
chr5	37144647	37145250	PR-chr5-14575	16.694
chr4	119887056	119887785	PR-chr4-43389	16.685
chr17	76645386	76646410	PR-chr17-33864	16.658
chr7	21605242	21606363	PR-chr7-11722	16.647
chr3	151468972	151469686	PR-chr3-57164	16.644
chr1	213354274	213356885	PR-chr1-77570	16.639
chr2	223368933	223370076	PR-chr2-87854	16.605
chr2	14299974	14300859	PR-chr2-6424	16.585
chr3	156349566	156350536	PR-chr3-59070	16.564
chr10	77516754	77517305	PR-chr10-29794	16.551
chr18	36909252	36910605	PR-chr18-16699	16.525
chr4	5166921	5167670	PR-chr4-2193	16.519
chr2	209941367	209943090	PR-chr2-81783	16.513
chr5	36486323	36486907	PR-chr5-14326	16.511
chr5	141181290	141183055	PR-chr5-53645	16.476
chr17	72617157	72618109	PR-chr17-31404	16.471
chrX	129258298	129258896	PR-chrX-36808	16.462
chr1	110636454	110637402	PR-chr1-35299	16.456
chrX	11286867	11287580	PR-chrX-3910	16.449
chr8	86922545	86923744	PR-chr8-36017	16.443
chr17	2538219	2539116	PR-chr17-831	16.442
chr12	61599276	61600408	PR-chr12-28566	16.434
chr8	106507448	106508000	PR-chr8-45003	16.379
chr1	43269785	43270678	PR-chr1-15340	16.373
chr11	66267134	66268038	PR-chr11-23192	16.37
chr10	32689135	32689762	PR-chr10-13773	16.368
chr3	85007165	85007726	PR-chr3-33189	16.337
chr4	117817410	117818063	PR-chr4-42736	16.326
chr22	43529613	43530933	PR-chr22-12646	16.308
chr9	90657271	90658330	PR-chr9-24232	16.307
chr3	130852709	130853324	PR-chr3-49077	16.306
chr4	75423925	75424935	PR-chr4-26755	16.29
chr16	52156797	52157552	PR-chr16-17757	16.278
chr1	212679409	212681529	PR-chr1-77154	16.267
chr4	111054880	111055744	PR-chr4-40201	16.259
chr17	65062795	65063489	PR-chr17-26848	16.203
chr22	28111380	28113477	PR-chr22-6320	16.203
chr4	49207422	49208697	PR-chr4-19118	16.197
chr4	24415273	24416343	PR-chr4-10100	16.189
chr19	52500378	52501026	PR-chr19-15782	16.174
chr9	14273133	14274194	PR-chr9-5738	16.165
chr7	120156472	120157500	PR-chr7-51067	16.153
chr9	116185514	116186143	PR-chr9-34523	16.143
chr14	85122896	85124204	PR-chr14-26694	16.14
chr1	120126483	120127160	PR-chr1-39530	16.12
chr2	169203857	169204864	PR-chr2-65639	16.102
chr10	76251308	76252044	PR-chr10-29099	16.088
chr9	96833840	96835323	PR-chr9-26733	16.053
chr13	33807465	33808220	PR-chr13-5789	16
chr13	41582400	41583259	PR-chr13-8920	16
chr13	87639864	87640511	PR-chr13-26382	16
chr14	60662202	60662750	PR-chr14-15796	16
chr16	14089797	14090368	PR-chr16-7373	16
chr18	72163786	72164341	PR-chr18-34634	16
chr1	8053469	8054066	PR-chr1-3032	16
chr1	10236217	10237226	PR-chr1-3731	16
chr1	98571465	98572137	PR-chr1-32082	16
chr1	110193493	110194081	PR-chr1-35048	16
chr1	153451940	153452488	PR-chr1-44528	16
chr20	14693001	14694069	PR-chr20-4743	16
chr20	36609989	36610810	PR-chr20-12689	16
chr2	137807396	137807965	PR-chr2-52873	16
chr5	71034085	71035666	PR-chr5-25793	16
chr5	148849466	148850023	PR-chr5-56938	16
chr7	11456287	11457470	PR-chr7-6036	16
chr7	91078848	91079602	PR-chr7-39775	16
chr7	128922817	128923545	PR-chr7-54497	16
chr7	142503180	142503704	PR-chr7-60280	16
chr8	98347548	98348182	PR-chr8-41213	16
chr9	109982428	109983011	PR-chr9-31874	16
chr19	2719719	2720331	PR-chr19-1077	16
chr1	22495955	22497065	PR-chr1-8169	16
chr2	129578034	129579031	PR-chr2-49943	16
chr9	35686743	35687840	PR-chr9-14052	16
chr17	2810185	2811220	PR-chr17-932	15.999
chr1	35771179	35771750	PR-chr1-12725	15.999
chr5	171892710	171893829	PR-chr5-67209	15.999
chr20	23028872	23029786	PR-chr20-8037	15.998
chr2	46728789	46729333	PR-chr2-20202	15.998
chr3	179093701	179094143	PR-chr3-67723	15.998
chr12	108741023	108741810	PR-chr12-48310	15.998
chr15	19954675	19955271	PR-chr15-379	15.998
chr12	32577283	32578805	PR-chr12-17182	15.997
chr9	14316196	14316730	PR-chr9-5775	15.997
chr13	107331585	107332726	PR-chr13-34741	15.996
chr2	162809427	162810722	PR-chr2-62965	15.995
chr5	35263246	35264156	PR-chr5-13856	15.995
chr1	160443377	160444848	PR-chr1-48020	15.994
chr8	72396606	72397679	PR-chr8-29676	15.992
chr11	9718025	9718657	PR-chr11-3615	15.99
chr22	35134805	35135430	PR-chr22-9903	15.99
chr17	74527776	74528503	PR-chr17-32608	15.989
chr12	88424983	88425940	PR-chr12-40173	15.982
chr1	84857449	84858148	PR-chr1-27882	15.981
chr1	227033296	227033876	PR-chr1-85814	15.981
chr18	44467247	44467836	PR-chr18-20738	15.978
chr9	117446362	117446920	PR-chr9-35088	15.978
chr14	73374408	73375132	PR-chr14-21131	15.977
chr2	216765723	216766438	PR-chr2-84721	15.969
chr5	66580157	66580735	PR-chr5-24697	15.969
chr9	121670709	121671238	PR-chr9-36856	15.961
chr10	3346789	3347399	PR-chr10-1607	15.961
chr2	209572742	209573341	PR-chr2-81666	15.957
chr4	37130866	37131860	PR-chr4-14718	15.955
chr13	95009322	95009906	PR-chr13-29273	15.952
chr16	66343857	66344570	PR-chr16-23940	15.949
chr5	138841302	138842658	PR-chr5-52599	15.939
chr4	15751632	15752174	PR-chr4-6582	15.938
chr7	139395035	139396372	PR-chr7-58948	15.934
chr6	169057765	169058525	PR-chr6-56656	15.927
chr2	215644589	215645614	PR-chr2-84224	15.926
chr8	55457070	55457776	PR-chr8-21855	15.924
chr12	48667614	48668476	PR-chr12-22986	15.92
chr20	23563739	23564341	PR-chr20-8283	15.919
chr5	148495072	148495824	PR-chr5-56765	15.918
chr15	58472080	58472964	PR-chr15-16312	15.915
chr8	134000267	134001272	PR-chr8-57999	15.913
chr7	151038739	151039634	PR-chr7-63407	15.906
chr4	186146781	186147469	PR-chr4-68290	15.903
chr8	134428085	134428593	PR-chr8-58263	15.897
chr4	129369083	129369778	PR-chr4-46897	15.891
chr12	10668231	10669148	PR-chr12-5953	15.89
chr8	133958174	133959301	PR-chr8-57966	15.889
chr12	70397587	70398249	PR-chr12-33396	15.882
chr19	14468800	14469582	PR-chr19-4803	15.854
chr2	191040870	191041506	PR-chr2-74284	15.846
chr3	141796681	141797296	PR-chr3-53459	15.839
chr13	32684974	32686458	PR-chr13-5305	15.834
chr5	82849805	82850409	PR-chr5-30794	15.829
chr4	90385383	90386070	PR-chr4-32595	15.824
chr7	106661503	106662124	PR-chr7-45841	15.812
chr9	74938523	74939354	PR-chr9-18040	15.801
chr11	66551367	66552827	PR-chr11-23346	15.792
chr3	27592641	27593313	PR-chr3-11148	15.783
chr1	6868325	6868886	PR-chr1-2549	15.772
chr16	20506305	20507733	PR-chr16-9596	15.768
chr10	29755184	29755894	PR-chr10-12617	15.764
chr10	76557025	76557897	PR-chr10-29265	15.762
chr4	57793715	57795644	PR-chr4-21246	15.761
chr14	97254672	97255243	PR-chr14-32924	15.755
chr10	35260218	35260848	PR-chr10-14864	15.745
chr8	33042043	33042809	PR-chr8-13829	15.738
chr1	61379949	61380399	PR-chr1-21016	15.737
chr3	66625578	66626197	PR-chr3-26232	15.719
chr17	65068319	65069143	PR-chr17-26852	15.715
chr13	80798938	80799622	PR-chr13-24104	15.712
chr11	34981718	34982283	PR-chr11-13808	15.707
chr4	157755554	157756064	PR-chr4-57476	15.702
chr14	69292185	69293669	PR-chr14-19460	15.682
chr6	31074339	31074987	PR-chr6-12103	15.68
chr6	138139479	138140515	PR-chr6-46416	15.666
chr14	78949151	78950138	PR-chr14-23743	15.665
chr22	18377375	18378932	PR-chr22-1526	15.663
chr5	141333860	141334536	PR-chr5-53729	15.662
chr1	36426185	36426780	PR-chr1-13013	15.655
chr9	109306505	109307104	PR-chr9-31544	15.64
chr6	157190137	157190804	PR-chr6-52357	15.638
chr2	45902078	45905173	PR-chr2-19783	15.605
chr16	14468008	14469529	PR-chr16-7560	15.603
chr3	103276329	103276902	PR-chr3-38110	15.598
chr18	17117459	17118046	PR-chr18-7116	15.59
chr2	134147460	134149519	PR-chr2-51417	15.555
chr3	23975690	23976751	PR-chr3-9673	15.553
chr4	120191148	120191649	PR-chr4-43537	15.519
chr13	41252745	41254680	PR-chr13-8788	15.511
chr8	102574899	102577003	PR-chr8-43136	15.501
chr5	1368373	1370368	PR-chr5-603	15.496
chrX	66822339	66823152	PR-chrX-20526	15.49
chr3	15364871	15365488	PR-chr3-6426	15.456
chr1	149819795	149821896	PR-chr1-42513	15.449
chr17	57606070	57606701	PR-chr17-22847	15.441
chr13	75234505	75235521	PR-chr13-21828	15.425
chr11	33694347	33695027	PR-chr11-13226	15.423
chr19	38159783	38160555	PR-chr19-10287	15.392
chr17	68240197	68241058	PR-chr17-28763	15.39
chr20	45380740	45381598	PR-chr20-17399	15.38
chr20	44461382	44462681	PR-chr20-16912	15.378
chr21	37140641	37141665	PR-chr21-7171	15.374
chr17	43689792	43691778	PR-chr17-15545	15.356
chr13	94721316	94722562	PR-chr13-29174	15.345
chr8	116862033	116862670	PR-chr8-49583	15.327
chr14	64147638	64148282	PR-chr14-17200	15.317
chr7	137289097	137289722	PR-chr7-58145	15.284
chr11	122906357	122907718	PR-chr11-44026	15.249
chr1	179875923	179878125	PR-chr1-58472	15.232
chr18	11793621	11794386	PR-chr18-5607	15.217
chr1	212659276	212661107	PR-chr1-77142	15.215
chr12	62525742	62527307	PR-chr12-28884	15.214
chr3	9976928	9978008	PR-chr3-4089	15.16
chr2	226372203	226372839	PR-chr2-89132	15.115
chr7	111177342	111178277	PR-chr7-47537	15.103
chr1	196017535	196018798	PR-chr1-66772	15.088
chr20	32078753	32079573	PR-chr20-10603	15.082
chr3	40955664	40956387	PR-chr3-16019	15.03
chr16	69286883	69287563	PR-chr16-25303	15.028
chrX	143627385	143627963	PR-chrX-41621	15.019
chrX	20030198	20030895	PR-chrX-7614	15.009
chr9	111689908	111690565	PR-chr9-32670	15.005
chr11	107910316	107910883	PR-chr11-38151	15
chr11	110685795	110686563	PR-chr11-39081	15
chr12	61727199	61727852	PR-chr12-28620	15
chr12	90948449	90949002	PR-chr12-41226	15
chr16	10972776	10973353	PR-chr16-5836	15
chr16	54962042	54963069	PR-chr16-19065	15
chr1	29095476	29096173	PR-chr1-10490	15
chr1	150289765	150291046	PR-chr1-42773	15
chr1	168332799	168333814	PR-chr1-52237	15
chr1	224405203	224405876	PR-chr1-84320	15
chr20	47470186	47470843	PR-chr20-18492	15
chr22	16430912	16431783	PR-chr22-551	15
chr22	29919019	29919680	PR-chr22-7296	15
chr2	32564319	32564892	PR-chr2-14278	15
chr2	37883702	37884516	PR-chr2-16325	15
chr2	46118836	46119356	PR-chr2-19905	15
chr5	167725095	167726007	PR-chr5-65233	15
chr6	90095673	90096606	PR-chr6-31442	15
chr7	20135944	20136459	PR-chr7-10879	15
chr7	69682165	69682767	PR-chr7-32462	15
chr8	81144462	81144991	PR-chr8-33628	15
chr8	92706437	92707233	PR-chr8-38430	15
chr9	85491802	85492339	PR-chr9-22184	15
chr7	71315641	71316468	PR-chr7-33040	15
chr19	2714387	2715024	PR-chr19-1073	15
chr1	18869168	18870797	PR-chr1-6765	14.999
chr1	85068090	85068790	PR-chr1-27965	14.999
chr4	144604077	144604658	PR-chr4-52237	14.999
chr16	14093800	14094444	PR-chr16-7376	14.998
chr10	119866266	119867318	PR-chr10-49000	14.998
chr17	62848481	62849114	PR-chr17-25721	14.997
chr20	39205185	39206113	PR-chr20-14151	14.997
chr17	44232783	44234072	PR-chr17-15890	14.996
chr10	71621821	71622525	PR-chr10-26988	14.995
chr15	37908066	37908665	PR-chr15-7215	14.994
chr9	83392779	83395263	PR-chr9-21310	14.992
chr3	171149076	171149961	PR-chr3-64492	14.99
chr18	29636414	29637393	PR-chr18-13069	14.989
chr4	40838805	40839451	PR-chr4-16165	14.989
chr14	34929681	34930301	PR-chr14-6284	14.987
chr10	95810484	95811255	PR-chr10-37574	14.982
chr9	118378453	118379326	PR-chr9-35490	14.982
chr1	229296999	229298733	PR-chr1-87236	14.981
chr9	89178472	89179076	PR-chr9-23651	14.981
chr9	103280846	103281415	PR-chr9-29311	14.981
chr12	66532256	66534309	PR-chr12-31196	14.977
chr2	109744535	109745153	PR-chr2-42924	14.975
chr17	14292652	14293402	PR-chr17-4664	14.973
chr1	109167889	109168773	PR-chr1-34642	14.972
chr7	113443290	113444025	PR-chr7-48428	14.969
chr6	91135252	91135842	PR-chr6-31870	14.967
chr2	24091795	24092451	PR-chr2-10682	14.961
chr2	189923371	189923962	PR-chr2-73882	14.959
chr20	39711675	39713091	PR-chr20-14443	14.955
chr12	129690328	129690972	PR-chr12-56978	14.952
chr11	44831981	44833092	PR-chr11-17533	14.951
chr4	53476554	53477246	PR-chr4-19531	14.947
chr5	151646306	151646952	PR-chr5-58228	14.946
chr5	66514054	66514619	PR-chr5-24661	14.939
chr8	93453723	93454557	PR-chr8-38763	14.934
chr12	68232955	68234395	PR-chr12-32153	14.92
chr20	43580228	43580876	PR-chr20-16454	14.918
chr4	119890026	119890737	PR-chr4-43392	14.915
chr21	39200780	39201410	PR-chr21-7896	14.909
chr8	133303758	133304493	PR-chr8-57645	14.907
chr19	48646416	48647017	PR-chr19-14288	14.891
chr10	86718993	86719542	PR-chr10-33759	14.89
chr5	147758045	147759354	PR-chr5-56417	14.884
chr19	52727239	52727873	PR-chr19-15862	14.879
chr13	32590398	32591615	PR-chr13-5262	14.873
chr16	67845030	67845640	PR-chr16-24740	14.873
chr7	156771351	156772401	PR-chr7-65713	14.872
chr4	40672033	40672702	PR-chr4-16098	14.87
chr11	47952210	47952965	PR-chr11-18902	14.864
chr3	109188416	109189326	PR-chr3-40240	14.862
chr11	104844017	104844572	PR-chr11-37188	14.856
chr1	208659213	208659813	PR-chr1-74721	14.849
chr5	148993779	148994472	PR-chr5-57005	14.826
chr9	116346454	116347018	PR-chr9-34604	14.825
chr11	80171220	80171909	PR-chr11-29265	14.813
chr20	30337096	30337684	PR-chr20-9740	14.81
chr9	14169184	14169977	PR-chr9-5679	14.809
chr11	113271123	113271848	PR-chr11-40172	14.802
chr17	65566571	65567240	PR-chr17-27116	14.78
chr7	96267711	96268728	PR-chr7-41893	14.748
chr1	116515198	116515752	PR-chr1-37710	14.747
chr11	129400335	129400934	PR-chr11-46593	14.743
chr12	113477401	113478194	PR-chr12-50204	14.743
chr1	109495223	109496741	PR-chr1-34736	14.734
chr3	123112195	123112697	PR-chr3-45682	14.727
chrX	17514014	17514850	PR-chrX-6561	14.725
chr8	69806488	69807067	PR-chr8-28490	14.715
chr15	98312101	98312706	PR-chr15-35154	14.686
chr8	30461870	30462548	PR-chr8-12659	14.684
chr2	129614259	129614818	PR-chr2-49947	14.667
chr10	67341118	67341761	PR-chr10-25162	14.663
chr18	54873003	54873699	PR-chr18-26208	14.663
chr3	24303595	24305188	PR-chr3-9816	14.658
chr8	110688393	110690299	PR-chr8-47033	14.656
chr1	179354929	179355633	PR-chr1-58139	14.651
chr2	44250267	44251510	PR-chr2-19059	14.648
chr10	112586839	112587673	PR-chr10-45330	14.635
chr21	31218222	31218880	PR-chr21-5015	14.634
chr5	92396468	92397652	PR-chr5-34505	14.63
chr9	114588946	114589817	PR-chr9-33821	14.628
chr18	65477045	65478159	PR-chr18-31291	14.62
chr5	17048018	17048609	PR-chr5-7676	14.618
chr8	56661525	56662587	PR-chr8-22441	14.603
chr4	139538873	139539503	PR-chr4-50189	14.591
chr5	43468459	43469657	PR-chr5-17036	14.588
chr9	109889800	109890447	PR-chr9-31824	14.588
chr3	185187129	185188125	PR-chr3-70154	14.573
chr5	57424833	57426570	PR-chr5-21005	14.571
chr1	181204587	181205703	PR-chr1-59276	14.564
chr6	7424427	7425738	PR-chr6-3072	14.546
chr19	34087271	34088156	PR-chr19-8337	14.543
chrX	22063133	22063880	PR-chrX-8365	14.54
chr1	112806451	112806980	PR-chr1-36235	14.539
chr10	105701594	105702504	PR-chr10-42169	14.526
chr17	68732434	68733581	PR-chr17-29049	14.519
chr5	72876038	72876923	PR-chr5-26638	14.494
chr14	24521233	24521988	PR-chr14-2275	14.478
chr5	10363302	10363924	PR-chr5-4846	14.471
chr8	143881344	143883080	PR-chr8-63222	14.44
chr22	29933097	29933882	PR-chr22-7306	14.423
chr22	31796559	31797079	PR-chr22-8242	14.407
chr12	5164924	5165514	PR-chr12-3231	14.388
chr2	208418036	208418539	PR-chr2-81266	14.388
chr2	144025922	144026502	PR-chr2-55302	14.357
chr17	72632807	72633804	PR-chr17-31414	14.35
chr15	85867839	85868569	PR-chr15-29051	14.347
chr3	102978313	102979111	PR-chr3-37992	14.32
chr7	21134468	21135063	PR-chr7-11494	14.304
chr20	31702646	31703281	PR-chr20-10416	14.28
chr11	130080825	130081747	PR-chr11-46875	14.252
chr15	81378822	81379679	PR-chr15-27108	14.247
chr7	17702264	17702913	PR-chr7-9503	14.233
chr4	128185653	128186895	PR-chr4-46519	14.219
chr4	137774278	137775136	PR-chr4-49551	14.199
chr12	43515503	43516618	PR-chr12-20980	14.198
chr1	153150701	153151750	PR-chr1-44342	14.141
chr9	2467541	2468176	PR-chr9-1026	14.137
chr5	31478007	31478753	PR-chr5-12387	14.131
chr3	120396690	120397283	PR-chr3-44754	14.119
chr22	25141800	25143172	PR-chr22-4730	14.111
chr7	21586084	21586882	PR-chr7-11711	14.11
chr20	49784753	49785354	PR-chr20-19799	14.105
chr8	102664849	102665810	PR-chr8-43191	14.104
chr9	113852588	113853220	PR-chr9-33561	14.043
chr1	209583960	209584621	PR-chr1-75257	14.029
chr10	90622454	90623084	PR-chr10-35401	14.022
chr18	62541779	62543455	PR-chr18-29975	14.016
chr12	105794254	105795240	PR-chr12-47085	14.007
chr22	32590750	32591826	PR-chr22-8672	14.006
chr10	48104393	48105035	PR-chr10-17773	14
chr12	49954811	49955333	PR-chr12-23441	14
chr12	73855907	73856493	PR-chr12-34866	14
chr12	103085265	103085910	PR-chr12-45964	14
chr16	20623024	20623588	PR-chr16-9631	14
chr16	28505147	28505740	PR-chr16-12892	14
chr16	84171029	84171607	PR-chr16-32066	14
chr17	45028398	45029837	PR-chr17-16306	14
chr18	27816810	27817386	PR-chr18-12230	14
chr1	78242883	78243406	PR-chr1-25956	14
chr1	181493665	181494263	PR-chr1-59460	14
chr2	9296598	9297194	PR-chr2-4272	14
chr3	151669799	151670473	PR-chr3-57281	14
chr4	1677683	1678185	PR-chr4-692	14
chr4	15689042	15690596	PR-chr4-6552	14
chr5	59718435	59719115	PR-chr5-22060	14
chr6	17267421	17268007	PR-chr6-7060	14
chr6	106356431	106357033	PR-chr6-36944	14
chr7	6409305	6410568	PR-chr7-3469	14
chr7	47763553	47764481	PR-chr7-26536	14
chr7	75583155	75583761	PR-chr7-33937	14
chr8	26576587	26577158	PR-chr8-10897	14
chr8	38290554	38291542	PR-chr8-16434	14
chr8	128933903	128934633	PR-chr8-55493	14
chr9	3688025	3688610	PR-chr9-1518	14
chrX	9397748	9398918	PR-chrX-2971	14
chrX	43151796	43152474	PR-chrX-15931	14
chrX	120010894	120011702	PR-chrX-34121	14
chr2	42609924	42610439	PR-chr2-18333	14
chr16	55201546	55202245	PR-chr16-19150	13.999
chr4	14056963	14057716	PR-chr4-5888	13.999
chr8	102359070	102360045	PR-chr8-43016	13.999
chr17	43338081	43338657	PR-chr17-15315	13.999
chr5	95258018	95258750	PR-chr5-35721	13.998
chr9	4829112	4829858	PR-chr9-2037	13.998
chr10	61421319	61421861	PR-chr10-22527	13.997
chr12	75091599	75092144	PR-chr12-35269	13.997
chr20	9201164	9201757	PR-chr20-2768	13.996
chr17	13097673	13098937	PR-chr17-4263	13.995
chr1	155368831	155369586	PR-chr1-45593	13.993
chr20	29731258	29732228	PR-chr20-9468	13.991
chr4	102295292	102296616	PR-chr4-37010	13.985
chr5	108819125	108819721	PR-chr5-40706	13.983
chr15	31214704	31215475	PR-chr15-3948	13.982
chr1	52907801	52908376	PR-chr1-18338	13.98
chr11	100056929	100057479	PR-chr11-35629	13.977
chr13	109094575	109095156	PR-chr13-35469	13.977
chr16	78230870	78231674	PR-chr16-29291	13.977
chr11	15640266	15640855	PR-chr11-6086	13.975
chr5	125995229	125995774	PR-chr5-47364	13.974
chr1	204423071	204424876	PR-chr1-72054	13.974
chr10	4694961	4696298	PR-chr10-2277	13.972
chr17	52962006	52963562	PR-chr17-20510	13.971
chr2	85529770	85530373	PR-chr2-35552	13.969
chr19	50938012	50938657	PR-chr19-15168	13.966
chr19	15275759	15276696	PR-chr19-5066	13.965
chr21	43830204	43831066	PR-chr21-9570	13.959
chrX	7570977	7571761	PR-chrX-2084	13.958
chr12	123269955	123270537	PR-chr12-54185	13.955
chr12	44837245	44837847	PR-chr12-21427	13.949
chr3	189483145	189484241	PR-chr3-72022	13.942
chr3	184965527	184966405	PR-chr3-70045	13.941
chr12	6832867	6833569	PR-chr12-4300	13.938
chr12	55405225	55405862	PR-chr12-26011	13.937
chr10	90207239	90208632	PR-chr10-35193	13.926
chr9	74573922	74574943	PR-chr9-17872	13.926
chr8	102558519	102559196	PR-chr8-43130	13.922
chr20	46041235	46042162	PR-chr20-17735	13.92
chr2	10011608	10012362	PR-chr2-4613	13.912
chr12	62800382	62800961	PR-chr12-29070	13.899
chr8	133968647	133969195	PR-chr8-57974	13.899
chr1	235094683	235095606	PR-chr1-90889	13.894
chr4	80738873	80739457	PR-chr4-28863	13.887
chr13	75115363	75116855	PR-chr13-21777	13.884
chr7	124650976	124651727	PR-chr7-52783	13.879
chrX	18538070	18538800	PR-chrX-6980	13.87
chr3	189008978	189009986	PR-chr3-71770	13.863
chr18	11845936	11847960	PR-chr18-5637	13.862
chr16	69285005	69286571	PR-chr16-25302	13.86
chr4	75201699	75202270	PR-chr4-26669	13.86
chr3	134650049	134650621	PR-chr3-50538	13.857
chr6	101972216	101972941	PR-chr6-35552	13.847
chr3	5150539	5151110	PR-chr3-2162	13.846
chr20	10473542	10474137	PR-chr20-3264	13.843
chr13	49946230	49947098	PR-chr13-12335	13.83
chr17	25714842	25715653	PR-chr17-8237	13.829
chr1	61576669	61577419	PR-chr1-21118	13.822
chr4	17128225	17128889	PR-chr4-7152	13.82
chr22	19080769	19081342	PR-chr22-1788	13.815
chr14	32206647	32207198	PR-chr14-5161	13.81
chr11	100712180	100713200	PR-chr11-35863	13.799
chr7	103371724	103372977	PR-chr7-44514	13.78
chr12	94637816	94638615	PR-chr12-42677	13.762
chr2	101097175	101098061	PR-chr2-39400	13.759
chr9	72254051	72254831	PR-chr9-16889	13.737
chr14	33590899	33591438	PR-chr14-5847	13.732
chr5	23454800	23455362	PR-chr5-9844	13.719
chr9	33743301	33744026	PR-chr9-13293	13.719
chrX	65127213	65128322	PR-chrX-20176	13.717
chr2	87684517	87685080	PR-chr2-36225	13.711
chr10	71657614	71658911	PR-chr10-27000	13.687
chr8	33290054	33292528	PR-chr8-13962	13.68
chr11	34801226	34801728	PR-chr11-13736	13.679
chr18	8605371	8606090	PR-chr18-4028	13.664
chr2	238022724	238023311	PR-chr2-94224	13.664
chr7	13023594	13024162	PR-chr7-6885	13.644
chrX	39968665	39969428	PR-chrX-14910	13.644
chr3	158334814	158336612	PR-chr3-59892	13.636
chr5	161228874	161229613	PR-chr5-62309	13.617
chr15	58465276	58466409	PR-chr15-16307	13.61
chr7	75575620	75576343	PR-chr7-33935	13.608
chr12	54971346	54971933	PR-chr12-25851	13.605
chr12	40940389	40941070	PR-chr12-19966	13.6
chr10	107857529	107858080	PR-chr10-43194	13.593
chr8	118312926	118313987	PR-chr8-50350	13.589
chr4	73293117	73293729	PR-chr4-25993	13.576
chr3	39196983	39197724	PR-chr3-15415	13.568
chr18	72269306	72269755	PR-chr18-34714	13.519
chr1	222094348	222095291	PR-chr1-83071	13.519
chrX	148776756	148777648	PR-chrX-43140	13.505
chr1	219727576	219728667	PR-chr1-81625	13.467
chrX	106829938	106830547	PR-chrX-29978	13.464
chr6	138945298	138945839	PR-chr6-46716	13.447
chr7	101371725	101372573	PR-chr7-43838	13.446
chr2	88171198	88171803	PR-chr2-36288	13.443
chr8	47825595	47826115	PR-chr8-18742	13.44
chr2	23313	23977	PR-chr2-6	13.415
chr19	34123317	34124061	PR-chr19-8357	13.387
chr1	168685410	168685982	PR-chr1-52400	13.375
chr7	29455717	29456425	PR-chr7-16571	13.354
chr3	150739794	150740285	PR-chr3-56840	13.347
chr9	133905317	133906213	PR-chr9-42294	13.336
chrX	10474518	10475160	PR-chrX-3521	13.329
chr13	19978116	19979129	PR-chr13-461	13.317
chr8	25157064	25158037	PR-chr8-10237	13.307
chr15	43739366	43740499	PR-chr15-9815	13.304
chr3	24523864	24524630	PR-chr3-9918	13.299
chr18	30763004	30763752	PR-chr18-13590	13.266
chr1	30663142	30664960	PR-chr1-11043	13.266
chr1	150272817	150274733	PR-chr1-42762	13.264
chr16	86599982	86601394	PR-chr16-33270	13.256
chr20	13028212	13029057	PR-chr20-4176	13.256
chr20	3698226	3699322	PR-chr20-1059	13.252
chr10	103381554	103382465	PR-chr10-41028	13.239
chr17	51605971	51609497	PR-chr17-19684	13.208
chr7	40443180	40445152	PR-chr7-22850	13.205
chr5	9160533	9161343	PR-chr5-4313	13.197
chr9	90769893	90770717	PR-chr9-24274	13.162
chr8	134530625	134531266	PR-chr8-58325	13.156
chr1	202722813	202723477	PR-chr1-71012	13.133
chr4	188092725	188093730	PR-chr4-69191	13.125
chr18	23756677	23757551	PR-chr18-10424	13.116
chr2	28546420	28547426	PR-chr2-12579	13.091
chr18	18319647	18320217	PR-chr18-7698	13.083
chr17	5721889	5722478	PR-chr17-1831	13.068
chr2	28709980	28711171	PR-chr2-12679	13.065
chr11	95292190	95292837	PR-chr11-34218	13.031
chr2	24511783	24513186	PR-chr2-10835	13.025
chr16	69288022	69290686	PR-chr16-25304	13.005
chr10	4709858	4710717	PR-chr10-2282	13
chr12	44888358	44889065	PR-chr12-21457	13
chr13	32730683	32731709	PR-chr13-5334	13
chr14	73104258	73104850	PR-chr14-21036	13
chr14	93615390	93616310	PR-chr14-30906	13
chr16	45636661	45637228	PR-chr16-15050	13
chr16	79208450	79209199	PR-chr16-29775	13
chr16	84531129	84532062	PR-chr16-32255	13
chr18	50583324	50583915	PR-chr18-23761	13
chr1	42550738	42551259	PR-chr1-15105	13
chr1	101242133	101242957	PR-chr1-32841	13
chr1	158086819	158087452	PR-chr1-46843	13
chr1	206686846	206687441	PR-chr1-73476	13
chr1	215602939	215603524	PR-chr1-79059	13
chr20	9191099	9191747	PR-chr20-2762	13
chr20	54930786	54931474	PR-chr20-22375	13
chr21	28938960	28939493	PR-chr21-4279	13
chr2	194831730	194832791	PR-chr2-75723	13
chr2	227066642	227067236	PR-chr2-89395	13
chr2	227100870	227101669	PR-chr2-89413	13
chr2	231067879	231068521	PR-chr2-91059	13
chr3	112799937	112801120	PR-chr3-41478	13
chr3	180621809	180622388	PR-chr3-68304	13
chr4	146820054	146820630	PR-chr4-52943	13
chr4	169579412	169580544	PR-chr4-61755	13
chr5	148338672	148339268	PR-chr5-56691	13
chr6	91295233	91295783	PR-chr6-31930	13
chr6	126404643	126405291	PR-chr6-42575	13
chr6	138155311	138155946	PR-chr6-46422	13
chr7	36134304	36135182	PR-chr7-20323	13
chr7	76043431	76044032	PR-chr7-34063	13
chr8	41991065	41992958	PR-chr8-18005	13
chr9	35834306	35834920	PR-chr9-14150	13
chr9	84743057	84743778	PR-chr9-21861	13
chr17	54899016	54899918	PR-chr17-21580	13
chr1	232766536	232768185	PR-chr1-89398	13
chr2	62531305	62531814	PR-chr2-26501	13
chr9	129560787	129561344	PR-chr9-40378	13
chr7	18672832	18674219	PR-chr7-10125	13
chr10	122841710	122842361	PR-chr10-50436	12.999
chr19	1724202	1724779	PR-chr19-700	12.999
chr2	50202017	50202661	PR-chr2-21621	12.999
chr2	218806409	218807028	PR-chr2-85733	12.999
chr5	146457954	146458722	PR-chr5-55890	12.999
chr8	9343453	9344076	PR-chr8-3694	12.999
chr9	111393299	111394213	PR-chr9-32518	12.999
chrX	133532081	133533337	PR-chrX-38448	12.999
chr14	71940554	71941424	PR-chr14-20534	12.999
chr16	67890084	67890689	PR-chr16-24753	12.998
chr21	39081297	39081865	PR-chr21-7865	12.998
chr8	146201222	146203161	PR-chr8-64315	12.998
chr16	24723351	24724062	PR-chr16-11274	12.997
chr1	47268993	47269767	PR-chr1-16624	12.997
chr11	35066549	35067449	PR-chr11-13845	12.995
chr2	200743095	200743700	PR-chr2-78049	12.995
chr14	68629344	68630606	PR-chr14-19133	12.993
chr16	70185220	70185799	PR-chr16-25795	12.993
chr5	95003248	95003798	PR-chr5-35586	12.992
chr2	65381588	65382418	PR-chr2-27596	12.99
chr2	121671240	121672019	PR-chr2-47066	12.988
chr9	122559633	122560200	PR-chr9-37274	12.985
chr9	131282665	131283488	PR-chr9-41115	12.984
chr12	14581532	14582148	PR-chr12-8026	12.982
chr8	25321438	25322355	PR-chr8-10323	12.98
chr8	102527182	102527596	PR-chr8-43111	12.98
chr4	139490267	139491014	PR-chr4-50176	12.979
chr11	86393805	86394686	PR-chr11-31375	12.977
chr4	170463238	170464315	PR-chr4-62160	12.977
chr4	14477133	14477755	PR-chr4-6039	12.976
chr18	19446217	19447129	PR-chr18-8240	12.973
chr21	38433440	38434464	PR-chr21-7609	12.973
chr3	170468746	170469291	PR-chr3-64135	12.971
chr6	23692059	23692962	PR-chr6-9482	12.967
chr8	29651790	29652383	PR-chr8-12286	12.966
chrX	54739114	54739765	PR-chrX-19049	12.965
chr17	73275553	73276362	PR-chr17-31816	12.961
chr19	45919889	45920651	PR-chr19-13240	12.961
chr4	38715697	38716633	PR-chr4-15397	12.957
chr14	74686436	74687108	PR-chr14-21727	12.953
chr12	6244097	6244703	PR-chr12-3929	12.951
chr13	47294045	47294753	PR-chr13-11367	12.948
chrX	13059821	13060497	PR-chrX-4714	12.948
chr4	186056424	186057929	PR-chr4-68260	12.945
chr14	49201522	49202301	PR-chr14-11111	12.939
chr20	15225049	15226115	PR-chr20-4960	12.938
chr15	55068710	55069569	PR-chr15-14611	12.933
chr10	24871474	24872040	PR-chr10-10671	12.932
chr20	57832044	57832667	PR-chr20-24150	12.932
chr8	15395575	15396223	PR-chr8-6086	12.924
chr6	4348944	4349514	PR-chr6-1779	12.915
chr2	238268538	238269165	PR-chr2-94347	12.911
chr5	149889655	149890440	PR-chr5-57454	12.907
chr13	21670144	21670768	PR-chr13-974	12.905
chr2	65791474	65792035	PR-chr2-27784	12.903
chr4	186120215	186120870	PR-chr4-68280	12.9
chr5	16626414	16627032	PR-chr5-7489	12.89
chr5	32298751	32299363	PR-chr5-12739	12.884
chr10	5057266	5058120	PR-chr10-2432	12.872
chr12	38279196	38280094	PR-chr12-18813	12.871
chr16	16042364	16043050	PR-chr16-8044	12.866
chr12	27120950	27121680	PR-chr12-14613	12.864
chr18	27344204	27344733	PR-chr18-11983	12.863
chr10	7315602	7316780	PR-chr10-3407	12.858
chr7	47523378	47524177	PR-chr7-26424	12.854
chr8	18592889	18593524	PR-chr8-7320	12.85
chr1	119243147	119244304	PR-chr1-39079	12.848
chr3	58063558	58064245	PR-chr3-22805	12.843
chr20	61307493	61309059	PR-chr20-26274	12.842
chr1	178107508	178108397	PR-chr1-57417	12.839
chr1	149434178	149434901	PR-chr1-42281	12.831
[truncated: 2,599 more rows]
